1 Calcium depletion challenges endoplasmic reticulum proteostasis by  
2 destabilising BiP-substrate complexes

3  
4 Steffen Preissler<sup>1,2</sup>, Claudia Rato<sup>1</sup>, Yahui Yan<sup>1</sup>, Luke A. Perera<sup>1</sup>, Aron Czako<sup>1</sup>, David Ron<sup>1,2</sup>

5  
6 <sup>1</sup>Cambridge Institute for Medical Research, University of Cambridge, Cambridge CB2 0XY,  
7 United Kingdom

8 <sup>2</sup>Address correspondence to: Steffen Preissler, David Ron

9  
10

## 11 Abstract

12

13 The metazoan endoplasmic reticulum (ER) serves both as a hub for maturation of secreted  
14 proteins and as an intracellular calcium storage compartment, facilitating calcium release-  
15 dependent cellular processes. ER calcium depletion robustly activates the unfolded protein  
16 response (UPR). However, it is unclear how fluctuations in ER calcium impact organellar  
17 proteostasis. Here we report that calcium selectively affects the dynamics of the abundant  
18 metazoan ER Hsp70 chaperone BiP, by enhancing its affinity for ADP. In the calcium replete  
19 ER, ADP rebinding to post-ATP hydrolysis BiP-substrate complexes competes with ATP  
20 binding during both spontaneous and co-chaperone-assisted nucleotide exchange, favouring  
21 substrate retention. Conversely, in the calcium depleted ER, relative acceleration of ADP-to-  
22 ATP exchange favours substrate release. These findings explain the rapid dissociation of  
23 certain substrates from BiP observed in the calcium-depleted ER and suggest a mechanism for  
24 tuning ER quality control and coupling UPR activity to signals that mobilise ER calcium in  
25 secretory cells.

26

## 27 Introduction

28 The endoplasmic reticulum (ER) of eukaryotic cells is a hub for synthesis and processing of  
29 most secreted and membrane proteins. The maturation of these ER clients involves their *N*-  
30 glycosylation, thiol oxidation, folding, and the assembly of multiprotein complexes. Oxidative  
31 folding is error-prone and requires assistance by ER-resident molecular chaperones and  
32 oxidoreductases. A signal transduction pathway, the unfolded protein response (UPR),  
33 regulates ER protein folding capacity by adjusting the expression of chaperones and other  
34 quality control factors to match the load of unfolded proteins (Walter and Ron, 2011). ER  
35 stress, defined as a condition of excess unfolded ER client proteins over the capacity of the  
36 folding machinery, activates UPR signalling to re-establish proteostasis.

37 The ER of animal cells is distinct in maintaining a high concentration of calcium ( $\text{Ca}^{2+}$ )  
38 compared to the surrounding cytoplasm (Alvarez and Montero, 2002; Bygrave and Benedetti,  
39 1996; Meldolesi and Pozzan, 1998; Solovyova and Verkhratsky, 2002). Transient  $\text{Ca}^{2+}$  release  
40 from the ER during signalling events controls numerous processes including gene expression  
41 and exocytosis (Carreras-Sureda et al., 2018; Raffaello et al., 2016). It has long been known  
42 that pharmacological manipulations (Macer and Koch, 1988; Welch et al., 1983; Wong et al.,  
43 1993; Wu et al., 1981) and even physiological cues that deplete ER  $\text{Ca}^{2+}$  (Sans et al., 2002)  
44 activate the UPR transducers, but the role of proteostatic challenge in UPR activation under  
45 these conditions remains unclear.

46 The folded state of some ER clients, like the low-density lipoprotein receptor (Fass et al., 1997),  
47 is stabilised by binding  $\text{Ca}^{2+}$  as a ligand. However, the contribution to UPR activity by the  
48 proteostatic challenge arising from the mass of proteins whose maturation is directly  
49 compromised by low ER  $\text{Ca}^{2+}$  (Cooper et al., 1997; Guest et al., 1997; Lodish and Kong, 1990;  
50 Lodish et al., 1992; Pena et al., 2010) is unknown.

51 Components of the ER protein folding machinery have low-affinity  $\text{Ca}^{2+}$  binding sites, whose  
52 occupancy is likely to decrease upon ER  $\text{Ca}^{2+}$  depletion within the physiological range.  
53 Examples are the lectin-like chaperones calnexin (CNX) and calreticulin (CRT) (Baksh and  
54 Michalak, 1991; Wada et al., 1991), Grp94 (Macer and Koch, 1988; Van et al., 1989), and  
55 protein disulphide isomerase (PDI) (Lebeche et al., 1994; Lucero et al., 1994; Macer and Koch,  
56 1988). These low-affinity binding sites are often found on N- or C-terminal extensions of the  
57 aforementioned proteins, a feature consistent with the observation that their core functions as  
58 chaperones or oxidoreductases are not known to be measurably affected at  $\text{Ca}^{2+}$  levels expected

59 in the depleted ER. In the ER, the functionality of these components might be altered, for  
60 example through the effects of changing  $[Ca^{2+}]$  on their mobility or spatial distribution (Avezov  
61 et al., 2015; Corbett et al., 1999), but presently the significance of this feature remains  
62 unknown. Upon  $Ca^{2+}$  release from the ER, changes to cytoplasmic  $[Ca^{2+}]$  may have important  
63 indirect effects on the ER environment (Groenendyk et al., 2014), but as these are mediated  
64 via changes in gene expression, their inherent latency precludes an important contribution to  
65 the rapid post-translational activation of UPR transducers observed in calcium depleted cells  
66 (Bertolotti et al., 2000; Harding et al., 1999; Wong et al., 1993).

67 Against this background, we were intrigued by the behaviour of the abundant Hsp70-type ER  
68 chaperone BiP upon depletion of ER  $Ca^{2+}$ . Release of ER  $Ca^{2+}$  has long been known to correlate  
69 with disruption of certain BiP-substrate complexes (Suzuki et al., 1991). Such dissociation  
70 occurs very rapidly, on the time-scale of minutes (Preissler et al., 2015), which is inconsistent  
71 with a process driven by the slow build-up of competing unfolded newly-synthesised proteins.  
72 ER  $Ca^{2+}$  depletion is also associated with the appearance of more BiP oligomers (Preissler et  
73 al., 2015). As chaperoning of unfolded proteins by BiP competes with BiP oligomerisation, the  
74 presence of more BiP oligomers is not easy to reconcile with a model whereby a proteostatic  
75 challenge arising from the destabilisation of  $Ca^{2+}$ -binding secreted proteins, or compromised  
76 functionality of parallel chaperone systems (e.g. CNX/CRX, PDI), is the major perturbation to  
77 ER function imposed by low  $[Ca^{2+}]$ .

78 These considerations have led us to revisit the effect of ER  $Ca^{2+}$  depletion on BiP function in  
79 cells and in vitro. Here we report on a molecular basis of ER  $[Ca^{2+}]$ -dependent regulation of  
80 BiP's functional dynamics under physiological conditions. Our observations provide a  
81 plausible explanation for the rapid dissociation of BiP from substrates noted upon ER  $Ca^{2+}$   
82 depletion and suggest a chain of causality, whereby a primary effect of  $[Ca^{2+}]$  on BiP's  
83 chaperone cycle gives rise to a secondary proteostatic challenge in the ER.

84

## 85 Results

### 86 **Divergent effects of ER Ca<sup>2+</sup> depletion and ER proteostatic challenge on** 87 **trafficking of a model BiP substrate protein**

88 To gauge the effect of ER Ca<sup>2+</sup> depletion on trafficking of a model BiP substrate protein  
89 through the secretory pathway to the plasma membrane, we chose the T-cell antigen receptor  
90  $\alpha$  chain (TCR $\alpha$ ). In absence of other TCR complex subunits the luminal part of this  
91 transmembrane protein interacts with BiP as a substrate and is retained in the ER (Suzuki et  
92 al., 1991). The reporter consisted of a cleavable, N-terminal ER targeting signal sequence  
93 fused to a FLAG-M1 sequence and the ectoplasmic/luminal domain of murine TCR $\alpha$ ,  
94 followed by a transmembrane domain and a cytosolically-localised turquoise fluorescent  
95 protein (Tq) (Figure 1A). Since the transmembrane domain of TCR $\alpha$  contains a motif that  
96 leads to rapid ER-associated degradation of the orphan subunit (Bonifacino et al., 1990), it  
97 was replaced in this reporter by the transmembrane domain of the interleukin 2 receptor  $\alpha$   
98 subunit (Bonifacino et al., 1991). We anticipated that reporter transport would expose FLAG-  
99 M1 on the cell surface, making it accessible for immunostaining in non-permeabilised cells.  
100 Further stringency is imparted by the primary FLAG-M1 antibody that only recognises the  
101 epitope on the free N-terminus of TCR $\alpha$  following signal sequence removal. The turquoise  
102 fluorescence signal is thus a measure of reporter expression, while the FLAG-M1 signal is  
103 specific to the surface-exposed fraction.

104 Treatment of a CHO-K1 cell line stably expressing the TCR $\alpha$  reporter with thapsigargin (Tg),  
105 an agent that causes selective loss of ER Ca<sup>2+</sup> by inhibiting the ER Ca<sup>2+</sup> pump SERCA (Sagara  
106 and Inesi, 1991; Thastrup et al., 1990), led to a conspicuous increase of the FLAG-M1 signal,  
107 consistent with retention of the reporter in the ER under normal conditions and its Ca<sup>2+</sup>  
108 depletion-induced migration to the cell surface (Figure 1B), as previously noted (Suzuki et al.,  
109 1991).

110 The TCR $\alpha$  ectoplasmic domain might be subject to multiple competing quality control  
111 processes in the ER as it contains several glycosylation sites that may also engage lectin  
112 chaperones. To focus the reporter on BiP-mediated regulation, all four glycosylation sites were  
113 removed (by single amino acid substitutions), generating a reporter (TCR $\alpha$ -N/Q) that was more  
114 tightly retained intracellularly under basal conditions and exposed on the cell surface upon ER  
115 Ca<sup>2+</sup> release (Figure 1A and B).

116 Importantly, both wildtype TCR $\alpha$  and TCR $\alpha$ -N/Q co-immunoprecipitated with BiP and the  
117 interaction was diminished in Tg-treated cells (Figure 1C). Binding of ATP to BiP lowers its  
118 affinity for substrates and enhances their dissociation (Gaut and Hendershot, 1993; Munro and  
119 Pelham, 1986), a feature common to the Hsp70 chaperone family. Addition of ATP to the cell  
120 lysates strongly decreased co-precipitation of both reporters with BiP, consistent with their  
121 binding to BiP as typical substrates (Figure 1C). Of note, more BiP was bound to TCR $\alpha$ -N/Q  
122 compared to the wildtype version, suggesting that the fate of the mutant reporter more strongly  
123 depends on its association with BiP (Figure 1C, compare lanes 2 and 5). These results agree  
124 with a scenario whereby retention of the TCR $\alpha$  proteins in the ER is mediated by their  
125 interaction with BiP and Ca<sup>2+</sup> depletion leads to reporter dissociation from BiP, facilitating ER  
126 exit and appearance on the cell surface (Suzuki et al., 1991).

127 This interpretation was further corroborated by the observation that Tg-induced progression of  
128 the reporters to the plasma membrane was blocked by brefeldin A (Figure 1-figure supplement  
129 1), which disrupts vesicular transport between ER and the Golgi apparatus (Lippincott-  
130 Schwartz et al., 1989). Moreover, reporter exposure on the cell surface accrued gradually over  
131 several hours (Figure 1-figure supplement 2), consistent with the kinetics of vesicular transport  
132 between ER and the cell surface (Chen et al., 2013; Hirschberg et al., 1998; Suzuki et al., 1991).

133 Next, we examined whether reporter display on the plasma membrane could also arise from an  
134 increased burden of misfolded ER proteins, or if it is a feature specifically related to low ER  
135 Ca<sup>2+</sup>. We used TCR $\alpha$ -N/Q for these experiments due to its improved ER retention  
136 characteristics. Depletion of ER Ca<sup>2+</sup> with the ionophore A23187 also led to accumulation of  
137 the reporter on the cell surface (Figure 1D). In contrast, the reporter remained intracellular  
138 upon treatment with tunicamycin (Tm) or 2-deoxyglucose (2DG) — compounds that cause  
139 protein misfolding in the ER by interfering with *N*-glycosylation (Kozutsumi et al., 1988;  
140 Kurtoglu et al., 2007). These observations suggest that release of the reporter's retention by  
141 Ca<sup>2+</sup> depletion can be uncoupled from a general proteostatic challenge.

142 To further address the relationship between proteostatic challenge, Ca<sup>2+</sup> depletion, and TCR $\alpha$ -  
143 N/Q trafficking, we temporally separated the perturbation to ER protein folding from Ca<sup>2+</sup>  
144 depletion. Treatment of cells with Tm before addition of Tg diminished ER Ca<sup>2+</sup> depletion-  
145 induced reporter exposure on the cell surface (Figure 1E, compare bars 2 and 4). Furthermore,  
146 pharmacological inhibition of basal PERK activity, which increases substrate protein load in  
147 the ER [by dysregulating the influx of newly-synthesised proteins (Harding et al., 2012)], had  
148 a similar effect. The combined application of Tm and PERK inhibitor almost fully blocked

149 subsequent Tg-induced reporter trafficking (Figure 1E, bar 6). Thus, ER stress caused by  
150 accumulation of unfolded proteins seems to disfavour Ca<sup>2+</sup> release-mediated reporter export.  
151 However, despite their divergent effects on reporter redistribution, both Ca<sup>2+</sup> depleting agents  
152 and glycosylation inhibitors robustly activated of UPR (Figure 1F and 1-figure supplement 3).  
153 These findings hint at a qualitative difference between UPR induction caused by proteostatic  
154 challenge and Ca<sup>2+</sup> depletion.

### 155 Ca<sup>2+</sup> decelerates BiP's ATPase cycle

156 The dissociation of BiP from model substrates emerges as an intriguing feature that  
157 distinguishes ER Ca<sup>2+</sup> depletion from manipulations that are known to primarily pose a  
158 proteostatic challenge. BiP has been shown to bind Ca<sup>2+</sup> (Lamb et al., 2006; Lievremont et al.,  
159 1997; Macer and Koch, 1988), but a designated Ca<sup>2+</sup> binding site has not been identified (see  
160 below). We therefore set out to investigate the effect of Ca<sup>2+</sup> on BiP function using cell-free  
161 approaches.

162 Like typical Hsp70s, BiP consists of an N-terminal nucleotide binding domain (NBD) and C-  
163 terminal substrate binding domain (SBD) connected by a hydrophobic linker peptide (Figure  
164 2A). The binding of BiP to its substrates is subject to an ATP binding- and hydrolysis-  
165 dependent allosteric chaperone cycle. In the ATP-bound state, the NBD and SBD are docked  
166 against each other and the SBD adopts an open conformation, allowing fast exchange of  
167 substrates. ATP hydrolysis to ADP causes domain undocking and closure of the SBD, leading  
168 to tight substrate binding. Nucleotide exchange resets the cycle and triggers substrate release.  
169 Under physiological conditions (i.e. in excess of ATP), ATP hydrolysis is considered the rate-  
170 limiting step of the cycle due to BiP's low intrinsic ATPase activity. However, ER-resident J-  
171 domain proteins (JDP) enhance BiP's ATP hydrolysis rate, whereas nucleotide exchange  
172 factors (NEF) stimulate ADP release (Behnke et al., 2015).

173 ATP turnover is a global measure of BiP's activity and is reflected in rates of ADP production.  
174 A kinetic assay detecting oxidation of nicotinamide adenine dinucleotide (NADH) that is  
175 enzymatically coupled to ADP production, confirmed BiP's known low basal ATPase activity  
176 and its stimulation by wildtype JDP cofactor, whereas a non-functional version, JDP<sup>QPD</sup>,  
177 carrying a H-to-Q mutation in the conserved HPD motif of the J-domain (Wall et al., 1994),  
178 did not stimulate BiP's ATPase activity (Figure 2B). Reaction velocity scaled with BiP  
179 concentration, confirming that the assays were performed under non-saturating conditions  
180 (Figure 2-figure supplement 1). Addition of CaCl<sub>2</sub> [to reactions containing magnesium (Mg<sup>2+</sup>)]



181 did not significantly alter BiP's basal ATPase rate but inhibited its JDP-stimulated activity by  
182 ~30% (Figure 2B). The latter may be explained by competition between  $\text{Ca}^{2+}$  and  $\text{Mg}^{2+}$  for  
183 nucleotides — a CaATP pool is more likely to expose its competitive effect on productive  
184 MgATP binding to BiP at JDP-accelerated ATPase rates. This is consistent with the  
185 requirement of  $\text{Mg}^{2+}$  for BiP's ATPase activity (Kassenbrock and Kelly, 1989).

186 These observations seemingly disagree with earlier reports of inhibition of BiP's basal ATPase  
187 activity by  $\text{Ca}^{2+}$  (Kassenbrock and Kelly, 1989; Wei and Hendershot, 1995). Such differences  
188 may relate to the fact that ADP was allowed to accumulate in the assays performed previously,  
189 whereas here it was continuously depleted (and ATP regenerated) by the coupled NADH  
190 oxidation. However, it is plausible that the presence of ADP might be physiologically relevant  
191 and thus important to expose the effect of  $\text{Ca}^{2+}$  on BiP's function observed in vivo.  
192 Corroborating this hypothesis, it has been shown that ADP and  $\text{Ca}^{2+}$  may modulate each other's  
193 affinity for BiP (Lamb et al., 2006). Furthermore, recent reports suggest physiological  
194 fluctuations in ER luminal nucleotide composition, with lower ATP concentrations in the ER  
195 compared with mitochondria and the cytoplasm (Depaoli et al., 2018; Vishnu et al., 2014; Yong  
196 et al., 2019), hinting at a variable and relatively low luminal ATP:ADP ratio.

197 We therefore turned to an assay that detects orthophosphate production and allows  
198 measurement of ATPase activity in presence of ADP. The basal ATPase activity of BiP (at 3  
199 mM  $\text{MgCl}_2$  and 2 mM ATP) was only slightly affected when up to 1.6 mM  $\text{CaCl}_2$  was added  
200 (Figure 2C). However, in presence of 0.5 mM ADP ( $[\text{ATP}]/[\text{ADP}] = 4$ ) titration of  $\text{CaCl}_2$   
201 showed a clear inhibitory effect, lowering the average ATPase rate of BiP by ~44% at the  
202 highest  $[\text{CaCl}_2]$ .  $\text{Ca}^{2+}$ -dependent inhibition was slightly enhanced at 1 mM ADP ( $[\text{ATP}]/[\text{ADP}]$   
203 = 2), with a reduction by ~51%. This was observed in the context of generally lower ATPase  
204 rates measured in presence of ADP, which directly competes with ATP for binding to BiP. The  
205 dependence of  $\text{Ca}^{2+}$ -mediated inhibition on ADP suggested an important effect of  $\text{Ca}^{2+}$  on the  
206 nucleotide exchange phase of BiP's ATPase cycle.

## 207 **$\text{Ca}^{2+}$ favours binding of ADP over ATP to BiP**

208 Based on the above observations we investigated the effect of  $\text{Ca}^{2+}$  on ADP release — the first  
209 step of nucleotide exchange (Figure 2A). Complexes between BiP and MABA-ADP [an ADP  
210 analogue whose fluorescence intensity is enhanced when bound to Hsp70s (Theysen et al.,  
211 1996)] were allowed to form, and the decrease in fluorescence as MABA-ADP dissociated in  
212 presence of an excess of non-fluorescent nucleotides was measured. In presence of 3 mM



213 MgCl<sub>2</sub>, the basal rate of MABA-ADP release from BiP ( $k_{\text{off}} 0.0865 \pm 0.0045 \text{ s}^{-1}$ ) was similar  
214 to values reported earlier (Figure 3A) (Mayer et al., 2003; Preissler et al., 2017). When added  
215 during the dissociation phase, CaCl<sub>2</sub> (up to 1 mM) had little effect on MABA-ADP release.  
216 However, when included alongside the MABA-ADP (and 3 mM MgCl<sub>2</sub>) during the loading  
217 phase, Ca<sup>2+</sup> strongly inhibited release in the subsequent dissociation step (decreasing the  $k_{\text{off}}$   
218  $\sim 5.1$ -fold to  $0.0171 \pm 0.0004 \text{ s}^{-1}$ ) (Fig 3A, compare traces 2 and 3).

219 Importantly, titrating CaCl<sub>2</sub> during MABA-ADP binding to BiP (in presence of 3 mM MgCl<sub>2</sub>)  
220 yielded a half maximal inhibitory concentration (IC<sub>50</sub>) of  $82.3 \pm 16.4 \mu\text{M}$  (Figure 3B). This  
221 value fits well into the estimated range of physiological free Ca<sup>2+</sup> fluctuations (from  $>100 \mu\text{M}$   
222 to low micromolar concentrations) in the ER and suggests that this effect could indeed be  
223 relevant to BiP function in vivo.

224 The NEF, Grp170, enhanced nucleotide release and its net stimulatory effect was considerably  
225 greater when BiP•MABA-ADP complexes were formed in presence of CaCl<sub>2</sub> [ $\sim 3.1$ -fold  
226 (Mg<sup>2+</sup> alone) vs.  $\sim 11.1$ -fold (Ca<sup>2+</sup> and Mg<sup>2+</sup>)] (Figure 3A, compare traces 1 and 4; 3 and 5).  
227 As expected, in samples containing only CaCl<sub>2</sub>, baseline MABA-ADP release was even slower  
228 ( $k_{\text{off}} 0.0098 \pm 0.0007 \text{ s}^{-1}$ ) and the Grp170-mediated stimulation was enhanced further ( $\sim 14.7$ -  
229 fold) (Figure 3-figure supplement 1). The role of NEFs in BiP's chaperone cycle may therefore  
230 be particularly important at the high Ca<sup>2+</sup> levels of the resting ER.

231 To explore the affinities of BiP for nucleotides in presence of Mg<sup>2+</sup> or Ca<sup>2+</sup>, the association and  
232 dissociation rates of MABA-labelled ADP and ATP were compared. Complexes were allowed  
233 to form in presence of either cation. To avoid the confounding effects of ATP hydrolysis, an  
234 ATPase-deficient BiP<sup>T229A</sup> mutant was also used (Gaut and Hendershot, 1993). In Ca<sup>2+</sup>-  
235 containing samples the dissociation of MABA-ADP from wildtype BiP was again slower,  
236 while the association rate was slightly enhanced, resulting in a  $\sim 7.5$ -fold lower dissociation  
237 constant ( $K_{\text{D}}$ ) for ADP binding to BiP in presence of Ca<sup>2+</sup> compared to Mg<sup>2+</sup> (Figure 3C, grey  
238 bars). MABA-ADP bound to BiP<sup>T229A</sup> with a similar  $K_{\text{D}}$  (although the rates were somewhat  
239 higher), indicating that the T229A mutation does not have a major global impact on BiP's  
240 nucleotide binding properties (Figure 3C, red bars). MABA-ATP dissociation from BiP<sup>T229A</sup>  
241 was unaffected by Ca<sup>2+</sup>, but its association was conspicuously slower, leading to a  $\sim 3.2$ -fold  
242 higher  $K_{\text{D}}$  for MABA-ATP binding to BiP in presence of Ca<sup>2+</sup> (Figure 3C, blue bars). Thus,  
243 Ca<sup>2+</sup> has opposite effects on the binding of ADP and ATP to BiP: it enhances BiP's affinity for  
244 ADP while decreasing the affinity for ATP.

245 It has been proposed, based on differential scanning and isothermal titration calorimetry data,  
246 that  $\text{Ca}^{2+}$  and  $\text{Mg}^{2+}$  bind cooperatively with ADP or ATP to BiP (each in a 1:1 stoichiometry)  
247 and that both cations occupy the same or overlapping sites in the NBD (Lamb et al., 2006).  
248 Our findings agree with these conclusions and suggest that  $\text{Ca}^{2+}$  and  $\text{Mg}^{2+}$  compete for  
249 cooperative binding with either nucleotide to BiP. Moreover, the nucleotide release  
250 experiments presented here indicate that  $\text{Ca}^{2+}$ 's effect is played out during BiP•nucleotide  
251 complex formation rather than by cation swap on existing BiP•nucleotide complexes. In  
252 presence of large excess of  $\text{Mg}^{2+}$  and ATP, productive binding of MgATP to Hsp70s is fast  
253 and does not limit the rate of re-entering another round of ATP hydrolysis. However, our  
254 observations suggest that the presence of  $\text{Ca}^{2+}$  favours futile ADP-to-ADP exchange,  
255 attenuating the cycle. This non-productive nucleotide exchange might, to some extent, be  
256 further promoted by a CaATP pool that competes with MgATP for BiP binding. Thus, at  
257 expected physiological ATP:ADP ratios in the ER,  $\text{Ca}^{2+}$  has a substantial impact on the kinetics  
258 of BiP's ATPase cycle and stands to influence its chaperone activity.

### 259 **$\text{Ca}^{2+}$ stabilises interactions between BiP and substrates**

260 The rate of ADP-to-ATP exchange limits the kinetics with which BiP dissociates from its  
261 substrates (Figure 2A). This implies that non-productive ADP exchange cycles, favoured by  
262  $\text{Ca}^{2+}$ , might also affect BiP-substrate interactions. We used biolayer interferometry (BLI) to  
263 monitor the JDP-mediated binding of BiP to immobilised substrate on the surface of a sensor.  
264 This approach tracks transient BiP-substrate interactions in real-time (Preissler et al., 2017). A  
265 biotinylated J-domain (from ERdJ6) was co-immobilised together with a substrate peptide  
266 [P15, (Misselwitz et al., 1998)] on streptavidin-coated BLI sensors (Figure 4A). These were  
267 then transferred to solutions containing BiP to detect its association, followed by introduction  
268 into solutions without BiP to detect its dissociation. The large number and heterogeneity of  
269 potential BiP binding sites on protein-coated sensors provides a good means to study the  
270 substrate binding characteristics of BiP (Preissler et al., 2017). Fast recruitment of BiP was  
271 observed in presence of ATP and  $\text{Mg}^{2+}$  (Figure 4A, traces 1-5). This interaction was dependent  
272 on J-domain-stimulated ATP hydrolysis, as the BiP binding signal was weak in presence of a  
273 non-functional J-domain ( $\text{J}^{\text{QPD}}$ ) [Figure 4A, trace 6 and (Preissler et al., 2017)]. Though slightly  
274 slower, BiP recruitment was also efficient in presence of  $\text{Ca}^{2+}$  ( $[\text{MgCl}_2]/[\text{CaCl}_2] = 3$ ),  
275 suggesting that  $\text{Ca}^{2+}$  competes only weakly with  $\text{Mg}^{2+}$  under these conditions (Figure 4A, trace  
276 2); consistent with slower cooperative binding of CaATP to BiP, compared to MgATP, and the

277 absence of an allosteric effect of  $\text{Ca}^{2+}$  on ATP binding- and hydrolysis-dependent substrate  
278 interactions.

279 BiP molecules bound to the sensor via high-affinity substrate interactions are, by definition, in  
280 a post-hydrolysis state — either ADP-bound or nucleotide-free (apo). Thus, BiP dissociation  
281 is subject to nucleotide exchange events and is accelerated by ATP binding. Accordingly, in  
282  $\text{Mg}^{2+}$ -containing solutions, BiP dissociation was slow in presence of ADP and fast in presence  
283 of ATP. When present in the dissociation phase, the combination of  $\text{Mg}^{2+}$  and  $\text{Ca}^{2+}$   
284 ( $[\text{MgCl}_2]/[\text{CaCl}_2] = 3$ ) did not affect the rate of ATP-induced BiP dissociation from sensors  
285 (Figure 4A, trace 3). Dissociation of BiP was also fast in a solution containing ATP and  $\text{Ca}^{2+}$   
286 as the only divalent cation, indicating that CaATP is able to allosterically trigger BiP  
287 dissociation from its substrates (Figure 4A, trace 5). Given that  $\text{Ca}^{2+}$  slows down the binding  
288 of ATP to BiP (Figure 3C), it seemed surprising that the average dissociation rate was slightly  
289 higher compared to MgATP-induced BiP dissociation. This finding might be explained by poor  
290 hydrolysis of CaATP, countering the contribution of ATP-hydrolysis-dependent re-  
291 establishment of a stable BiP-substrate complex to the BLI signal arising in presence of the  
292 hydrolysable MgATP.

293 In presence of  $\text{Mg}^{2+}$  and both ATP and ADP ( $[\text{ATP}]/[\text{ADP}] = 2$ ), the dissociation of BiP from  
294 J-domain- and P15-coated BLI sensors was slower compared to a solution containing only  
295  $\text{Mg}^{2+}$  and ATP, consistent with direct competition of ADP with ATP for binding to BiP (Figure  
296 4B, trace 3). Addition of  $\text{Ca}^{2+}$  ( $[\text{MgCl}_2]/[\text{CaCl}_2] = 3$ ) to a solution containing both nucleotides  
297 further inhibited dissociation of BiP (Figure 4B, trace 4). This result agrees with the notion that  
298  $\text{Ca}^{2+}$  kinetically extends futile nucleotide exchange cycles by enhancing the affinity of ADP  
299 (but not ATP) for BiP.

300 To dissect this further, BiP•substrate complexes were assembled on J-domain- and P15-coated  
301 BLI sensors (in presence of MgATP, as above) followed by two sequential dissociation steps.  
302 The BiP-loaded sensors were first introduced into solutions containing ADP and either  $\text{Mg}^{2+}$   
303 or  $\text{Ca}^{2+}$  to promote formation of BiP•MgADP•substrate or BiP•CaADP•substrate complexes,  
304 which represent the expected intermediates of futile nucleotide exchange. The sensors were  
305 then transferred to solutions containing  $\text{Mg}^{2+}$  and ATP. BiP bound to a sensor that had been  
306 exposed to  $\text{Mg}^{2+}$  and ADP dissociated twice as fast in the second step than BiP on a sensor that  
307 had been exposed to  $\text{Ca}^{2+}$  and ADP (Figure 4B, compare traces 5 and 6). This observation  
308 indicates that the slow release of CaADP kinetically limits ADP-to-ATP exchange and  
309 consequently ATP-enhanced dissociation of BiP from substrates.

310 These observations suggest that changes in  $[Ca^{2+}]$  (within the physiological range) regulate  
311 BiP's chaperone activity by modulating the kinetics of productive nucleotide exchange, and  
312 thus the rates of substrate release and entry into the next ATPase cycle. These findings propose  
313 a mechanism for the decline in BiP-substrate interactions observed upon ER  $Ca^{2+}$  depletion.  
314 All other things being equal, at high  $[Ca^{2+}]_{ER}$  (resting state) substrate dissociation is slower.  
315 Release of  $Ca^{2+}$  from the ER accelerates ATP binding and substrate dissociation, whereas the  
316 rate at which ATP hydrolysis-dependent substrate interactions are formed remains largely  
317 unaffected. The acceleration of productive nucleotide exchange and substrate dissociation,  
318 relative to substrate binding, partitions BiP from its substrates.

### 319 **Selective responsiveness of ER-localised Hsp70s to $Ca^{2+}$**

320  $Ca^{2+}$  excursions within the range shown here to affect BiP activity are unique to the ER.  
321 Therefore, we deemed it of interest to determine if regulation by  $Ca^{2+}$  is a feature selective to  
322 ER-localised Hsp70 (i.e. BiP) or common to all Hsp70s, regardless of the  $Ca^{2+}$  environment in  
323 which they operate. To this end, we produced and purified bacterial DnaK, the *Drosophila*  
324 *melanogaster* homologue of BiP, as well as human cytosolic Hsp70 (HSPA1A) and Hsc70  
325 (HSPA8).

326 As before, MABA-ADP complexes with the different Hsp70s were formed in presence of  $Mg^{2+}$   
327 and nucleotide release upon exposure to excess of ATP was measured. MABA-ADP release  
328 rates varied between the different Hsp70s (Figure 5A, dark traces). Similar to mammalian BiP,  
329  $Ca^{2+}$  strongly inhibited MABA-ADP release from *Drosophila* BiP (~5.6-fold) but had a more  
330 modest inhibitory effect on MABA-ADP release from DnaK (~1.4-fold), cytosolic Hsp70  
331 (~1.6-fold), and Hsc70 (~2.0-fold) (Figure 5A). Thus, under these conditions,  $Ca^{2+}$  had the  
332 strongest inhibitory effect on MABA-ADP release from BiP paralogues.

333 We also analysed JDP-mediated substrate interactions of the different Hsp70 proteins using the  
334 BLI assay. Dissociation was performed in presence of  $Mg^{2+}$ , ATP, and ADP ( $[ATP]/[ADP] =$   
335  $2$ ). Further addition of  $Ca^{2+}$  had the strongest inhibitory effect on the dissociation of BiP (~1.8-  
336 fold decreased dissociation rate) and *Drosophila* BiP (~2.1-fold decrease), whereas  
337 dissociation of the other chaperones was affected to a lesser degree (Hsp70 ~1.2-fold, Hsc70  
338 ~1.2-fold, DnaK ~1.1-fold) (Figure 5B and C).

339 These observations suggest that sensitivity of nucleotide exchange and substrate interactions  
340 to  $\text{Ca}^{2+}$  is a feature specific to BiP paralogues, perhaps having evolved as an adaptation to the  
341 ER environment.

### 342 **CaADP binding selectively affects BiP's structural stability**

343 To establish if the selective effect of  $\text{Ca}^{2+}$  on ADP binding to BiP is reflected in the structure  
344 of the complex, we purified the NBDs of mammalian BiP, Hsp70, and Hsc70 and co-  
345 crystallised them with  $\text{Ca}^{2+}$  and ADP. High-resolution X-ray crystal structures were obtained  
346 for all three NBDs (Table S1). In each case, additional density in the nucleotide binding cleft  
347 indicated occupancy by ADP (Figure 6-figure supplement 1A) and the overall conformations  
348 of the three NBDs were very similar (Figure 6A). Overlay of the BiP(NBD) structure with the  
349 Hsp70(NBD) and Hsc70(NBD) structures revealed root-mean-squared deviations (RMSD) of  
350 0.769 Å and 0.734 Å over the  $\text{C}_\alpha$  alignment, respectively. Moreover, in each structure,  $\text{Ca}^{2+}$   
351 was identified in the nucleotide binding cleft, where it formed contacts to both phosphate  
352 groups ( $\alpha$  and  $\beta$ ) of the nucleotide as well as indirect contacts to protein residues via several  
353 water molecules (Figure 6A, inset). The position of the  $\text{Ca}^{2+}$  ion and the coordinated water  
354 molecules were nearly identical in all three complexes and similar to a previously reported  
355 lower-resolution structure of human BiP bound to CaADP (Wisniewska et al., 2010). In  
356 contrast, the  $\text{Mg}^{2+}$  ion in an earlier NBD• $\text{Mg}^{2+}$ •ADP structure coordinates only the  $\beta$ -phosphate  
357 of ADP directly (Figure 6B, upper panel), which may contribute to the lower affinity of  
358 MgADP compared to CaADP for NBD binding. The BiP(NBD)• $\text{Ca}^{2+}$ •ADP complex also  
359 resembled the structures of BiP(NBD)<sup>apo</sup> and the NBD of BiP<sup>apo</sup> containing both its NBD and  
360 SBD (Figure 6-figure supplement 1B). The  $\text{Ca}^{2+}$  location is slightly shifted with respect to the  
361 position of  $\text{Mg}^{2+}$  in structures that likely reflect the post-hydrolysis state, where the cation  
362 coordinates orthophosphate ( $\text{P}_i$ ) and the  $\beta$ -phosphate of ADP (Figure 6B, lower panel). The  
363 latter is more similar to the configuration of Hsp70•MgATP complexes, where the  $\text{Mg}^{2+}$  is  
364 located between the  $\beta$ - and  $\gamma$ -phosphate groups of ATP (Figure 6-figure supplement 1C). The  
365  $\text{Ca}^{2+}$  ion in a structure of human Hsp70(NBD) in complex with  $\text{Ca}^{2+}$ , ADP, and  $\text{P}_i$  occupies the  
366 same position as  $\text{Mg}^{2+}$  in a post-hydrolysis state NBD structure (Figure 6-figure supplement  
367 1D). Together, these findings reveal that  $\text{Ca}^{2+}$  participates in the coordination of ADP in the  
368 NBD, which is consistent with cooperative binding of  $\text{Ca}^{2+}$  and nucleotide to BiP. The  
369 structures also imply that binding of  $\text{Ca}^{2+}$  and  $\text{Mg}^{2+}$  is mutually exclusive. This is consistent  
370 with evidence against replacement of  $\text{Mg}^{2+}$  by  $\text{Ca}^{2+}$  in the post-hydrolysis complex and with

371 evidence that  $\text{Ca}^{2+}$  binds together with ADP after release of the hydrolysis products (i.e. to the  
372 apo NBD) in cycles of ADP rebinding. Our structures also revealed a second, surface-exposed  
373  $\text{Ca}^{2+}$  ion, which is unlikely to be involved in allosteric regulation (Figure 6-figure supplement  
374 1E; see discussion).

375 The highly similar CaADP binding mode does not explain the stronger effect of  $\text{Ca}^{2+}$  on BiP  
376 function compared to the other Hsp70s. However, the  $\text{IC}_{50}$  values for  $\text{Ca}^{2+}$ -dependent inhibition  
377 of MABA-ADP release from the NBDs of Hsp70 ( $444.7 \pm 80.5 \mu\text{M}$ ) and Hsc70 ( $345.5 \pm 71.1$   
378  $\mu\text{M}$ ) were much higher than from the NBD of BiP ( $57.1 \pm 7.4 \mu\text{M}$ ) (Figure 6C). The latter was  
379 similar to the  $\text{IC}_{50}$  values of full-length BiP and the *Drosophila* BiP(NBD) ( $52.4 \pm 8.1 \mu\text{M}$ )  
380 (Figure 3B and Figure 6-figure supplement 2A). In contrast, the  $\text{IC}_{50}$  for inhibition of MABA-  
381 ADP release from DnaK(NBD) by  $\text{Ca}^{2+}$  was so high ( $> 8 \text{ mM}$ ) that saturation was not reached  
382 over the titration range (Figure 6-figure supplement 2A). Given that concentrations of  $\text{Ca}^{2+}$  in  
383 the cytoplasm are in the nanomolar range, these results imply that the effect of  $\text{Ca}^{2+}$  on ADP  
384 binding to cytoplasmic Hsp70s has limited physiological relevance. We also tested the NBD  
385 of Kar2, the ER Hsp70 chaperone of yeast (*Saccharomyces cerevisiae*), which had a high  $\text{IC}_{50}$   
386 of  $888.0 \pm 233.6 \mu\text{M}$  (Figure 6-figure supplement 2A). Thus, regulation by  $\text{Ca}^{2+}$  seems specific  
387 to metazoan BiP.

388 Despite their nearly identical CaADP-bound structures, BiP(NBD), Hsp70(NBD), and  
389 Hsc70(NBD) share only 70% sequence identity. We speculated that structural variation that is  
390 inapparent in the low-energy, crystallised state may nonetheless lead to functionally important  
391 differences in thermodynamic stabilisation by  $\text{Ca}^{2+}$  and ADP. Differential scanning fluorimetry  
392 (DSF) measurements revealed that binding of ADP to all NBDs substantially elevated their  
393 melting temperatures ( $T_m$ ), as observed previously for intact BiP (Lamb et al., 2006). The  $T_m$   
394 increased further in presence of  $\text{Ca}^{2+}$  (Figure 6D and 6-figure supplement 2B). Importantly, the  
395 stabilising effect of  $\text{Ca}^{2+}$  was greatest for mammalian and *Drosophila* BiP(NBD), compared to  
396 the cytosolic Hsp70(NBD)s. These findings suggest that CaADP binding to the NBD  
397 selectively decreases the structural flexibility of the ER-localised Hsp70s and thereby  
398 contributes to their observed greater affinity for ADP.

### 399 **Differential sensitivity of BiP oligomers and BiP•substrate complexes to $\text{Ca}^{2+}$**

400 The activity of BiP in the ER is subject to post-translational regulatory mechanisms, one of  
401 which is the transient sequestration of substrate-free BiP into inactive oligomeric assemblies.  
402 These homomeric BiP complexes are based on typical substrate interactions between the SBD



403 of one protomer and the interdomain linker of another protomer (Preissler et al., 2015). As a  
404 consequence, all BiP molecules of an oligomer are in a post-hydrolysis (ADP-bound or apo),  
405 domain-undocked state (Figure 7A). These features entail a chain-like configuration where  
406 only the first BiP molecule ('A') can bind substrate, whereas the SBDs and linkers of all  
407 internal protomers ('B') are occupied. Apart from the last molecule ('C'), which exposes a free  
408 linker, all other protomers are conformationally locked and therefore considered functionally  
409 inactive. This model also predicts that oligomer assembly and disassembly occurs mainly on  
410 one end and involves the 'C' protomer because it provides a binding site for another BiP  
411 molecule (in assembly) and is the only protomer able to undergo ATP-induced domain docking  
412 (required for dissociation). We define this end of BiP oligomers as the 'plus' (+)-end in analogy  
413 to the more dynamic end of cytoskeletal filaments (Figure 7A).

414 The strong propensity of BiP to form oligomers and their architecture is further supported by  
415 structural data: despite lacking part of the flexible C-terminal SBD lid structure and a substrate  
416 binding-weakening V461F mutation, we obtained crystals of BiP in multi-component mixtures  
417 formed by substrate interactions between the SBD and the interdomain linker of adjacent  
418 molecules in the crystal lattice (Figure 7B and Figure 7-figure supplement 1).

419 Due to their characteristics, BiP oligomers are in direct competition with binding of unfolded  
420 substrates, which explains their disappearance during ER stress (Blond-Elguindi et al., 1993;  
421 Preissler et al., 2015). This suggests a physiological role of oligomerisation in buffering folding  
422 capacity by transient withdrawal of BiP from the pool of active chaperones during periods of  
423 declining unfolded protein load. However, the surprising observation that BiP oligomers are  
424 enhanced by ER Ca<sup>2+</sup> depletion seems to contradict this function and remained unexplained so  
425 far (Preissler et al., 2015). We revisited this phenomenon in light of the new insights gleaned  
426 here.

427 BiP oligomers rapidly disassemble in vitro in presence of ATP. However, the hypothesised  
428 process by which BiP oligomers form and disassemble, described above, predicts that specific  
429 inactivation of the 'C' protomer at the (+)-end would render them refractory to the destabilising  
430 effect of ATP. We therefore took advantage of the protease subtilisin A (SubA), that cleaves  
431 BiP site-specifically at the linker sequence (Paton et al., 2006). Under conditions that favour  
432 oligomers, a large fraction of BiP is resistant to SubA cleavage (Preissler et al., 2015), likely  
433 because only the linker of the 'C' protomer is accessible to the protease, whereas the linkers of  
434 all other protomers are protected by an SBD of another BiP protein (Figure 7A). Indeed, size-  
435 exclusion chromatography (SEC) analysis after exposure of BiP to SubA revealed a shift of all



436 peaks to later elution times, consistent with removal of a single NBD from oligomeric  
437 structures and complete cleavage of monomers (Figure 7C).

438 We next formed complexes between BiP and fluorescently-labelled substrate peptide by  
439 extended incubation of BiP (at a concentration where it is largely oligomeric) with trace  
440 amounts of the peptide. The samples were then analysed by SEC and substrate peptide  
441 fluorescence was detected separately from bulk protein absorbance at 230 nm ( $A_{230}$ ), which is  
442 vastly dominated by BiP. The peptide co-eluted with BiP monomers and oligomers (Figure  
443 7D, left panels). The stepwise increase in the ratio of  $A_{230}$  to fluorescence signal with oligomer  
444 size is consistent with each oligomeric species exposing only a single binding site [at its (-)-  
445 end]. As expected, addition of ATP to the sample shortly before injection onto the SEC column  
446 converted BiP oligomers largely into monomers, releasing the bound substrate peptide. As  
447 noted previously, treatment with SubA prior to SEC, shifted the oligomer peaks to later elution  
448 times and abolished the monomer signal in both the  $A_{230}$  and fluorescence channel. However,  
449 in contrast to the intact oligomers, the cleaved species were completely insensitive to ATP-  
450 induced disassembly and peptide release (Figure 7D, right panels). We conclude that  
451 proteolytic removal of the NBD from the terminal protomer stabilises BiP oligomers by  
452 inactivating their only conformationally responsive molecule, the 'C' protomer on the (+)-end.  
453 These data also provide evidence for a strictly directional oligomer disassembly mode that  
454 proceeds from the (+)-end.

455 Their inertness suggested the possibility of separating SubA-cleaved BiP oligomers from other  
456 cleavage products by size to enable their biochemical characterisation (Figure 7D). To this end,  
457 we incubated purified BiP protein at high concentration with SubA followed by preparative  
458 SEC to isolate the early-eluting oligomeric species. Subsequent analytical SEC revealed that  
459 the isolated cleaved oligomers retained their expected elution profile (Figure 7-figure  
460 supplement 2) and proved resistant to ATP-induced disassembly (stable over 3 hours at 26°C),  
461 and thus deemed suitable for further biochemical characterisation (Figure 7-figure supplement  
462 2).

463 MABA-ADP (bound in presence of  $Mg^{2+}$ ) dissociated from stabilised (SubA-cleaved) BiP  
464 oligomers and untreated BiP at similar rates (Figure 7E). Addition of  $Ca^{2+}$  ( $[MgCl_2]/[CaCl_2] =$   
465 3) had a similar inhibitory effect on MABA-ADP dissociation from both samples. In contrast,  
466 under these conditions, Grp170 enhanced the rate of MABA-ADP release from stabilised  
467 oligomers only ~2.9-fold, whereas release from untreated BiP was enhanced ~12.3-fold  
468 (Figure 7E). The latter is consistent with the experiments shown above (Figure 3A). These

469 results indicate (i) that passive nucleotide exchange occurs with normal rates on BiP oligomers  
470 but their conformationally trapped state renders them non-responsive to ATP binding, and (ii)  
471 that oligomers are largely resistant to Grp170-stimulated nucleotide release. Together with the  
472 finding that BiP oligomers disassemble from one end, these observations suggest a mechanism  
473 whereby the relative inertness of the internal protomers kinetically favours BiP oligomers over  
474 other BiP-substrate interactions in the Ca<sup>2+</sup>-depleted ER.

## 475 Discussion

476 The roles of BiP as an abundant effector chaperone and feedback regulator of the UPR render  
477 it an essential guardian of ER physiology. Both functions converge on conventional Hsp70  
478 substrate-binding interactions and are subordinate to the kinetics of nucleotide turnover by  
479 BiP's ATPase activity. The finding that BiP's ATPase cycle is modulated by  $\text{Ca}^{2+}$  fluctuations  
480 within the physiological range suggests a defined mechanism that links ER  $\text{Ca}^{2+}$  changes to  
481 protein homeostasis. In the  $\text{Ca}^{2+}$ -depleted ER, BiP-substrate interactions are destabilised  
482 (Figure 8). The partitioning of substrates away from the only luminal Hsp70 favours trafficking  
483 of those substrates that would otherwise have been retained by BiP, whilst promoting de-  
484 repression of the UPR transducers, themselves BiP substrates. The perturbation to ER  
485 proteostasis is compounded by the polarity of BiP oligomers, which specifies their relative  
486 inertness to  $\text{Ca}^{2+}$  fluctuations, thus kinetically driving BiP to oligomerise and depleting the  
487 pool of active monomers. Alongside the direct role played by  $\text{Ca}^{2+}$  in the folding of certain  
488 secreted proteins, and the role of  $\text{Ca}^{2+}$  binding to low affinity sites in regulating the in vivo  
489 activity of parallel ER chaperones, the aforementioned mechanism goes some way to explain  
490 the well-established relationship between ER  $\text{Ca}^{2+}$  depletion and the activation of ER stress  
491 signalling.

492 Comparison of cytosolic and ER Hsp70s suggests that regulation of BiP by  $\text{Ca}^{2+}$  co-evolved  
493 with the functions of the mammalian ER in  $\text{Ca}^{2+}$  storage and signalling. This is reflected in the  
494 relative insensitivity of cytosolic and bacterial Hsp70s to  $\text{Ca}^{2+}$  and in apparent tuning of  
495 metazoan BiP to the range of physiological ER  $\text{Ca}^{2+}$  fluctuations. In this vein, the yeast ER  
496 Hsp70 Kar2, is of special interest, as we found it to be much less sensitive to  $\text{Ca}^{2+}$  than its  
497 metazoan counter parts. This correlates with the yeast vacuole, not the ER, serving as the major  
498 intracellular  $\text{Ca}^{2+}$  store responsible for regulated  $\text{Ca}^{2+}$  release (Denis and Cyert, 2002;  
499 Halachmi and Eilam, 1989; Strayle et al., 1999).

500 At high CaADP concentrations, the crystallised NBDs of all Hsp70's tested bind the ion-  
501 nucleotide complex indistinguishably. Solution-based assays suggest that subtle differences in  
502 protein stability, arising from the 30% sequence divergence between the NBD of metazoan BiP  
503 and its cytosolic counterparts, may account for their different sensitivity to  $\text{Ca}^{2+}$ . Regardless of  
504 its structural basis, it is intriguing to consider how this specialised feature of BiP (conserved  
505 from mammals to flies) improves fitness.

506 From the pancreatic acinus to killer T cells, secretion of proteins (stored in granules) is  
507 regulated by  $\text{Ca}^{2+}$  release from the ER. The destabilising effect of  $\text{Ca}^{2+}$  depletion on BiP-  
508 substrate complexes may have arisen as a response to situations in which the demands for bulk  
509 protein export from the ER (to replenish secreted protein stores) outweighs the benefits of  
510 stringent quality control (that would otherwise be imposed by more prolonged BiP-substrate  
511 interactions and ER retention). ER quality control responds continuously to the thermodynamic  
512 instability of its substrates (Sekijima et al., 2005). The dissociation of BiP from a class of not  
513 yet natively assembled but export-ready substrates during  $\text{Ca}^{2+}$  signalling events may thus  
514 reflect a mechanism for tuning the stringency of quality control to physiological demands.

515 Activation of the UPR transducers, IRE1, PERK, and ATF6 is a prominent consequence of ER  
516  $\text{Ca}^{2+}$  depletion. Disagreements on the details notwithstanding, most models for UPR regulation  
517 acknowledge the importance of BiP-substrate interactions (Karagoz et al., 2019). In one model,  
518 BiP is thought to bind directly to the regulatory luminal domain of the transducers via typical  
519 BiP-substrate interactions, to keep it in a repressed state (Amin-Wetzel et al., 2019; Amin-  
520 Wetzel et al., 2017). Competing substrates displace BiP from the signal transducers resulting  
521 in their activation. The findings presented here imply that declining ER  $\text{Ca}^{2+}$  favours  
522 dissociation of BiP from UPR signal transducers, which is consistent with previous pulldown  
523 experiments showing release of BiP from PERK and ATF6 upon ER  $\text{Ca}^{2+}$  depletion (Bertolotti  
524 et al., 2000; Shen et al., 2002). Importantly, BiP dissociation under these conditions is complete  
525 on a timescale of minutes and does not require an ongoing supply of nascent unfolded proteins,  
526 placing it upstream of any proteostatic challenge arising directly from  $\text{Ca}^{2+}$  depletion.  
527 Similarly, dissociation of BiP from substrates may fuel the supply of activating ligands of the  
528 UPR transducers (Karagoz et al., 2019). Physiological fluctuations of  $\text{Ca}^{2+}$  levels are often  
529 oscillatory (Berridge et al., 2000; Dupont et al., 2011; Raffaello et al., 2016; Thomas et al.,  
530 1996). The  $\text{Ca}^{2+}$ -entrained pulses of UPR signalling arising from the specialised sensitivity of  
531 BiP to  $\text{Ca}^{2+}$  may have evolved to tune gene expression programs that build secretory capacity  
532 to the secretory activity of cells. Given the reversibility of the  $\text{Ca}^{2+}$  effect on BiP and the  
533 transient nature of physiological  $\text{Ca}^{2+}$  fluctuations, such conditioning of the ER is likely  
534 attained without a significant cost of protein aggregation and proteotoxicity.

535 Our findings indicate that  $\text{Ca}^{2+}$  acts mainly on the nucleotide exchange phase of BiP's  
536 chaperone cycle. After post-hydrolysis ADP release, ATP and ADP compete for binding to  
537 BiP. Depending on the outcome of this competition BiP either enters a futile nucleotide  
538 exchange cycle through ADP re-binding, or acquires ATP, which triggers substrate release.

539  $\text{Ca}^{2+}$  enhances the affinity of ADP for BiP and thereby promotes the ADP-bound state during  
540 nucleotide exchange. The efficiency of ADP-to-ATP exchange and rates of substrate release  
541 are thus inversely related to  $[\text{Ca}^{2+}]$ . As BiP requires MgATP to re-enter its chaperone cycle  
542 (Kassenbrock and Kelly, 1989), the rate at which ATP hydrolysis-dependent interactions with  
543 substrates are formed remain largely unaffected by  $\text{Ca}^{2+}$ . This rationalises the observed  
544 consequences of lowering free  $\text{Ca}^{2+}$  levels in the ER on the interactions of BiP with its  
545 substrates: a decrease in  $[\text{Ca}^{2+}]$  enhances the effective rate of ATP-induced substrate release  
546 from BiP relative to the rate of substrate binding, leading to a net decline of BiP•substrate  
547 complexes.

548 Our structural data show that  $\text{Ca}^{2+}$  binds in the nucleotide binding cleft of the NBD and  
549 participates in coordinating the phosphate groups of ADP. This sufficiently explains the  
550 observed cooperative binding mode of  $\text{Ca}^{2+}$  and nucleotide to BiP. Although none of our  
551 functional experiments indicated that  $\text{Ca}^{2+}$  exerts an allosteric effect on BiP through a  
552 mechanism other than by replacing  $\text{Mg}^{2+}$  during nucleotide binding, an additional  $\text{Ca}^{2+}$  ion was  
553 present on the surface in all of our Hsp70 NBD structures.  $\text{Ca}^{2+}$  binding to this second site is  
554 likely an experimental artefact favoured by the high  $[\text{Ca}^{2+}]$  in the crystallisation solution and  
555 crystal packing. Its relevance to any allosteric regulation of BiP is rendered improbable by the  
556 high degree of solvent exposure of the bound  $\text{Ca}^{2+}$ .

557 Chaperones, in particular BiP, are the most abundant ATPases in the ER (Bakunts et al., 2017;  
558 Dierks et al., 1996). Increasing protein folding load could thus boost ATP consumption by  
559 chaperones and temporarily lower the luminal ATP:ADP ratio. Coupling regulation of BiP by  
560  $\text{Ca}^{2+}$  to the ATP:ADP ratio may therefore save energy at basally high luminal  $[\text{Ca}^{2+}]$  by  
561 amplifying the effect of ADP as a competitor for ATP and thus lowering BiP's ATPase activity.  
562 Similar principles may apply to chaperone systems in other cellular compartments as well  
563 (although there the impact of  $\text{Ca}^{2+}$  is most likely negligible).

564 In contrast, ER  $\text{Ca}^{2+}$  depletion might enhance BiP's ATPase activity. The cost of this to the ER  
565 energy balance may be compensated (at least transiently) by an increase in ATP import into  
566 the organelle (Vishnu et al., 2014; Yong et al., 2019). Furthermore, the effect on global  
567 energetics is mitigated by PERK activation and the attendant decrease in energetically  
568 expensive protein synthesis. In this sense, it is interesting to speculate that BiP's responsiveness  
569 to  $\text{Ca}^{2+}$  is an animal cell feature that co-evolved with the acquisition of PERK.

570 Likewise, BiP oligomerisation may have evolved to alleviate the consequences of enhanced  
571 ATP consumption at low  $\text{Ca}^{2+}$  levels by sequestering BiP in inactive complexes with relatively  
572 slow turnover rates under these conditions. Mechanistically this can be explained by the finding  
573 that BiP oligomer disassembly proceeds in a strictly directional manner and thus might be  
574 relatively slow compared to the one-step dissociation of heterodimeric BiP•substrate  
575 complexes. This difference is likely enhanced at low  $[\text{Ca}^{2+}]$  when ADP-to-ATP exchange is  
576 more efficient and the unidirectional, step-wise dissociation of BiP oligomers imposes an even  
577 greater relative kinetic penalty, causing a redistribution of BiP from heterodimeric  
578 BiP•substrate complexes to oligomers. Furthermore, conformationally trapped oligomeric BiP  
579 is largely resistant to stimulated ADP release by Grp170, the most abundant NEF in the ER  
580 (Behnke et al., 2015; Weitzmann et al., 2007). Grp170 belongs to the Hsp110 class of NEFs,  
581 which bind Hsp70s via a large contact area (Polier et al., 2008). It is therefore possible that part  
582 of the Grp170 binding site on BiP is sterically occluded in oligomers. The differential action  
583 of Grp170 (and potentially other co-factors) on BiP•substrate complexes and oligomers likely  
584 contributes to the altered BiP dynamics at varying  $\text{Ca}^{2+}$  levels.

585 Changes in BiP's substrate interaction kinetics are observed within minutes of ER  $\text{Ca}^{2+}$   
586 depletion (Preissler et al., 2015). The dissociation of substrates from BiP under conditions of  
587 low  $[\text{Ca}^{2+}]$  may allow some of them to escape retention in the ER and enhance their secretion.  
588 This is supported by the behaviour of the BiP-interacting  $\text{TCR}\alpha$  reporters, which migrated to  
589 the cell surface after release of ER  $\text{Ca}^{2+}$  [Figure 1 and (Suzuki et al., 1991)].  $\text{TCR}\alpha$  trafficking  
590 to the cell surface is not observed under conditions that primarily perturb protein folding  
591 homeostasis, suggesting that this effect of ER  $\text{Ca}^{2+}$  depletion is not a consequence of  
592 downstream proteostatic challenge. However, the dominance of the mechanistic link proposed  
593 here for  $\text{TCR}\alpha$ 's itinerary remains unproven, as we are unable to establish a system in which  
594 BiP's essential role as a chaperone is uncoupled from its responsiveness to  $\text{Ca}^{2+}$ . Moreover,  
595 destabilisation of BiP-substrate interactions is likely not the only mechanistic connection  
596 between ER  $\text{Ca}^{2+}$  release, enhanced protein trafficking, and UPR induction. The downstream  
597 perturbation to protein folding arising from substrate release and partitioning to oligomers may  
598 contribute, especially under experimental conditions of protracted ER  $\text{Ca}^{2+}$  depletion following  
599 lengthy application of  $\text{Ca}^{2+}$ -mobilising agents or irreversible uptake inhibitors. The action of  
600 such parallel mechanism is evident in the escape of misfolded prion precursor protein from the  
601 ER quality control upon proteostatic challenge with a reducing agent (Satpute-Krishnan et al.,

602 2014). It should be interesting to define in molecular terms the basis for other condition-  
603 dependent modulation of ER quality control.

604



## 605 Acknowledgements

606 We thank the CIMR flow cytometry facility for technical support, the James Huntington group  
607 (CIMR) for access to BLI equipment, Matthias P. Mayer (University of Heidelberg) for Hsp70  
608 and Hsc70 expression plasmids, and Claes Andréasson (Stockholm University) for Grp170  
609 expression plasmids. We are grateful to the Diamond Light Source for beamtime (proposals  
610 mx21426 and mx27082) and the staff of beamlines I03, I04 and I24 for assistance with data  
611 collection. We also thank Luka Smalinskaite for help with ATPase experiments as well as Alisa  
612 F. Zyryanova and Lisa Neidhardt for comments on the manuscript.

613

## 614 Author contributions

615 **S.P.** Conceptualisation, project administration, methodology, investigation, formal analysis,  
616 visualisation, and writing — original draft preparation.

617 **C.R.** Methodology, investigation, formal analysis, and writing — review and editing.

618 **Y.Y.** Investigation, formal analysis, data curation, visualisation, and writing — review and  
619 editing.

620 **L.P.** Investigation, formal analysis, data curation, and writing — review and editing.

621 **A.C.** Investigation and writing — review and editing.

622 **D.R.** Conceptualisation, methodology, funding acquisition, and writing — original draft  
623 preparation.

624

## 625 Competing interests

626 The authors declare no competing or financial interests.

627

628

629

## 630 Methods

631

### 632 DNA plasmids

633

634 The plasmids used in this study have been described previously or were generated by standard  
635 molecular cloning techniques and are listed in [Table S2](#).

636

### 637 Mammalian cell lines

638

639 CHO-K1 cells (ATCC CCL-61) were phenotypically validated as proline auxotrophs and their  
640 Chinese hamster (*Cricetulus griseus*) origin was confirmed by genomic sequencing. The cells  
641 were grown on cell culture dishes or multi-well plates (Corning) at 37°C and 5% CO<sub>2</sub> in  
642 Nutrient mixture F-12 Ham (Sigma-Aldrich) supplemented with 10% (v/v) serum (FetalClone  
643 II; HyClone), 1× penicillin–streptomycin (Sigma-Aldrich), and 2 mM L-glutamine (Sigma-  
644 Aldrich). Cell lines were randomly tested for mycoplasma contamination using the MycoAlert  
645 Mycoplasma Detection Kit (Lonza). All experiments were performed at cell densities of 60–  
646 90% confluence. Where indicated, cells were treated with 0.5 μM Thapsigargin (Tg;  
647 Calbiochem), 2.5 μg/ml Tunicamycin (Tm; Melford), 10 μM A23187 (Sigma, C7522), 3 mM  
648 2-deoxy-D-glucose (2DG; ACROS Organics), 2 μM PERK inhibitor (PERKi; gift from GSK,  
649 GSK2606414) and 10 μg/ml brefeldin A (BFA; LC Laboratories, B-8500). All compounds  
650 were diluted freshly in pre-warmed medium and applied to the cells by medium exchange.

651

652 The UPR reporter cell line CHO-K1 *CHOP::GFP XBPI::Turquoise* (clone S21) has been  
653 described previously (Sekine et al., 2016). Cell lines stably expressing TCRα and TCRα-N/Q  
654 were generated by targeting CHO-K1 cells with puromycin-resistant retrovirus. For that,  
655 HEK293T cells (ATCC CRL-3216) were cultured in Dulbecco's modified Eagle's medium  
656 (Sigma) supplemented as described above. The cells were split onto 6 cm-dishes 24 h prior to  
657 co-transfection of pBABE Puro plasmids encoding TCRα or TCRα-N/Q (plasmids UK2469  
658 and UK2520, respectively; [Table S2](#)) with VSV-G retroviral packaging vectors, using TransIT-  
659 293 Transfection Reagent (Mirus) according to the manufacturer's instructions. Sixteen hours  
660 after transfection, medium was changed to medium supplemented with 1% BSA (Sigma).  
661 Retroviral infections were performed following a 24 h incubation period by diluting 0.45 μm  
662 filter-sterilised cell culture supernatants at a 1:1 ratio with CHO-K1 cell medium supplemented  
663 with 10 μg/ml polybrene (8 ml final volume) and adding this preparation to target CHO-K1  
664 cells (1 × 10<sup>6</sup> cells seeded onto 10 cm-dishes 24 h prior to infection). After 8 h the viral  
665 supernatants were replaced with fresh medium. The cells were split 48 h later into medium  
666 supplemented with 6 μg/ml puromycin (Calbiochem). After further 24 h the medium was  
667 changed to medium supplemented with 8 μg/ml puromycin. The medium was changed every  
668 third day until puromycin-resistant colonies were visible. Individual clones were isolated and  
669 tested for reporter expression. CHO-K1 TCRα (clone 24) and CHO-K1 TCRα-N/Q (clone 12)  
670 were used for all experiments shown.

671

### 672 Flow cytometry

673

674 To analyse expression of TCRα and TCRα-N/Q reporters on the cell surface, stable CHO-K1  
675 clones (see above) or parental cells were grown on 6-well plates to 80-90% confluence and  
676 treated as indicated. The cells were then washed with 1 ml PBS and incubated in 0.5 ml PBS  
677 + 2 mM EDTA for 5 min at 37°C. Afterwards, the cells were transferred to a 1.2 ml tube  
678 (STARLAB, I1412-7400) and pelleted for 3 min in a swing-out rotor at 1000 rpm in a tabletop  
679 centrifuge (Allegra X-30R, Beckman Coulter). The supernatant was aspirated and cells were

680 suspended in the remaining liquid to  $1 \times 10^5 - 1 \times 10^7$  cells/100  $\mu$ l. The cells were washed with  
681 1 ml ice-cold TBS solution [TBS + 3% bovine serum albumin (BSA) + 2 mM  $\text{CaCl}_2$  + 0.1%  
682  $\text{NaN}_3$ ] and pelleted as above. The supernatant was removed entirely and cells were suspended  
683 in 100  $\mu$ l of the same TBS solution containing mouse monoclonal ANTI-FLAG M1 antibodies  
684 (Sigma, F3040) at a 1:500 dilution. The cells were incubated 30 min on ice while gently mixing  
685 every 10 min. After the incubation time, cells were washed twice in 1 ml TBS solution and  
686 suspended in TBS solution containing Alexa Fluor 488 Goat anti-mouse IgG (Jackson  
687 ImmunoResearch, 115-545-146; 0.75 mg/ml stock in 50% glycerol) at a 1:750 dilution for 30  
688 min on ice in the dark as above. The cells were pelleted, washed with TBS solution and  
689 suspended in 400  $\mu$ l TBS solution for flow cytometry analysis. For analysis of UPR reporter  
690 induction, CHO-K1 S21 cells were treated as indicated, washed with PBS and collected in PBS  
691 containing 4 mM ethylenediaminetetraacetic acid (EDTA).

692  
693 Single-cell fluorescence signals (20,000/sample) were analysed by dual-channel flow  
694 cytometry with an LSRFortessa cell analyser (BD Biosciences). GFP fluorescence and Alexa  
695 Fluor 488 fluorescence was detected with excitation laser 488 nm and a 530/30 emission filter  
696 and Turquoise fluorescence was detected with excitation laser 405 nm and a 450/50 emission  
697 filter. Data were processed using FlowJo and median reporter analysis was performed using  
698 Prism 6.0e (GraphPad).

## 700 **Immunoprecipitation (IP) and immunoblotting**

701  
702 Mammalian cells were grown on 10 cm dishes and treated as indicated. The dishes were then  
703 placed on ice and washed with ice-cold PBS, and cells were detached in PBS containing 1 mM  
704 EDTA using a cell scraper. The cells were sedimented for 5 min at  $370 \times g$  at  $4^\circ\text{C}$  and lysed in  
705 HG lysis buffer (20 mM HEPES-KOH pH 7.4, 150 mM NaCl, 2 mM  $\text{MgCl}_2$ , 10 mM D-  
706 glucose, 10% glycerol, 1% Triton X-100) containing protease inhibitors [2 mM  
707 phenylmethylsulphonyl fluoride (PMSF), 4  $\mu\text{g}/\text{ml}$  pepstatin, 4  $\mu\text{g}/\text{ml}$  leupeptin, 8  $\mu\text{g}/\text{ml}$   
708 aprotinin] with 100 U/ml hexokinase (from *Saccharomyces cerevisiae* type F-300; Sigma) for  
709 10 min on ice. To release BiP from substrates, hexokinase was replaced by 1 mM ATP during  
710 lysis. The lysates were cleared for 10 min at  $21,000 \times g$  at  $4^\circ\text{C}$  and Bio-Rad protein assay  
711 reagent (Bio-Rad) was used to determine the protein concentrations of lysates. Equal volumes  
712 of normalised lysates were incubated for 2 h at  $4^\circ\text{C}$  with 20  $\mu$ l UltraLink Hydrazine Resin  
713 (Pierce, 53149) on which hamster BiP-specific chicken IgY antibodies had been covalently  
714 immobilised (Preissler et al., 2015). The beads were recovered by centrifugation for 1 min at  
715  $1,000 \times g$  and washed three times (for 5 min) with HG lysis buffer. The proteins were eluted  
716 in  $2 \times$  SDS sample buffer and denatured for 10 min at  $70^\circ\text{C}$ . Equal volumes of the samples  
717 were applied to SDS-PAGE and proteins were transferred onto PVDF membranes. The  
718 membranes were blocked with 5% (w/v) dried skimmed milk in TBS and incubated with  
719 primary antibodies followed by IRDye fluorescently labelled secondary antibodies (LiCor).  
720 The membranes were scanned with an Odyssey near-infrared imager (LiCor). Primary  
721 antibodies against hamster BiP [chicken anti-BiP IgY; (Avezov et al., 2013)] and ANTI-FLAG  
722 M1 (see above) were used. The relevant signals were quantified with ImageJ (NIH) and  
723 analysed with Prism 8.4 (GraphPad).

## 725 **Protein purification**

### 727 BiP and stabilised oligomers

728

729 Wildtype (UK173) and T229A mutant (UK838) Chinese hamster BiP proteins with an N-  
730 terminal His6-tag were expressed in M15 *E. coli* cells (Qiagen). The bacterial cultures were  
731 grown in LB medium with 100 µg/ml ampicillin and 50 µg/ml kanamycin at 37°C to an OD<sub>600</sub>  
732 nm of 0.8 and expression was induced with 1 mM isopropylthio β-D-1-galactopyranoside  
733 (IPTG). The cells were further grown for 6 h at 37°C, collected and lysed with a high-pressure  
734 homogeniser (EmulsiFlex-C3; Avestin) in buffer A (50 mM Tris-HCl pH 8, 500 mM NaCl, 1  
735 mM MgCl<sub>2</sub>, 10% glycerol, 20 mM imidazole) containing protease inhibitors (1 mM PMSF, 2  
736 µg/ml pepstatin, 8 µg/ml aprotinin, 2 µM leupeptin) and 0.1 mg/ml DNaseI. The lysates were  
737 cleared for 30 min at 45,000 × g at 4°C and incubated with 1 ml of Ni-NTA agarose beads  
738 (Qiagen) per 1 l of expression culture for 2 h rotating at 4°C. Afterwards, the beads was  
739 transferred to a gravity-flow Econo column (49 ml volume; Bio-Rad) and washed with 2  
740 column volumes (CV) buffer B (50 mM Tris-HCl pH 8.0, 500 mM NaCl, 10% glycerol, 30  
741 mM imidazole), 2 CV buffer C (50 mM Tris-HCl pH 8.0, 300 mM NaCl, 10 mM imidazole, 5  
742 mM β-mercaptoethanol) and buffer C sequentially supplemented with (i) 1 M NaCl, (ii) 10  
743 mM MgCl<sub>2</sub> + 3 mM ATP, (iii) 0.5 M Tris-HCl pH 7.4 or (iv) 35 mM imidazole (2 CV each).  
744 The BiP proteins were then eluted with buffer D (50 mM Tris-HCl pH 8.0, 300 mM NaCl, 5  
745 mM β-mercaptoethanol, 250 mM imidazole), dialysed against HKM (50 mM HEPES-KOH  
746 pH 7.4, 150 mM KCl, 10 mM MgCl<sub>2</sub>) and concentrated with 30-kDa MWCO centrifugal filters  
747 (Amicon Ultra, Merck Millipore). The proteins were flash-frozen in aliquots and stored at  
748 -80°C. To obtain nucleotide-free preparations, the purified proteins were additionally dialysed  
749 24 h at 4°C against 50 mM HEPES-KOH pH 7.4, 150 mM KCl, 4 mM EDTA and twice against  
750 50 mM HEPES-KOH pH 7.4, 150 mM KCl before concentration and freezing.

751  
752 Stabilised BiP oligomers were generated from purified BiP protein (UK173). The proteins were  
753 concentrated in HKM buffer to ~16 mg/ml and SubA protease (produced in-house) (Paton et  
754 al., 2006) was added at 50 ng/µl. After incubation for 40 minutes at 26°C to allow for complete  
755 cleavage, the sample was cooled on ice for 5 min. The solution was then cleared through a 0.22  
756 µm pore size centrifuge tube filter (Spin-X, Corning) and injected onto a Superdex 200 Increase  
757 10/300 GL column (GE Healthcare) equilibrated in 50 mM HEPES-KOH pH 7.4, 150 mM  
758 KCl. The early eluting peak fractions containing oligomeric BiP species were immediately  
759 pooled, concentrated and frozen in aliquots.

#### 760 761 Grp170 and authentic Hsp70s

762  
763 Full-length human Grp170 (UK2225), BiP from *Drosophila melanogaster* (UK2354) as well  
764 as human Hsp70 (UK2510) and Hsc70 (UK2511) were expressed as fusion proteins with an  
765 N-terminal His6-Smt3 in *E. coli* BL21 T7 Express lysY/Iq cells (New England BioLabs,  
766 C3013). The cells were grown in LB medium containing 50 µg/ml kanamycin at 37°C until  
767 OD<sub>600 nm</sub> 0.5. The cells were then transferred to 20°C and expression was induced after 20 min  
768 with 0.5 mM IPTG. After incubation for 14 h, the cells were collected by centrifugation and  
769 suspended in lysis buffer E (50 mM Tris-HCl pH 8, 500 mM NaCl, 20 mM imidazole, 10%  
770 glycerol) containing protease inhibitors (1 mM PMSF, 2 µg/ml pepstatin, 8 µg/ml aprotinin, 2  
771 µM leupeptin). Before lysis 1 mM MgCl<sub>2</sub>, 0.1 mM tris(2-carboxyethyl)phosphine (TCEP), and  
772 0.1 mg/ml DNaseI were added and lysis was performed with an EmulsiFlex-C3 high-pressure  
773 homogeniser. The lysates were cleared for 30 min at 45,000 × g at 4°C and incubated with 0.6  
774 ml of Ni-NTA agarose beads (Qiagen) per 1 l of expression culture (1 ml beads per 1 l  
775 expression culture was used in case of *Drosophila* BiP, Hsp70 and Hsc70) for 1 h rotating at  
776 4°C. Afterwards, the beads were transferred to a 49-ml gravity-flow column and washed with  
777 2 CV lysis buffer E, 2 CV buffer F (25 mM Tris-HCl pH 8, 150 mM NaCl, 10 mM imidazole,



778 5 mM  $\beta$ -mercaptoethanol), and buffer F sequentially supplemented with (i) 1 M NaCl, (ii) 10  
779 mM  $MgCl_2$  + 3 mM ATP + 0.01 mg/ml RNaseA, or (iii) 0.5 M Tris-HCl pH 8 + 1 mM TCEP  
780 (2 CV each), followed by 2 CV buffer F. Proteins were eluted by on-column cleavage with 1.5  
781  $\mu$ g/ml Ulp1 protease carrying a C-terminal StrepII-tag in 2.5 bed volumes buffer TNT-Iz15 (25  
782 mM Tris-HCl pH 8, 150 mM NaCl, 1 mM TCEP, 15 mM imidazole) overnight at 4°C. The  
783 eluate was collected, retained cleavage products were washed off the beads with buffer G, and  
784 all fractions were pooled. The combined eluate was diluted 1:3 in 25 mM Tris-HCl pH 8 + 0.1  
785 mM TCEP, passed through a 0.22  $\mu$ m filter, and further purified by anion exchange  
786 chromatography using a 6 ml RESOURCE Q column (GE Healthcare) equilibrated in 95%  
787 AEX-A (25 mM Tris-HCl pH 8, 25 mM NaCl, 0.1 mM TCEP) and 5% AEX-B (25 mM Tris-  
788 HCl pH 8, 1 M NaCl, 0.1 mM TCEP). Proteins were eluted by applying a gradient from 5 to  
789 50% AEX-B in 25 CV at 6 ml/min. The elution peak fractions corresponding to Grp170 were  
790 pooled and 1 mM TCEP was added. After buffer exchange to HKT (50 mM HEPES-KOH pH  
791 7.4, 150 mM KCl, 1 mM TCEP) and concentration using 30-kDa MWCO centrifugal filters,  
792 the proteins were frozen in aliquots and stored at -80°C. BiP from *Drosophila melanogaster*  
793 (UK2354) and human Hsp70 (UK2510; natural variant E110D) and Hsc70 (UK2511) were all  
794 expressed as fusion proteins with an N-terminal His6-Smt3 and purified likewise.  
795 DnaK (from *Escherichia coli*) with an N-terminal His6-Smt3 (UK2243) was expressed and  
796 purified likewise, except that after anion exchange chromatography the pooled eluate was  
797 adjusted to 500 mM NaCl and 40 mM imidazole. The eluate was then incubated with 1 ml Ni-  
798 NTA agarose for 1 h rotating at 4°C (to remove traces of uncleaved protein). The beads were  
799 then collected by centrifugation at 100  $\times$  g for 2 min and the supernatant was transferred to a  
800 30-kDa MWCO centrifugal filter for buffer exchange to HKT and protein concentration.

801

#### 802 Nucleotide binding domains of BiP, Hsp70 and Hsc70 for crystallisation

803

804 All NBDs were expressed as fusion proteins with a N-terminal His6-Smt3. The NBD of  
805 hamster BiP (UK2039) was produced in M15 *E. coli* cells grown in LB medium containing 50  
806  $\mu$ g/ml kanamycin and 100 mg/ml ampicillin. The NBDs of human Hsp70 (UK2532; natural  
807 variant E110D) and human Hsc70 (UK2533) were produced in *E. coli* BL21 T7 Express  
808 lysY/Iq cells grown in LB medium containing 50  $\mu$ g/ml kanamycin. The cells were grown at  
809 37°C to OD<sub>600 nm</sub> 0.5, transferred to 22°C for 20 min, and expression was induced with 0.5 mM  
810 IPTG. After incubation for 14 h at 22°C the cells were collected by centrifugation and  
811 suspended in lysis buffer G (50 mM Tris-HCl pH 8, 500 mM NaCl, 20 mM imidazole)  
812 containing protease inhibitors (1 mM PMSF, 2  $\mu$ g/ml pepstatin, 8  $\mu$ g/ml aprotinin, 2  $\mu$ M  
813 leupeptin), 1 mM  $MgCl_2$ , 0.1 mM TCEP, and 0.1 mg/ml DNaseI. The cells were lysed with an  
814 EmulsiFlex-C3 high-pressure homogeniser and lysates were centrifuged for 30 min at 45,000  
815  $\times$  g at 4°C. The cleared lysates were incubated with 1 ml Ni-NTA agarose beads per 1 l  
816 expression culture for 30 min rotating at 4°C. The beads were then transferred to a 49-ml  
817 gravity-flow column, washed in 2 CV lysis buffer G, 2 CV buffer H (50 mM Tris-HCl pH 8,  
818 500 mM NaCl, 30 mM imidazole, 5 mM  $\beta$ -mercaptoethanol), 2 CV buffer I (50 mM Tris-HCl  
819 pH 8, 300 mM NaCl, 10 mM imidazole, 5 mM  $\beta$ -mercaptoethanol), and with buffer I  
820 supplemented sequentially with (i) 1 M NaCl, (ii) 10 mM  $MgCl_2$  + 3 mM ATP + 0.01 mg/ml  
821 RNaseA, or (iii) 0.5 M Tris-HCl pH 8 + 1 mM TCEP (2 CV each), followed by 2 CV buffer  
822 TNT-Iz10 (25 mM Tris-HCl pH 8, 150 mM NaCl, 1 mM TCEP, 10 mM imidazole). Proteins  
823 were eluted by on-column cleavage with 3.7  $\mu$ g/ml Ulp1 protease carrying a C-terminal  
824 StrepII-tag in 1 bed volume buffer TNT-Iz10 overnight at 4°C. The eluate was collected,  
825 retained cleavage products were washed off the beads with buffer TNT-Iz10, and all fractions  
826 were pooled. To remove bound nucleotide, the proteins were dialysed for 6 h against buffer J

827 (25 mM Tris-HCl pH 8, 150 mM NaCl, 5 mM EDTA, 5 mM  $\beta$ -mercaptoethanol), 16 h against  
828 fresh buffer J, 6 h against buffer K (25 mM Tris-HCl pH 8, 100 mM NaCl, 5 mM  $\beta$ -  
829 mercaptoethanol), and 16 h against fresh buffer K. The protein solutions were then diluted 1:2  
830 with 25 mM Tris-HCl pH 8 + 0.2 mM TCEP, filtered (0.22  $\mu$ m filter), and applied to anion  
831 exchange chromatography using a 6 ml RESOURCE Q column equilibrated in 100% AEX-A1  
832 (25 mM Tris-HCl pH 8, 75 mM NaCl, 0.2 mM TCEP). The flow-through fractions were  
833 collected and bound proteins were eluted by applying a gradient from 0 to 50% AEX-B2 (25  
834 mM Tris-HCl pH 8, 1 M NaCl, 0.2 mM TCEP) in 25 CV at 5 ml/min. The fractions  
835 corresponding to the NBD proteins were pooled and further purified. In case of the NBDs of  
836 Hsp70 (UK2532) and Hsc70 (UK2533) the unbound material (flow-through of the loading  
837 step) was used for further purification. The proteins were concentrated, applied to gel-filtration  
838 using a Superdex 75 prep grade HiLoad 16/60 column (GE Healthcare) equilibrated in buffer  
839 K (10 mM Tris-HCl pH 8, 150 mM KCl, 0.2 mM TCEP), and proteins were eluted at 0.75  
840 ml/min. The elution peak fractions were pooled, supplemented with 1 mM TCEP, and proteins  
841 were concentrated in 10-kDa MWCO centrifugal filter to ~1-1.5 mM. The protein preparations  
842 were frozen in aliquots and stored at -80°C for crystallisation and functional experiments.  
843

#### 844 Nucleotide binding domains (NBDs) of *Drosophila* BiP, DnaK and Kar2

845  
846 The NBDs were expressed as fusion proteins with a N-terminal His6-Smt3. The NBD of  
847 *Drosophila* BiP (UK2534) was produced in M15 *E. coli* cells grown in LB medium containing  
848 50  $\mu$ g/ml kanamycin and 100 mg/ml ampicillin. The NBDs of DnaK (UK2531) and yeast Kar2  
849 (UK2606) were produced in *E. coli* BL21 T7 Express lysY/Iq cells grown in LB medium  
850 containing 50  $\mu$ g/ml kanamycin. The cells were grown at 37°C to OD<sub>600 nm</sub> 0.5, transferred to  
851 22°C for 20 min, and expression was induced with 0.5 mM IPTG. After incubation for 14 h at  
852 22°C, the cells were collected by centrifugation and suspended in lysis buffer E (50 mM Tris-  
853 HCl pH 8, 500 mM NaCl, 20 mM imidazole, 10% glycerol) containing protease inhibitors (1  
854 mM PMSF, 2  $\mu$ g/ml pepstatin, 8  $\mu$ g/ml aprotinin, 2  $\mu$ M leupeptin), 1 mM MgCl<sub>2</sub>, 0.1 mM  
855 TCEP, and 0.1 mg/ml DNaseI. The cells were lysed with an EmulsiFlex-C3 high-pressure  
856 homogeniser and lysates were centrifuged for 30 min at 45,000  $\times g$  at 4°C. The cleared lysates  
857 were incubated with 1 ml Ni-NTA agarose beads per 1 l expression culture for 30 min rotating  
858 at 4°C. The beads were then transferred to a 49-ml gravity-flow column, washed in 2 CV lysis  
859 buffer G, 2 CV buffer H (50 mM Tris-HCl pH 8, 500 mM NaCl, 30 mM imidazole, 5 mM  $\beta$ -  
860 mercaptoethanol), 2 CV buffer I (50 mM Tris-HCl pH 8, 300 mM NaCl, 10 mM imidazole, 5  
861 mM  $\beta$ -mercaptoethanol) and with buffer I supplemented sequentially with (i) 1 M NaCl, (ii)  
862 10 mM MgCl<sub>2</sub> + 3 mM ATP + 0.01 mg/ml RNaseA, or (iii) 0.5 M Tris-HCl pH 8 + 1 mM  
863 TCEP (2 CV each), followed by 2 CV buffer TNT-Iz10 (25 mM Tris-HCl pH 8, 150 mM  
864 NaCl, 1 mM TCEP, 10 mM imidazole). Proteins were eluted by on-column cleavage with 3.7  
865  $\mu$ g/ml Ulp1 protease carrying a C-terminal StrepII-tag in 1 bed volume buffer TNT-Iz10  
866 overnight at 4°C. The eluate was collected, retained cleavage products were washed off the  
867 beads with buffer TNT-Iz10, and all fractions were pooled. After buffer exchange to HKT (50  
868 mM HEPES-KOH pH 7.4, 150 mM KCl, 1 mM TCEP) and concentration using 10-kDa  
869 MWCO centrifugal filters, the proteins were frozen in aliquots and stored at -80°C for  
870 functional experiments.

871

#### 872 BiP for oligomer crystallisation

873

874 Chinese hamster BiP<sup>T229A-V461F</sup> (residues 28-549) was expressed as an N-terminal His6-Smt3-  
875 tagged protein (UK2090). The purification protocol was the same as used for His6-Smt3-FICD

876 purification described in (Perera et al., 2019) with minor modifications. The protein was  
877 expressed in M15 *E. coli* cells grown in LB medium supplemented with 100 µg/ml ampicillin  
878 and 50 µg/ml kanamycin. After anion exchange chromatography the protein was exchanged  
879 into 10 mM HEPES-KOH pH 7.4, 150 mM KCl, 2 mM MgCl<sub>2</sub>, and 1 mM TCEP by gel  
880 filtration and concentrated to 21 mg/ml.

881  
882 For crystallisation, BiP and an equimolar amount of human FICD<sup>L258D-H363A</sup> [residues 104-445;  
883 UK2093, purified as in (Perera et al., 2019)] were diluted to 150 µM with TNKM (10 mM  
884 Tris-HCl pH 8.0, 100 mM NaCl, 50 mM KCl and 2 mM MgCl<sub>2</sub>) and supplemented with 175  
885 µM ATP. Note: FICD was excluded from the resulting crystals of oligomeric BiP (see below).

### 886 887 Biotinylated J domains

888  
889 The J-domain of *E. coli* DnaJ (amino acids 1-72; UK2470) as well as the wildtype (UK1965;  
890 J) and H422Q mutant (UK1966; J<sup>QPD</sup>) J-domain of mammalian ERdj6 (amino acids 390-455)  
891 were expressed with an AviTag-His6 sequence at the C-terminus in BL21 T7 Express lysY/Iq  
892 cells grown in LB medium containing 50 µg/ml kanamycin. The cells were grown at 37°C to  
893 OD<sub>600 nm</sub> 0.5, transferred to 18°C for 20 min, and expression was induced with 0.5 mM IPTG.  
894 The cells were incubated for 16 h at 18°C during which the recombinant proteins were  
895 biotinylated on the AviTag to sufficient degree by the endogenous *E. coli* BirA biotin ligase.  
896 Afterwards, the cells were collected by centrifugation and lysed in buffer G (50 mM Tris-HCl  
897 pH 8, 500 mM NaCl, 20 mM imidazole) containing protease inhibitors (1 mM PMSF, 2 µg/ml  
898 pepstatin, 8 µg/ml aprotinin, 2 µM leupeptin), 1 mM MgCl<sub>2</sub>, 0.1 mM TCEP, 0.1 mg/ml DNaseI,  
899 and 0.02 mg/ml RNaseA using an EmulsiFlex-C3 high-pressure homogeniser. The lysates were  
900 cleared for 30 min at 45,000 × g at 4°C and the supernatants were incubated with 1 ml Ni-NTA  
901 agarose beads per 1 l expression culture for 2 h rotating at 4°C. The beads were then transferred  
902 to a 49-ml gravity-flow column, washed with 1 CV buffer I (50 mM Tris-HCl pH 8, 300 mM  
903 NaCl, 10 mM imidazole, 5 mM β-mercaptoethanol) and with buffer I supplemented  
904 sequentially with (i) 1 M NaCl, (ii) 10 mM MgCl<sub>2</sub> + 3 mM ATP, or (iii) 0.5 M Tris-HCl pH 8  
905 + 1 mM TCEP (2 CV each), followed by 2 CV buffer I containing 35 mM imidazole. Proteins  
906 were eluted in buffer J (50 mM Tris-HCl pH 8, 300 mM NaCl, 250 mM imidazole) and dialysed  
907 against TNM (50 mM Tris-HCl pH 8, 150 mM NaCl, 2 mM MgCl<sub>2</sub>) for 16 h at 4°C and for  
908 further 6 h against fresh TNM. The protein solutions were frozen in aliquots and stored at -  
909 80°C for Bio-Layer interferometry experiments.

### 910 911 **X-ray crystallography**

912  
913 Concentrated NBD protein preparations (see above) of hamster BiP (UK2039), human Hsp70  
914 (UK2532), and human Hsc70 (UK2533) were adjusted to ~50 mg/ml. The preparations were  
915 supplemented with an additional 7 mM CaCl<sub>2</sub> and 2 mM ADP. Crystallisation of NBDs was  
916 performed in 96-well sitting drop plates by combining 200 nl protein solution with 200 nl  
917 reservoir solution and equilibration at 20°C against 70 µl reservoir solution. Crystallisation of  
918 lid-truncated BiP oligomers was achieved by mixing 100 nl of protein solution and 100 nl  
919 reservoir solution. Diffraction quality crystals grew in the following solutions: BiP(NBD) —  
920 26% PEG6000, 0.2M CaCl<sub>2</sub>, 0.1M NaOAc pH 5; Hsp70(NBD) — 10% PEG8000, 0.1 M Tris  
921 pH 8.4, 0.2 M CaCl<sub>2</sub>; Hsc70(NBD) — 24% PEG3350, 0.2M CaOAc; apo BiP oligomer —  
922 20% PEG3350, 0.1 M Bis-Tris Propane pH 7.5, 0.2 M Na<sub>3</sub>Citrate; ADP-bound BiP oligomer  
923 — 20% PEG3350, 0.2 M K<sub>3</sub>Citrate. Crystals were soaked in cryosolution [the well solutions  
924 containing additional 25% (v/v) glycerol] and snap frozen in liquid nitrogen. Diffraction data  
925 were collected at the Diamond Light Source beamlines i03, i04, and i24 (Diamond Light



926 Source, United Kingdom; see [Table S1](#)) and processed by the XIA2 pipeline (Winter, 2010)  
927 implementing Mosflm (Battye et al., 2011) or XDS (Kabsch, 2010) for indexing and  
928 integration, Pointless (Evans, 2011) for space group determination, and Aimless (Winn et al.,  
929 2011), for scaling and merging. All structures were solved by molecular replacement in Phaser  
930 (McCoy et al., 2007). NBD datasets were solved by using BiP nucleotide binding domain (PDB  
931 3IUC) as the search model. BiP oligomer structures were solved by searching for an ensemble  
932 of apo BiP's NBD and SBD, taken from PDB 6HAB. Manual model building was carried out  
933 in COOT (Emsley et al., 2010) and further refinements were performed in refmac5 (Winn et  
934 al., 2001) and phenix.refine (Liebschner et al., 2019). The final refinement statistics are  
935 summarised in [Table S1](#). The structural graphs were generated with UCSF Chimera (Pettersen  
936 et al., 2004) and Pymol (version 1.3 educational). CheckMyMetal (Zheng et al., 2017) has been  
937 used for metal validation. The polder-maps in [Figure 6-figure supplement 1A](#) were calculated  
938 using phenix.polder (Liebschner et al., 2017) by omitting ADP, Ca<sup>2+</sup> and Ca<sup>2+</sup>-coordinated  
939 water molecules.

940

941

### 942 **NADH ATPase assay**

943

944 BiP (UK173), J (UK1965) and J<sup>QPD</sup> (UK1966) proteins were diluted from concentrated stocks  
945 and exposed to ATP and  $\beta$ -NADH to start the reactions. Proteins were used at final  
946 concentrations as indicated. The reactions were performed in HK solution (50 mM HEPES-  
947 KOH pH 7.4, 100 mM KCl) containing 10 mM MgCl<sub>2</sub>, 0.05% Triton X-100, 1 mM TCEP. The  
948 reactions also contained 4 mM ATP, 3 mM Phospho(enol)pyruvic acid (PEP; Sigma, P0564),  
949 0.25 mM  $\beta$ -NADH (Sigma, N8129), and pyruvate kinase/lactic dehydrogenase enzyme mix  
950 (diluted final 1:45; Sigma, P0294). Where indicated 3 mM CaCl<sub>2</sub> was present. The reactions  
951 were carried out in a final volume of 110  $\mu$ l in 384-well microplates ( $\mu$ Clear ; Grainer bio-one,  
952 781096) and  $\beta$ -NADH absorbance at 340 nm ( $A_{340}$ ) was measured over time at 25°C with a  
953 Clariostar plate reader (BMG Labtech). Linear regression analysis was performed with Prism  
954 8 (GraphPad) and the ATP hydrolysis activity were calculated using the molar extinction  
955 coefficient of  $\beta$ -NADH ( $\epsilon = 6220 \text{ M}^{-1} \text{ cm}^{-1}$ ).

956

### 957 **Malachite green ATPase assay**

958

959 Malachite green (MG) reaction solution was prepared freshly by combining stock solutions of  
960 MG dye (0.111% malachite green, 6 N sulphuric acid), 7.5% ammonium molybdate, and 11%  
961 Tween 20 in a 5:1.25:0.1 ratio. Samples of BiP protein (UK173) at 5  $\mu$ M were prepared in HK  
962 solution containing 3 mM MgCl<sub>2</sub> and 3 mM ATP in a final volume of 20  $\mu$ l. Where indicated  
963 ADP and CaCl<sub>2</sub> was added. The samples were incubated for 1.5 h at 26°C. Afterwards, 15  $\mu$ l  
964 of each sample were diluted with 135  $\mu$ l water on a 96-well plate, mixed with 50  $\mu$ l MG  
965 reaction solution and incubated for 2 min at room temperature. Twenty  $\mu$ l of a 34% sodium  
966 citrate solution were added to each well. After further 30 min incubation at room temperature  
967 the absorbance at 623 nm ( $A_{623}$ ) was measured with a plate reader (SpectraMax, Molecular  
968 Devices). Standard curves from serial dilutions of KH<sub>2</sub>PO<sub>4</sub> served as a reference to calculate  
969 the specific ATPase activity.

970

### 971 **Nucleotide binding assays**

972

973 Nucleotide release and binding measurements were performed using the fluorescent nucleotide  
974 analogues MABA-ADP (Jena Bioscience, NU-893-MNT) and MABA-ATP (Jena Bioscience,  
975 NU-806-MNT) carrying a MANT moiety whose fluorescence increases upon binding to

976 Hsp70s (Theyssen et al., 1996). The measurements were started by adding 55  $\mu$ l of solution A  
977 to 5  $\mu$ l of solution B (specified below) in a quartz cuvette (Hellma Analytics) and fluorescence  
978 (excitation 360 nm, emission 420 nm) was detected over time with a fluorescence spectrometer  
979 (Perkin Elmer LS55) at 26°C. All solutions contained 50 mM HEPES-KOH pH 7.4, 100 mM  
980 KCl.

981  
982 To measure nucleotide release, 1.42  $\mu$ M fluorescent nucleotide analogues were incubated with  
983 1.42  $\mu$ M proteins in solution A for at least 1 h at 26°C to allow for complex formation (binding  
984 phase). Solution B contained assay buffer with 18 mM MgATP. Where specified, 15.6  $\mu$ M  
985 Grp170 were added to solution B. The final concentrations after mixing (release phase) were  
986 1.3  $\mu$ M for each protein, 1.3  $\mu$ M fluorescent nucleotides, and 1.5 mM MgATP. The solutions  
987 contained MgCl<sub>2</sub> and CaCl<sub>2</sub> where indicated (final concentrations are stated on the figures and  
988 in figure legends). For Ca<sup>2+</sup> titration experiments, CaCl<sub>2</sub> was present in solution A and final  
989 [CaCl<sub>2</sub>] are plotted on the graphs and were used to calculate IC<sub>50</sub> values. The dissociation rate  
990 constants ( $k_{\text{off}}$ ) were determined by fitting the data to a one phase exponential function using  
991 Prism 8.4 (GraphPad). In experiments involving cytoplasmic Hsp70s all solutions contained  
992 0.2 mM TCEP (Figure 5A, Figure 6C, Figure 6-figure supplement 2A).

993  
994 The association rate constants (Figure 3C) were determined by combining nucleotide-free BiP  
995 (UK173) or BiP<sup>T229A</sup> (UK838) proteins (in solution A) with MABA-ADP or MABA-ATP (in  
996 solution B) at the start of the measurement. Solutions A and B contained either 1 mM MgCl<sub>2</sub>  
997 or CaCl<sub>2</sub>. Each association rate was calculated from six individual measurements, covering a  
998 final protein concentration range from 1.3  $\mu$ M to 7.8  $\mu$ M. For that, the data were fitted to a one  
999 phase exponential function and the observed rates ( $k_{\text{obs}}$ ) were plotted against the protein  
1000 concentration to calculate association rate constants ( $k_{\text{on}}$ ) with the equation  $k_{\text{obs}} = k_{\text{on}}[\text{protein}]$   
1001 +  $k_{\text{off}}$  using the dissociation rate constants ( $k_{\text{off}}$ ) determined separately under the same  
1002 conditions.

### 1003 1004 **Bio-Layer interferometry (BLI)**

1005  
1006 BLI experiments were performed on the FortéBio Octet RED96 System (Pall FortéBio) in  
1007 buffer solution containing 50 mM HEPES-KOH pH 7.4, 100 mM KCl, 0.2 mM TCEP, and  
1008 0.05% Triton X-100 (HKTTx). Nucleotide and divalent cations were added as indicated.  
1009 Streptavidin (SA)-coated biosensors (Pall FortéBio) were hydrated in HKTTx solution for at  
1010 least 10 min prior to use. Experiments were conducted at 28°C and 700 rpm shake speed and  
1011 binding signals were recorded at an acquisition rate of 10 Hz. BLI reactions were prepared in  
1012 200  $\mu$ l volumes in 96-well microplates (greiner bio-one, 655209). The following assay steps  
1013 were performed: After an initial equilibration step in HKTTx solution (I), JDPs (J, UK1965 or  
1014 J<sup>QPD</sup>, UK1966) carrying a biotinylated Avi-tag (each at 5  $\mu$ M in HKTTx) were loaded until a  
1015 binding signal of ~0.4 nm was reached. After a brief wash step in assay solution (III) the  
1016 binding sites on the sensors were saturated with P15 peptide (ALLLSAPRRGAGKK,  
1017 biotinylated on the C-terminal lysine; custom synthesised by GenScript, Piscataway, NJ)  
1018 solubilised at 100 nM in HKTTx solution (IV). The sensors were then washed in HKTTx until  
1019 a stable baseline signal was established (V). Association of BiP or other Hsp70s was performed  
1020 in HKTTx solution containing 3 mM MgCl<sub>2</sub>, 1.5 mM ATP and the indicated proteins at 5  $\mu$ M  
1021 (VI). To allow for dissociation, the sensors were transferred to protein-free assay solution with  
1022 variable components as indicated (VII). The data were processed in Prism 8.4 (GraphPad) and  
1023 dissociation rate constants were obtained by fitting to a one phase exponential function. When  
1024 DnaK was analysed (Figure 5C), a JDP containing the J-domain of DnaJ was immobilised  
1025 (UK2470).

1026  
1027  
1028  
1029  
1030  
1031  
1032  
1033  
1034  
1035  
1036  
1037  
1038  
1039  
1040  
1041  
1042  
1043  
1044  
1045  
1046  
1047  
1048  
1049  
1050  
1051  
1052  
1053  
1054  
1055  
1056  
1057  
1058  
1059  
1060  
1061  
1062  
1063  
1064  
1065  
1066  
1067  
1068  
1069  
1070  
1071  
1072  
1073  
1074

## Differential scanning fluorimetry (DSF)

DSF measurements were performed on a Bio-Rad CFX96 Touch Real-Time PCR Detection System in 96-well plates (Bio-Rad Hard-Shell, #HSP9601) sealed with transparent adhesive film (Bio-Rad Microseal ‘B’ Adhesive Sealer, #MSB1001). Samples were prepared in a volume of 25  $\mu$ l. The solutions contained 50 mM HEPES–KOH pH 7.4, 100 mM KCl, 1 mM TCEP and SYPRO orange protein gel stain at a 1:500 dilution of the manufacturer’s stock (Invitrogen, S6651). The samples also contained 5  $\mu$ M NBD protein, 4 mM ADP, and 6 mM MgCl<sub>2</sub> or CaCl<sub>2</sub> as indicated. The plates were centrifuged for 1 min at 150  $\times$  g before the experiment. Temperature scanning was performed in 0.5°C intervals from 20 to 95°C and SYPRO orange fluorescence was detected. The data were then analysed in Prism 8.4 (GraphPad) and the melting temperature ( $T_m$ ) was determined as the temperature corresponding to the global minimum of the negative first derivatives of the melt curves.

## Size-exclusion chromatography (SEC)

Samples for analytical SEC were prepared in SEC buffer (50 mM HEPES-KOH pH 7.4, 150 mM KCl, 10 mM MgCl<sub>2</sub>) in a final volume of 25  $\mu$ l. The samples were incubated for at least 20 min at 25°C before 10  $\mu$ l were injected onto a SEC-3 HPLC column (300 Å pore size; Agilent Technologies, Santa Clara, CA) equilibrated with SEC buffer. The runs were performed at a flow rate of 0.3 ml/min at 26°C and peptide bond absorbance at 230 nm ( $A_{230}$ ) was detected and plotted against the elution time. A gel filtration standard (Bio-Rad, 151–1901) was applied as a size reference and the elution peaks of Thyroglobulin (670 kDa),  $\gamma$ -globulin (158 kDa), Ovalbumin (44 kDa), and Myoglobin (17 kDa) are indicated.

In the experiment shown in [Figure 7C](#), the samples contained 40  $\mu$ M BiP protein (UK173) and 1 mM ADP and the samples were incubated for 20 min at 24°C before SEC analysis. Where indicated, 36 ng/ $\mu$ l SubA protease was added during the incubation period.

For the experiment shown in [Figure 7D](#), BiP at 50  $\mu$ M was incubated for 6 h at 24°C with 1 mM ADP and 1.3  $\mu$ M fluorescently labelled NR peptide (NRLLLTG carrying a fluorescein moiety at the N-terminus, custom synthesised by GenScript at >95% purity) (Yang et al., 2017). Afterwards, the samples were incubated without or with SubA protease (36 ng/ $\mu$ l) for 30 min before SEC analysis. Where indicated, 5 mM ATP was added 10 min before injection onto the column. The final concentration of BiP in the samples was 45  $\mu$ M. The fluorescein fluorescence signal (excitation 495nm; emission 520 nm) of the peptide was recorded separately during the SEC runs.

For the experiment shown in [Figure 7-figure supplement 2](#), untreated BiP protein or SubA-treated, purified BiP oligomers (both at 20  $\mu$ M) were incubated without or with 4 mM ATP in SEC buffer solution at 26°C as indicated. The BiP oligomers had been thawed from frozen stocks before the experiment.

## *t*-tests

Unpaired (degrees of freedom = total sample size minus 2), parametric (assuming equal variance), *t*-tests were applied where indicated using GraphPad Prism 8.

## 1075 References

1076

- 1077 1. Alvarez, J., and Montero, M. (2002). Measuring [Ca<sup>2+</sup>] in the endoplasmic reticulum  
1078 with aequorin. *Cell Calcium* *32*, 251-260.
- 1079 2. Amin-Wetzel, N., Neidhardt, L., Yan, Y., Mayer, M.P., and Ron, D. (2019).  
1080 Unstructured regions in IRE1alpha specify BiP-mediated destabilisation of the luminal  
1081 domain dimer and repression of the UPR. *Elife* *8*.
- 1082 3. Amin-Wetzel, N., Saunders, R.A., Kamphuis, M.J., Rato, C., Preissler, S., Harding,  
1083 H.P., and Ron, D. (2017). A J-Protein Co-chaperone Recruits BiP to Monomerize IRE1  
1084 and Repress the Unfolded Protein Response. *Cell* *171*, 1625-1637 e1613.
- 1085 4. Avezov, E., Cross, B.C., Kaminski Schierle, G.S., Winters, M., Harding, H.P., Melo,  
1086 E.P., Kaminski, C.F., and Ron, D. (2013). Lifetime imaging of a fluorescent protein  
1087 sensor reveals surprising stability of ER thiol redox. *J Cell Biol* *201*, 337-349.
- 1088 5. Avezov, E., Konno, T., Zyryanova, A., Chen, W., Laine, R., Crespillo-Casado, A.,  
1089 Melo, E.P., Ushioda, R., Nagata, K., Kaminski, C.F., *et al.* (2015). Retarded PDI  
1090 diffusion and a reductive shift in poise of the calcium depleted endoplasmic reticulum.  
1091 *BMC Biol* *13*, 2.
- 1092 6. Baksh, S., and Michalak, M. (1991). Expression of calreticulin in *Escherichia coli* and  
1093 identification of its Ca<sup>2+</sup> binding domains. *J Biol Chem* *266*, 21458-21465.
- 1094 7. Bakunts, A., Orsi, A., Vitale, M., Cattaneo, A., Lari, F., Tade, L., Sitia, R., Raimondi,  
1095 A., Bachi, A., and van Anken, E. (2017). Ratiometric sensing of BiP-client versus BiP  
1096 levels by the unfolded protein response determines its signaling amplitude. *Elife* *6*.
- 1097 8. Battye, T.G., Kontogiannis, L., Johnson, O., Powell, H.R., and Leslie, A.G. (2011).  
1098 iMOSFLM: a new graphical interface for diffraction-image processing with MOSFLM.  
1099 *Acta Crystallogr D Biol Crystallogr* *67*, 271-281.
- 1100 9. Behnke, J., Feige, M.J., and Hendershot, L.M. (2015). BiP and its nucleotide exchange  
1101 factors Grp170 and Sil1: mechanisms of action and biological functions. *J Mol Biol*  
1102 *427*, 1589-1608.
- 1103 10. Berridge, M.J., Lipp, P., and Bootman, M.D. (2000). The versatility and universality of  
1104 calcium signalling. *Nat Rev Mol Cell Biol* *1*, 11-21.
- 1105 11. Bertolotti, A., Zhang, Y., Hendershot, L.M., Harding, H.P., and Ron, D. (2000).  
1106 Dynamic interaction of BiP and ER stress transducers in the unfolded-protein response.  
1107 *Nat Cell Biol* *2*, 326-332.
- 1108 12. Blond-Elguindi, S., Fourie, A.M., Sambrook, J.F., and Gething, M.J. (1993). Peptide-  
1109 dependent stimulation of the ATPase activity of the molecular chaperone BiP is the  
1110 result of conversion of oligomers to active monomers. *J Biol Chem* *268*, 12730-12735.
- 1111 13. Bonifacino, J.S., Cosson, P., and Klausner, R.D. (1990). Colocalized transmembrane  
1112 determinants for ER degradation and subunit assembly explain the intracellular fate of  
1113 TCR chains. *Cell* *63*, 503-513.
- 1114 14. Bonifacino, J.S., Cosson, P., Shah, N., and Klausner, R.D. (1991). Role of potentially  
1115 charged transmembrane residues in targeting proteins for retention and degradation  
1116 within the endoplasmic reticulum. *EMBO J* *10*, 2783-2793.
- 1117 15. Bygrave, F.L., and Benedetti, A. (1996). What is the concentration of calcium ions in  
1118 the endoplasmic reticulum? *Cell Calcium* *19*, 547-551.
- 1119 16. Carreras-Sureda, A., Pihan, P., and Hetz, C. (2018). Calcium signaling at the  
1120 endoplasmic reticulum: fine-tuning stress responses. *Cell Calcium* *70*, 24-31.
- 1121 17. Chen, D., Gibson, E.S., and Kennedy, M.J. (2013). A light-triggered protein secretion  
1122 system. *J Cell Biol* *201*, 631-640.



- 1123 18. Cooper, G.R., Brostrom, C.O., and Brostrom, M.A. (1997). Analysis of the  
1124 endoplasmic reticular Ca<sup>2+</sup> requirement for alpha1-antitrypsin processing and  
1125 transport competence. *Biochem J* 325 ( Pt 3), 601-608.
- 1126 19. Corbett, E.F., Oikawa, K., Francois, P., Tessier, D.C., Kay, C., Bergeron, J.J., Thomas,  
1127 D.Y., Krause, K.H., and Michalak, M. (1999). Ca<sup>2+</sup> regulation of interactions between  
1128 endoplasmic reticulum chaperones. *J Biol Chem* 274, 6203-6211.
- 1129 20. Denis, V., and Cyert, M.S. (2002). Internal Ca(2+) release in yeast is triggered by  
1130 hypertonic shock and mediated by a TRP channel homologue. *J Cell Biol* 156, 29-34.
- 1131 21. Depaoli, M.R., Karsten, F., Madreiter-Sokolowski, C.T., Klec, C., Gottschalk, B.,  
1132 Bischof, H., Eroglu, E., Waldeck-Weiermair, M., Simmen, T., Graier, W.F., *et al.*  
1133 (2018). Real-Time Imaging of Mitochondrial ATP Dynamics Reveals the Metabolic  
1134 Setting of Single Cells. *Cell Rep* 25, 501-512 e503.
- 1135 22. Dierks, T., Volkmer, J., Schlenstedt, G., Jung, C., Sandholzer, U., Zachmann, K.,  
1136 Schlotterhose, P., Neifer, K., Schmidt, B., and Zimmermann, R. (1996). A microsomal  
1137 ATP-binding protein involved in efficient protein transport into the mammalian  
1138 endoplasmic reticulum. *EMBO J* 15, 6931-6942.
- 1139 23. Dupont, G., Combettes, L., Bird, G.S., and Putney, J.W. (2011). Calcium oscillations.  
1140 *Cold Spring Harb Perspect Biol* 3.
- 1141 24. Emsley, P., Lohkamp, B., Scott, W.G., and Cowtan, K. (2010). Features and  
1142 development of Coot. *Acta Crystallogr D Biol Crystallogr* 66, 486-501.
- 1143 25. Evans, P.R. (2011). An introduction to data reduction: space-group determination,  
1144 scaling and intensity statistics. *Acta Crystallogr D Biol Crystallogr* 67, 282-292.
- 1145 26. Fass, D., Blacklow, S., Kim, P.S., and Berger, J.M. (1997). Molecular basis of familial  
1146 hypercholesterolaemia from structure of LDL receptor module. *Nature* 388, 691-693.
- 1147 27. Gaut, J.R., and Hendershot, L.M. (1993). Mutations within the nucleotide binding site  
1148 of immunoglobulin-binding protein inhibit ATPase activity and interfere with release  
1149 of immunoglobulin heavy chain. *J Biol Chem* 268, 7248-7255.
- 1150 28. Groenendyk, J., Peng, Z., Dudek, E., Fan, X., Mizianty, M.J., Dufey, E., Urra, H.,  
1151 Sepulveda, D., Rojas-Rivera, D., Lim, Y., *et al.* (2014). Interplay between the  
1152 oxidoreductase PDIA6 and microRNA-322 controls the response to disrupted  
1153 endoplasmic reticulum calcium homeostasis. *Sci Signal* 7, ra54.
- 1154 29. Guest, P.C., Bailyes, E.M., and Hutton, J.C. (1997). Endoplasmic reticulum Ca<sup>2+</sup> is  
1155 important for the proteolytic processing and intracellular transport of proinsulin in the  
1156 pancreatic beta-cell. *Biochem J* 323 ( Pt 2), 445-450.
- 1157 30. Halachmi, D., and Eilam, Y. (1989). Cytosolic and vacuolar Ca<sup>2+</sup> concentrations in  
1158 yeast cells measured with the Ca<sup>2+</sup>-sensitive fluorescence dye indo-1. *FEBS Lett* 256,  
1159 55-61.
- 1160 31. Harding, H.P., Zhang, Y., and Ron, D. (1999). Protein translation and folding are  
1161 coupled by an endoplasmic-reticulum-resident kinase. *Nature* 397, 271-274.
- 1162 32. Harding, H.P., Zyryanova, A.F., and Ron, D. (2012). Uncoupling proteostasis and  
1163 development in vitro with a small molecule inhibitor of the pancreatic endoplasmic  
1164 reticulum kinase, PERK. *The Journal of biological chemistry*.
- 1165 33. Hirschberg, K., Miller, C.M., Ellenberg, J., Presley, J.F., Siggia, E.D., Phair, R.D., and  
1166 Lippincott-Schwartz, J. (1998). Kinetic analysis of secretory protein traffic and  
1167 characterization of golgi to plasma membrane transport intermediates in living cells. *J*  
1168 *Cell Biol* 143, 1485-1503.
- 1169 34. Kabsch, W. (2010). Xds. *Acta Crystallogr D Biol Crystallogr* 66, 125-132.
- 1170 35. Karagoz, G.E., Acosta-Alvear, D., and Walter, P. (2019). The Unfolded Protein  
1171 Response: Detecting and Responding to Fluctuations in the Protein-Folding Capacity  
1172 of the Endoplasmic Reticulum. *Cold Spring Harb Perspect Biol* 11.

- 1173 36. Kassenbrock, C.K., and Kelly, R.B. (1989). Interaction of heavy chain binding protein  
1174 (BiP/GRP78) with adenine nucleotides. *EMBO J* 8, 1461-1467.
- 1175 37. Kozutsumi, Y., Segal, M., Normington, K., Gething, M.J., and Sambrook, J. (1988).  
1176 The presence of malfolded proteins in the endoplasmic reticulum signals the induction  
1177 of glucose-regulated proteins. *Nature* 332, 462-464.
- 1178 38. Kurtoglu, M., Gao, N., Shang, J., Maher, J.C., Lehrman, M.A., Wangpaichitr, M.,  
1179 Savaraj, N., Lane, A.N., and Lampidis, T.J. (2007). Under normoxia, 2-deoxy-D-  
1180 glucose elicits cell death in select tumor types not by inhibition of glycolysis but by  
1181 interfering with N-linked glycosylation. *Mol Cancer Ther* 6, 3049-3058.
- 1182 39. Lamb, H.K., Mee, C., Xu, W., Liu, L., Blond, S., Cooper, A., Charles, I.G., and  
1183 Hawkins, A.R. (2006). The affinity of a major Ca<sup>2+</sup> binding site on GRP78 is  
1184 differentially enhanced by ADP and ATP. *J Biol Chem* 281, 8796-8805.
- 1185 40. Lebeche, D., Lucero, H.A., and Kaminer, B. (1994). Calcium binding properties of  
1186 rabbit liver protein disulfide isomerase. *Biochem Biophys Res Commun* 202, 556-561.
- 1187 41. Liebschner, D., Afonine, P.V., Baker, M.L., Bunkoczi, G., Chen, V.B., Croll, T.I.,  
1188 Hintze, B., Hung, L.W., Jain, S., McCoy, A.J., *et al.* (2019). Macromolecular structure  
1189 determination using X-rays, neutrons and electrons: recent developments in Phenix.  
1190 *Acta Crystallogr D Struct Biol* 75, 861-877.
- 1191 42. Liebschner, D., Afonine, P.V., Moriarty, N.W., Poon, B.K., Sobolev, O.V., Terwilliger,  
1192 T.C., and Adams, P.D. (2017). Polder maps: improving OMIT maps by excluding bulk  
1193 solvent. *Acta Crystallographica Section D* 73, 148-157.
- 1194 43. Lievremont, J.P., Rizzuto, R., Hendershot, L., and Meldolesi, J. (1997). BiP, a major  
1195 chaperone protein of the endoplasmic reticulum lumen, plays a direct and important  
1196 role in the storage of the rapidly exchanging pool of Ca<sup>2+</sup>. *J Biol Chem* 272, 30873-  
1197 30879.
- 1198 44. Lippincott-Schwartz, J., Yuan, L.C., Bonifacino, J.S., and Klausner, R.D. (1989). Rapid  
1199 redistribution of Golgi proteins into the ER in cells treated with brefeldin A: evidence  
1200 for membrane cycling from Golgi to ER. *Cell* 56, 801-813.
- 1201 45. Lodish, H.F., and Kong, N. (1990). Perturbation of cellular calcium blocks exit of  
1202 secretory proteins from the rough endoplasmic reticulum. *J Biol Chem* 265, 10893-  
1203 10899.
- 1204 46. Lodish, H.F., Kong, N., and Wikstrom, L. (1992). Calcium is required for folding of  
1205 newly made subunits of the asialoglycoprotein receptor within the endoplasmic  
1206 reticulum. *J Biol Chem* 267, 12753-12760.
- 1207 47. Lucero, H.A., Lebeche, D., and Kaminer, B. (1994). ERcalcistorin/protein disulfide  
1208 isomerase (PDI). Sequence determination and expression of a cDNA clone encoding a  
1209 calcium storage protein with PDI activity from endoplasmic reticulum of the sea urchin  
1210 egg. *J Biol Chem* 269, 23112-23119.
- 1211 48. Macer, D.R., and Koch, G.L. (1988). Identification of a set of calcium-binding proteins  
1212 in reticuloplasm, the luminal content of the endoplasmic reticulum. *J Cell Sci* 91 (*Pt*  
1213 *1*), 61-70.
- 1214 49. Mayer, M., Reinstein, J., and Buchner, J. (2003). Modulation of the ATPase cycle of  
1215 BiP by peptides and proteins. *J Mol Biol* 330, 137-144.
- 1216 50. McCoy, A.J., Grosse-Kunstleve, R.W., Adams, P.D., Winn, M.D., Storoni, L.C., and  
1217 Read, R.J. (2007). Phaser crystallographic software. *J Appl Crystallogr* 40, 658-674.
- 1218 51. Meldolesi, J., and Pozzan, T. (1998). The endoplasmic reticulum Ca<sup>2+</sup> store: a view  
1219 from the lumen. *Trends Biochem Sci* 23, 10-14.
- 1220 52. Misselwitz, B., Staeck, O., and Rapoport, T.A. (1998). J proteins catalytically activate  
1221 Hsp70 molecules to trap a wide range of peptide sequences. *Mol Cell* 2, 593-603.

- 1222 53. Munro, S., and Pelham, H.R. (1986). An Hsp70-like protein in the ER: identity with  
1223 the 78 kd glucose-regulated protein and immunoglobulin heavy chain binding protein.  
1224 *Cell* 46, 291-300.
- 1225 54. Paton, A.W., Beddoe, T., Thorpe, C.M., Whisstock, J.C., Wilce, M.C., Rossjohn, J.,  
1226 Talbot, U.M., and Paton, J.C. (2006). AB5 subtilase cytotoxin inactivates the  
1227 endoplasmic reticulum chaperone BiP. *Nature* 443, 548-552.
- 1228 55. Pena, F., Jansens, A., van Zadelhoff, G., and Braakman, I. (2010). Calcium as a crucial  
1229 cofactor for low density lipoprotein receptor folding in the endoplasmic reticulum. *J*  
1230 *Biol Chem* 285, 8656-8664.
- 1231 56. Perera, L.A., Rato, C., Yan, Y., Neidhardt, L., McLaughlin, S.H., Read, R.J., Preissler,  
1232 S., and Ron, D. (2019). An oligomeric state-dependent switch in the ER enzyme FICD  
1233 regulates AMPylation and deAMPylation of BiP. *EMBO J*, e102177.
- 1234 57. Pettersen, E.F., Goddard, T.D., Huang, C.C., Couch, G.S., Greenblatt, D.M., Meng,  
1235 E.C., and Ferrin, T.E. (2004). UCSF Chimera--a visualization system for exploratory  
1236 research and analysis. *J Comput Chem* 25, 1605-1612.
- 1237 58. Polier, S., Dragovic, Z., Hartl, F.U., and Bracher, A. (2008). Structural basis for the  
1238 cooperation of Hsp70 and Hsp110 chaperones in protein folding. *Cell* 133, 1068-1079.
- 1239 59. Preissler, S., Chambers, J.E., Crespillo-Casado, A., Avezov, E., Miranda, E., Perez, J.,  
1240 Hendershot, L.M., Harding, H.P., and Ron, D. (2015). Physiological modulation of BiP  
1241 activity by trans-protomer engagement of the interdomain linker. *Elife* 4, e08961.
- 1242 60. Preissler, S., Rohland, L., Yan, Y., Chen, R., Read, R.J., and Ron, D. (2017).  
1243 AMPylation targets the rate-limiting step of BiP's ATPase cycle for its functional  
1244 inactivation. *Elife* 6.
- 1245 61. Raffaello, A., Mammucari, C., Gherardi, G., and Rizzuto, R. (2016). Calcium at the  
1246 Center of Cell Signaling: Interplay between Endoplasmic Reticulum, Mitochondria,  
1247 and Lysosomes. *Trends Biochem Sci* 41, 1035-1049.
- 1248 62. Sagara, Y., and Inesi, G. (1991). Inhibition of the sarcoplasmic reticulum Ca<sup>2+</sup>  
1249 transport ATPase by thapsigargin at subnanomolar concentrations. *J Biol Chem* 266,  
1250 13503-13506.
- 1251 63. Sans, M.D., Kimball, S.R., and Williams, J.A. (2002). Effect of CCK and intracellular  
1252 calcium to regulate eIF2B and protein synthesis in rat pancreatic acinar cells. *Am J*  
1253 *Physiol Gastrointest Liver Physiol* 282, G267-276.
- 1254 64. Satpute-Krishnan, P., Ajinkya, M., Bhat, S., Itakura, E., Hegde, R.S., and Lippincott-  
1255 Schwartz, J. (2014). ER stress-induced clearance of misfolded GPI-anchored proteins  
1256 via the secretory pathway. *Cell* 158, 522-533.
- 1257 65. Sekijima, Y., Wiseman, R.L., Matteson, J., Hammarstrom, P., Miller, S.R., Sawkar,  
1258 A.R., Balch, W.E., and Kelly, J.W. (2005). The biological and chemical basis for tissue-  
1259 selective amyloid disease. *Cell* 121, 73-85.
- 1260 66. Sekine, Y., Zyryanova, A., Crespillo-Casado, A., Amin-Wetzel, N., Harding, H.P., and  
1261 Ron, D. (2016). Paradoxical Sensitivity to an Integrated Stress Response Blocking  
1262 Mutation in Vanishing White Matter Cells. *PLoS One* 11, e0166278.
- 1263 67. Shen, J., Chen, X., Hendershot, L., and Prywes, R. (2002). ER stress regulation of ATF6  
1264 localization by dissociation of BiP/GRP78 binding and unmasking of Golgi localization  
1265 signals. *Dev Cell* 3, 99-111.
- 1266 68. Solovyova, N., and Verkhratsky, A. (2002). Monitoring of free calcium in the neuronal  
1267 endoplasmic reticulum: an overview of modern approaches. *J Neurosci Methods* 122,  
1268 1-12.
- 1269 69. Strayle, J., Pozzan, T., and Rudolph, H.K. (1999). Steady-state free Ca<sup>2+</sup> in the yeast  
1270 endoplasmic reticulum reaches only 10 microM and is mainly controlled by the  
1271 secretory pathway pump pmr1. *EMBO J* 18, 4733-4743.



- 1272 70. Suzuki, C.K., Bonifacino, J.S., Lin, A.Y., Davis, M.M., and Klausner, R.D. (1991).  
1273 Regulating the retention of T-cell receptor alpha chain variants within the endoplasmic  
1274 reticulum: Ca(2+)-dependent association with BiP. *J Cell Biol* 114, 189-205.
- 1275 71. Thastrup, O., Cullen, P.J., Drobak, B.K., Hanley, M.R., and Dawson, A.P. (1990).  
1276 Thapsigargin, a tumor promoter, discharges intracellular Ca<sup>2+</sup> stores by specific  
1277 inhibition of the endoplasmic reticulum Ca<sup>2+</sup>(+)-ATPase. *Proc Natl Acad Sci U S A* 87,  
1278 2466-2470.
- 1279 72. Theyssen, H., Schuster, H.P., Packschies, L., Bukau, B., and Reinstein, J. (1996). The  
1280 second step of ATP binding to DnaK induces peptide release. *J Mol Biol* 263, 657-670.
- 1281 73. Thomas, A.P., Bird, G.S., Hajnoczky, G., Robb-Gaspers, L.D., and Putney, J.W., Jr.  
1282 (1996). Spatial and temporal aspects of cellular calcium signaling. *Faseb J* 10, 1505-  
1283 1517.
- 1284 74. Van, P.N., Peter, F., and Soling, H.D. (1989). Four intracisternal calcium-binding  
1285 glycoproteins from rat liver microsomes with high affinity for calcium. No indication  
1286 for calsequestrin-like proteins in inositol 1,4,5-trisphosphate-sensitive calcium  
1287 sequestering rat liver vesicles. *J Biol Chem* 264, 17494-17501.
- 1288 75. Vishnu, N., Jadoon Khan, M., Karsten, F., Groschner, L.N., Waldeck-Weiermair, M.,  
1289 Rost, R., Hallstrom, S., Imamura, H., Graier, W.F., and Malli, R. (2014). ATP increases  
1290 within the lumen of the endoplasmic reticulum upon intracellular Ca<sup>2+</sup> release. *Mol*  
1291 *Biol Cell* 25, 368-379.
- 1292 76. Wada, I., Rindress, D., Cameron, P.H., Ou, W.J., Doherty, J.J., 2nd, Louvard, D., Bell,  
1293 A.W., Dignard, D., Thomas, D.Y., and Bergeron, J.J. (1991). SSR alpha and associated  
1294 calnexin are major calcium binding proteins of the endoplasmic reticulum membrane.  
1295 *J Biol Chem* 266, 19599-19610.
- 1296 77. Wall, D., Zylicz, M., and Georgopoulos, C. (1994). The NH<sub>2</sub>-terminal 108 amino acids  
1297 of the Escherichia coli DnaJ protein stimulate the ATPase activity of DnaK and are  
1298 sufficient for lambda replication. *J Biol Chem* 269, 5446-5451.
- 1299 78. Walter, P., and Ron, D. (2011). The unfolded protein response: from stress pathway to  
1300 homeostatic regulation. *Science* 334, 1081-1086.
- 1301 79. Wei, J., and Hendershot, L.M. (1995). Characterization of the nucleotide binding  
1302 properties and ATPase activity of recombinant hamster BiP purified from bacteria. *J*  
1303 *Biol Chem* 270, 26670-26676.
- 1304 80. Weitzmann, A., Baldes, C., Dudek, J., and Zimmermann, R. (2007). The heat shock  
1305 protein 70 molecular chaperone network in the pancreatic endoplasmic reticulum - a  
1306 quantitative approach. *Febs J* 274, 5175-5187.
- 1307 81. Welch, W.J., Garrels, J.I., Thomas, G.P., Lin, J.J., and Feramisco, J.R. (1983).  
1308 Biochemical characterization of the mammalian stress proteins and identification of  
1309 two stress proteins as glucose- and Ca<sup>2+</sup>-ionophore-regulated proteins. *J Biol Chem*  
1310 258, 7102-7111.
- 1311 82. Winn, M.D., Ballard, C.C., Cowtan, K.D., Dodson, E.J., Emsley, P., Evans, P.R.,  
1312 Keegan, R.M., Krissinel, E.B., Leslie, A.G.W., McCoy, A., *et al.* (2011). Overview of  
1313 the CCP4 suite and current developments. *Acta Crystallographica Section D* 67, 235-  
1314 242.
- 1315 83. Winn, M.D., Isupov, M.N., and Murshudov, G.N. (2001). Use of TLS parameters to  
1316 model anisotropic displacements in macromolecular refinement. *Acta Crystallogr D*  
1317 *Biol Crystallogr* 57, 122-133.
- 1318 84. Winter, G. (2010). xia2: an expert system for macromolecular crystallography data  
1319 reduction. *Journal of Applied Crystallography* 43, 186-190.
- 1320 85. Wisniewska, M., Karlberg, T., Lehtio, L., Johansson, I., Kotenyova, T., Moche, M.,  
1321 and Schuler, H. (2010). Crystal structures of the ATPase domains of four human Hsp70

- 1322 isoforms: HSPA1L/Hsp70-hom, HSPA2/Hsp70-2, HSPA6/Hsp70B', and  
1323 HSPA5/BiP/GRP78. PLoS One 5, e8625.
- 1324 86. Wong, W.L., Brostrom, M.A., Kuznetsov, G., Gmitter-Yellen, D., and Brostrom, C.O.  
1325 (1993). Inhibition of protein synthesis and early protein processing by thapsigargin in  
1326 cultured cells. Biochem J 289 (Pt 1), 71-79.
- 1327 87. Wu, F.S., Park, Y.C., Roufa, D., and Martonosi, A. (1981). Selective stimulation of the  
1328 synthesis of an 80,000-dalton protein by calcium ionophores. J Biol Chem 256, 5309-  
1329 5312.
- 1330 88. Yang, J., Zong, Y., Su, J., Li, H., Zhu, H., Columbus, L., Zhou, L., and Liu, Q. (2017).  
1331 Conformation transitions of the polypeptide-binding pocket support an active substrate  
1332 release from Hsp70s. Nat Commun 8, 1201.
- 1333 89. Yong, J., Bischof, H., Burgstaller, S., Siirin, M., Murphy, A., Malli, R., and Kaufman,  
1334 R.J. (2019). Mitochondria supply ATP to the ER through a mechanism antagonized by  
1335 cytosolic Ca(2). Elife 8.
- 1336 90. Zheng, H., Cooper, D.R., Porebski, P.J., Shabalin, I.G., Handing, K.B., and Minor, W.  
1337 (2017). CheckMyMetal: a macromolecular metal-binding validation tool. Acta  
1338 Crystallographica Section D 73, 223-233.
- 1339

## Figure 1

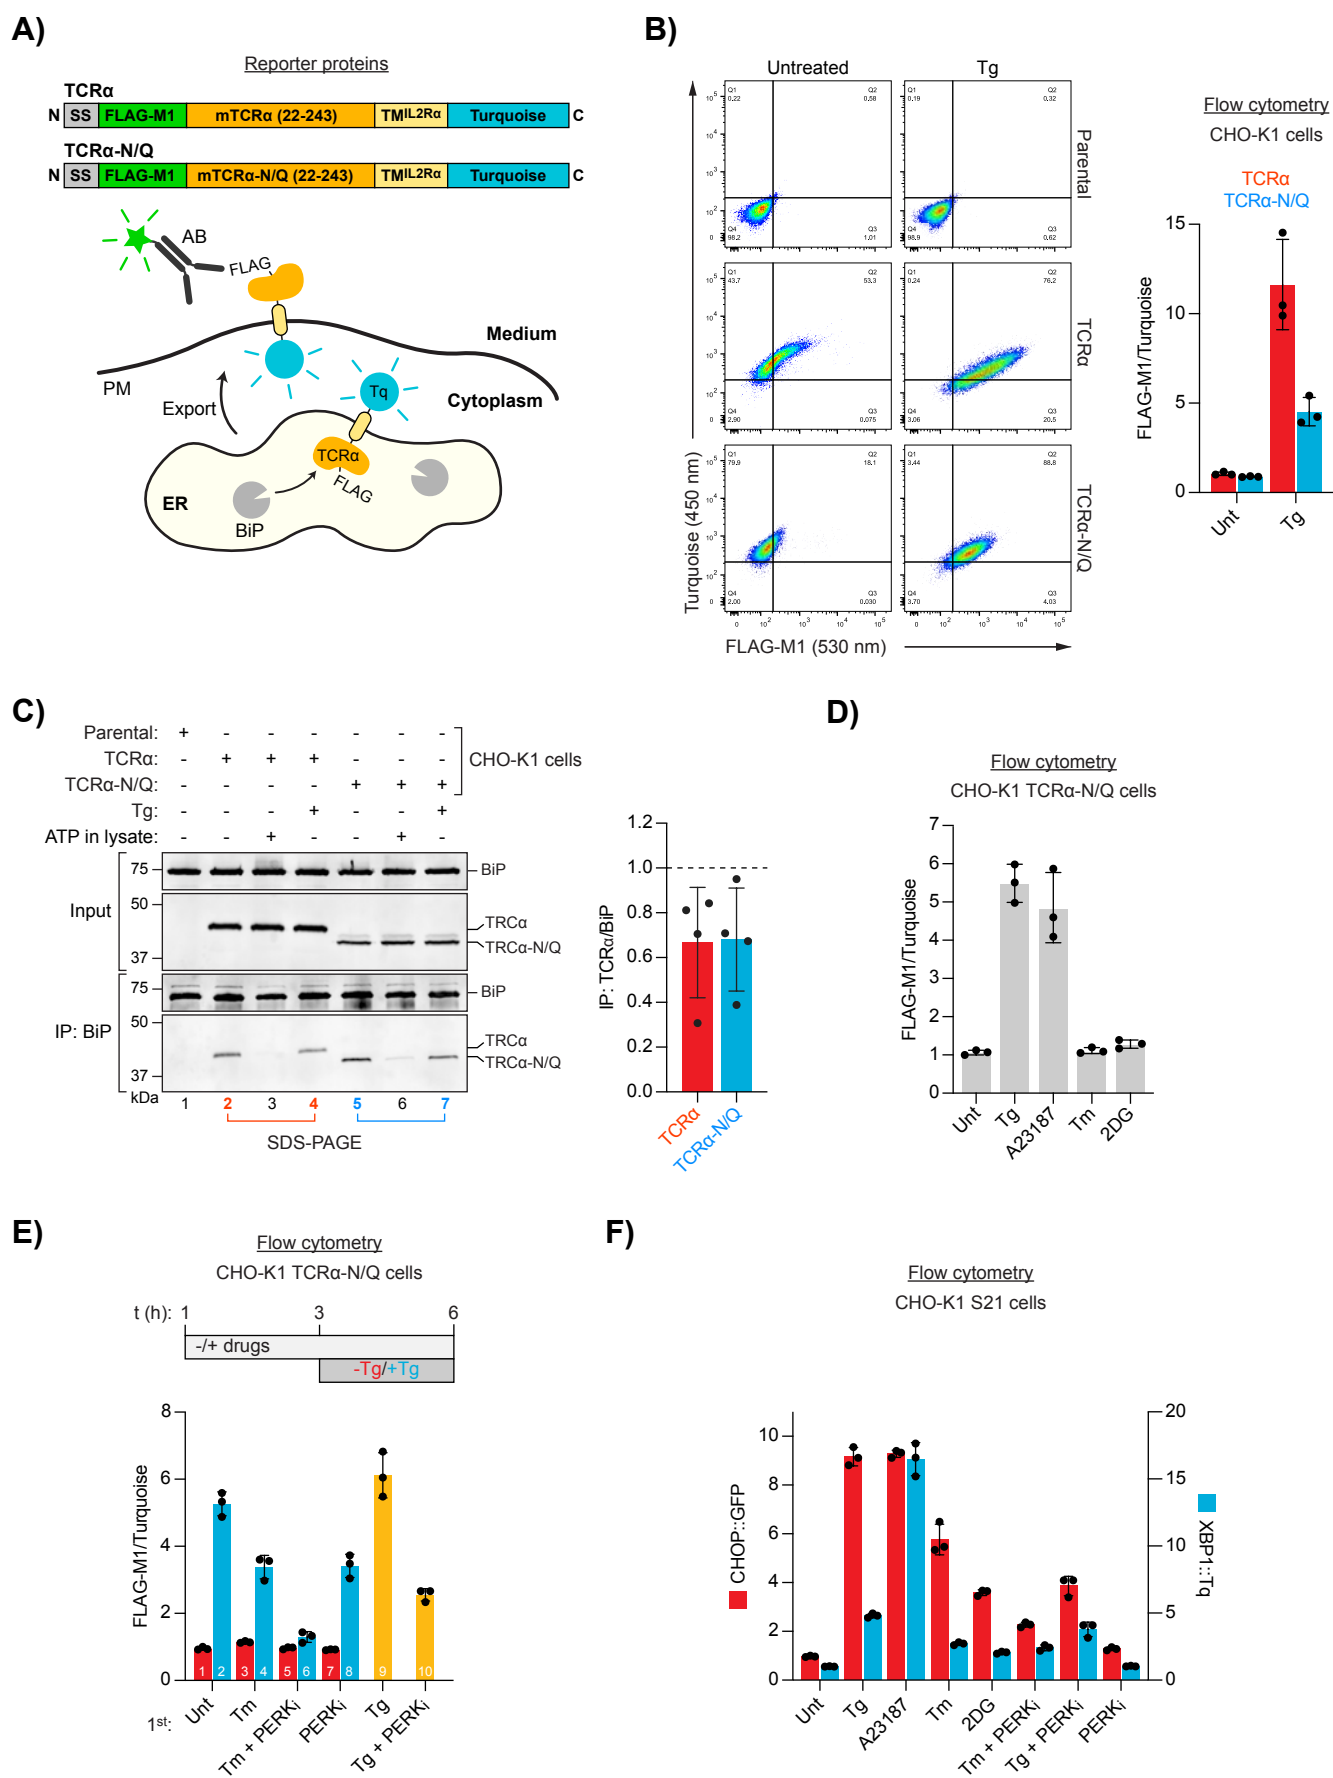

## Figure 1

### ER Ca<sup>2+</sup> depletion-dependent trafficking of TCR $\alpha$ -based reporter proteins

**A)** Schematic representation of reporter proteins and detection principles. Signal sequence (SS); FLAG-M1 epitope tag; mouse T-cell antigen receptor  $\alpha$  chain (mTCR $\alpha$ ); transmembrane domain of the interleukin 2 receptor  $\alpha$  subunit (TM<sup>IL2R $\alpha$</sup> ); monomeric Turquoise (Tq); endoplasmic reticulum (ER); plasma membrane (PM).

**B)** Flow cytometry analysis of TCR $\alpha$  cell surface exposure. CHO-K1 cell lines stably expressing TCR $\alpha$  or glycosylation-deficient TCR $\alpha$ -N/Q were left untreated or exposed to Thapsigargin (Tg) for 3 h before analysis. Dot plots of a representative experiment are shown. Graph: reporter surface exposure is plotted as the ratio between the FLAG-M1 and Turquoise median fluorescence signal (relative to a data point of TCR $\alpha$  in untreated cells arbitrarily set to 1). Bars represent mean  $\pm$  SD from three independent experiments.

**C)** Co-immunoprecipitation (IP) of TCR $\alpha$  reporter proteins with BiP from stable CHO-K1 cell lines (as in 'B') analysed by SDS-PAGE and immunoblotting. Where indicated cells were treated with Tg for 3 h prior to lysis. ATP was depleted from samples during lysis to stabilise BiP-substrate interactions except from the sample marked with 'ATP' to which additional ATP was added instead. Graph: ratios of the quantified blot signals relative to untreated samples (set to 1; dashed line). Bars represent mean  $\pm$  SD from four independent experiments.

**D-E)** Flow cytometry analysis as in 'B'. **(D)** Cells were treated for 3 h, as indicated, before analysis [tunicamycin (Tm); 2-deoxyglucose (2DG)]. **(E)** Cells were exposed to the compounds indicated. After 3 h the medium was replaced by medium containing the same compounds without (red) or with additional Tg (blue) for further 3 h before analysis. Samples 9 and 10 (yellow bars) contained the same amount of Tg before and after medium exchange. PERK inhibitor (PERK<sub>i</sub>). Bars: mean  $\pm$  SD from three independent experiments.

**F)** Flow cytometry analysis of a UPR reporter CHO-K1 cell line (S21) carrying a predominantly PERK-controlled CHOP::GFP marker and a predominantly IRE1-controlled XBP1::Turquoise marker. The cells were treated for 6 h, as indicated. Median fluorescence signals relative to untreated cells are shown. Bars: mean  $\pm$  SD from three independent experiments.

## Figure 1-figure supplement 1

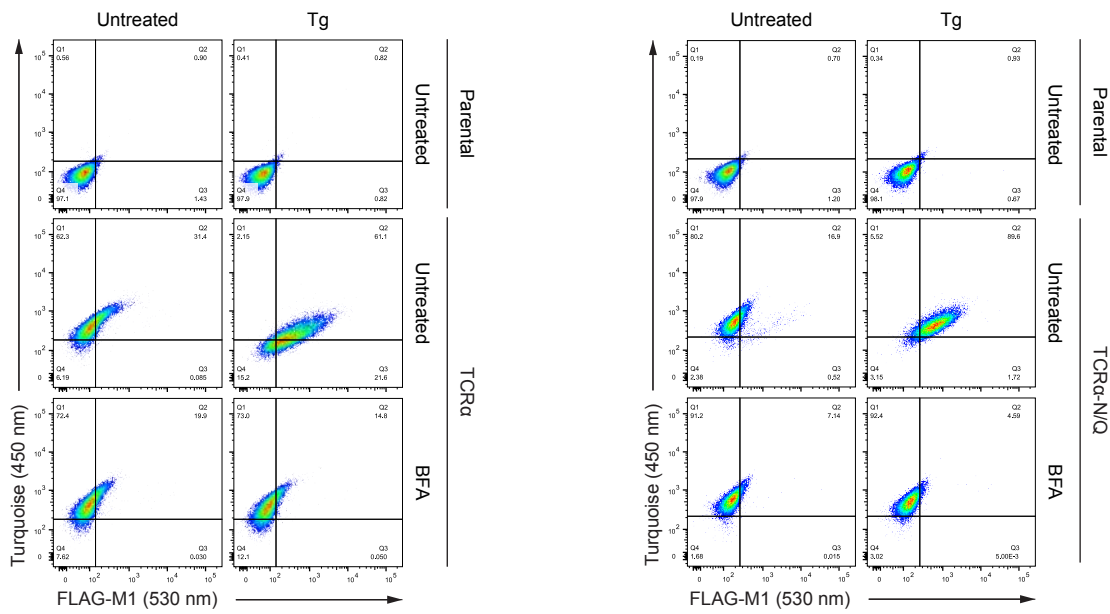

## Figure 1-figure supplement 1

### Brefeldin A blocks exposure of the TCR $\alpha$ reporter on the cell surface

Dot plots of a representative flow cytometry analysis of CHO-K1 cells stably expressing TCR $\alpha$  or TCR $\alpha$ -N/Q after treatment with Thapsigargin (Tg) and brefeldin A (BFA) for 3 h, as indicated.

## Figure 1-figure supplement 2

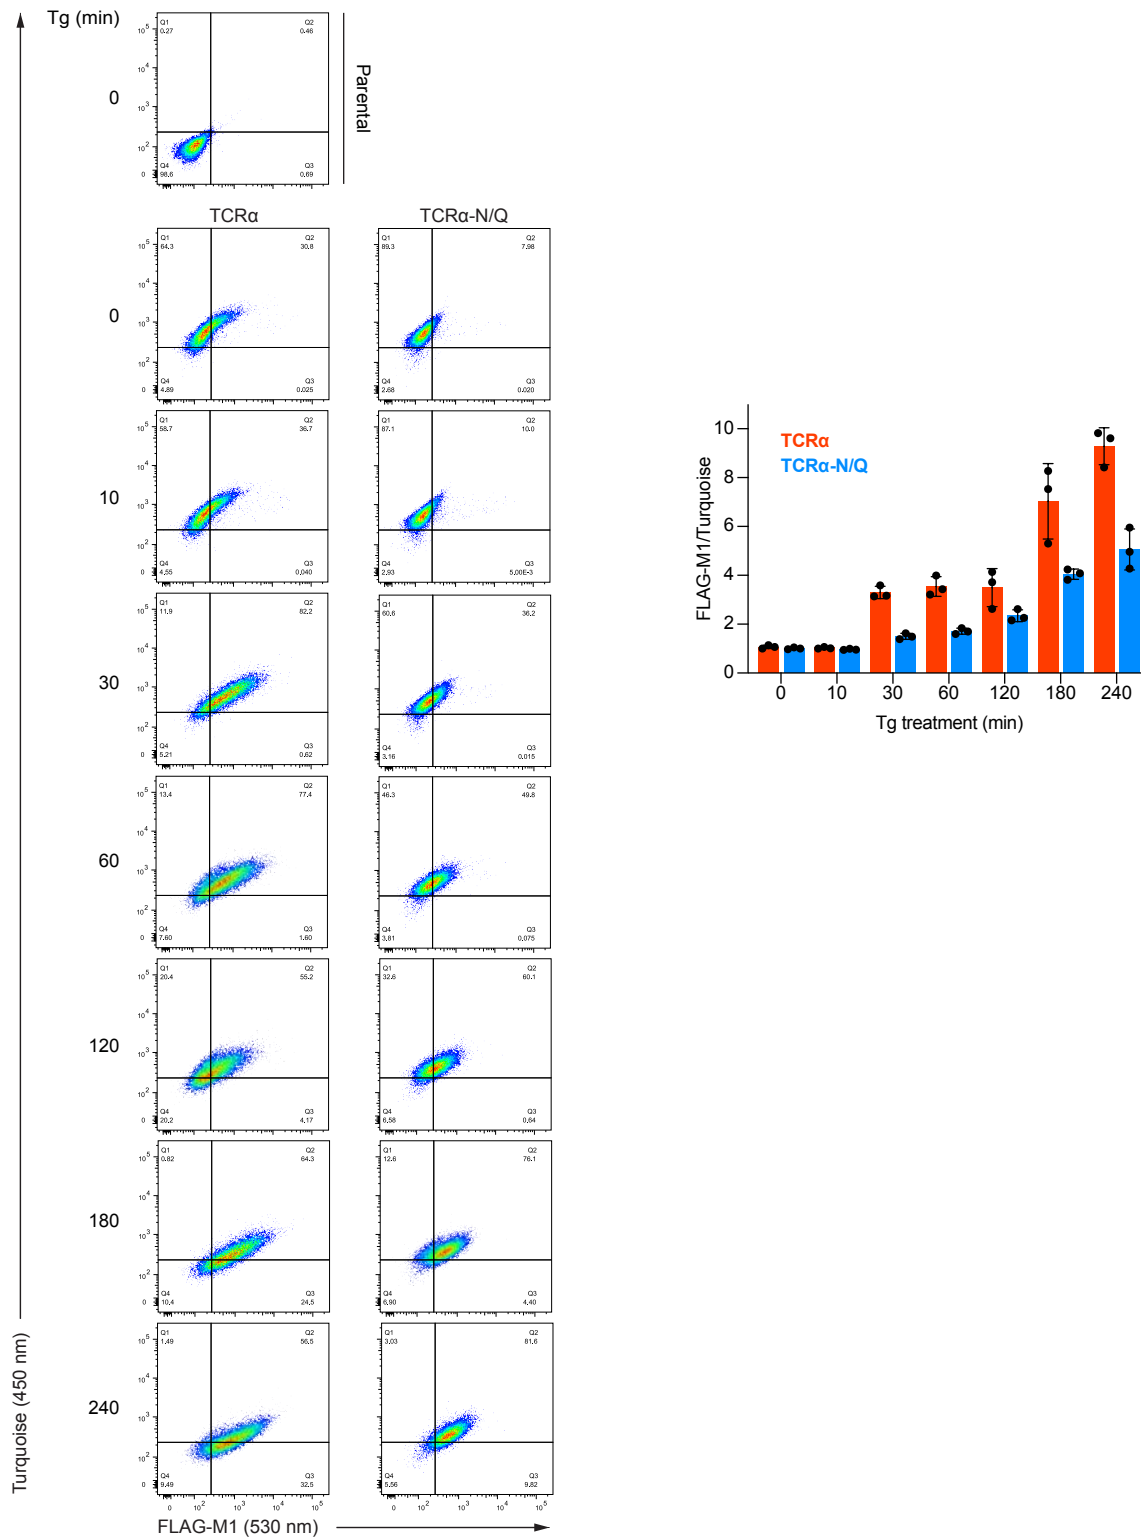



## Figure 1-figure supplement 2

### Time course of exposure of the TCR $\alpha$ reporter on the cell surface during ER Ca<sup>2+</sup> depletion

Dot plots of a representative flow cytometry analysis of CHO-K1 cells stably expressing TCR $\alpha$  or TCR $\alpha$ -N/Q after treatment with Thapsigargin (Tg) for indicated periods. Graph: reporter surface exposure is given as the ratio between the FLAG-M1 and Turquoise median fluorescence signal relative to untreated cells. Bars: mean  $\pm$  SD bars are shown from three independent experiments.

## Figure 1-figure supplement 3

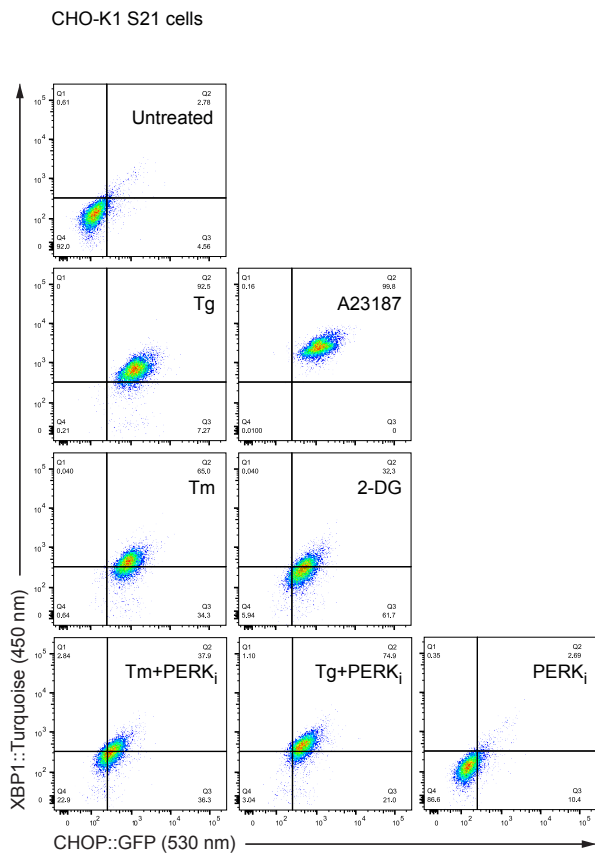

### Figure 1-figure supplement 3

#### ER Ca<sup>2+</sup> depletion and ER stress induce the UPR

Dot plots of a representative flow cytometry experiment using CHO-K1 CHOP::GFP XBP1::Tq cells (S21). The cells were treated for 6 h, as indicated. Related to **Figure 1F**.

## Figure 2

A)

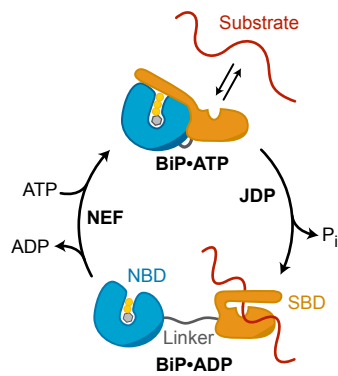

B)

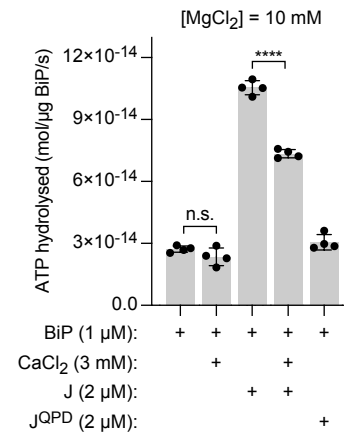

C)

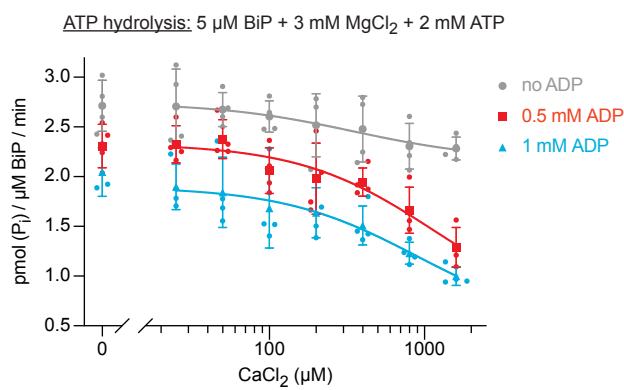

## Figure 2

### Effect of Ca<sup>2+</sup> on BiP's ATPase activity

**A)** Schematic representation of BiP's chaperone cycle. Unfolded substrate protein (red); nucleotide binding domain (NBD); substrate binding domain (SBD); interdomain linker (grey); orthophosphate (P<sub>i</sub>); J-domain protein (JDP); nucleotide exchange factor (NEF).

**B)** ATP hydrolysis by purified BiP measured with a NADH-based ATPase assay. All samples contained 10 mM MgCl<sub>2</sub> and 1 μM BiP. Where indicated CaCl<sub>2</sub> (3 mM) and wildtype (J) or mutant J-domain (J<sup>QPD</sup>) were added (both at 2 μM). Bars: mean ± SD from four independent experiments. \*\*\*\*  $p < 0.0001$ , 95% CI  $-3.672e^{-14}$  to  $-2.695e^{-14}$ , two-tailed, unpaired, parametric *t*-test.

**C)** ATPase activity of BiP measured by detection of ATP hydrolysis product (P<sub>i</sub>) accumulation using a malachite green-based assay. All samples contained 3 mM MgCl<sub>2</sub> and 2 mM ATP. CaCl<sub>2</sub> was titrated (0 - 1.6 mM). Where indicated samples contained 0.5 mM (red) and 1 mM (blue) ADP. Bold symbols represent mean values ± SD derived from individual data points (staggered dots). Best-fit lines are shown.

## Figure 2-figure supplement 1

Preissler et al.

A)

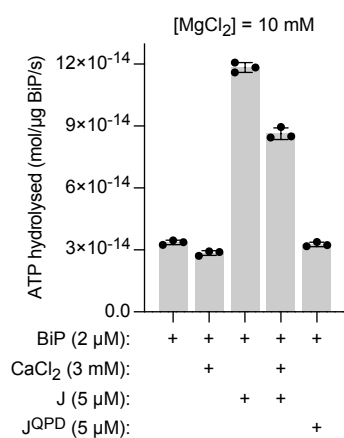

B)

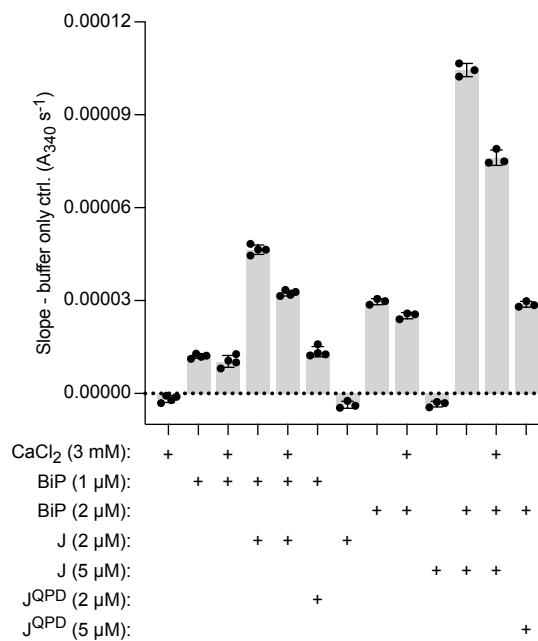

## Figure 2-figure supplement 1

### Effect of Ca<sup>2+</sup> on BiP's ATPase activity measured by a NADH-based assay

ATP hydrolysis by purified BiP measured with a NADH-based ATPase assay that detects ADP production. All samples contained 10 mM MgCl<sub>2</sub>. Where indicated CaCl<sub>2</sub> (3 mM) and wildtype or mutant J-domain (J; J<sup>QPD</sup>) were added.

(A) Same as **Figure 2B** but with higher protein concentrations. Bars: mean  $\pm$  SD from three independent experiments.

(B) Slopes of time-dependent NADH signals (absorbance at 340 nm; A<sub>340</sub>) of experiments shown in 'A' and **Figure 1B**. The value of the 'buffer only' control reaction was subtracted in each experiment. Bars: mean  $\pm$  SD from at least three independent experiments. Note: the reaction velocity correlates with the BiP concentration.



## Figure 3

Preissler et al.

A)

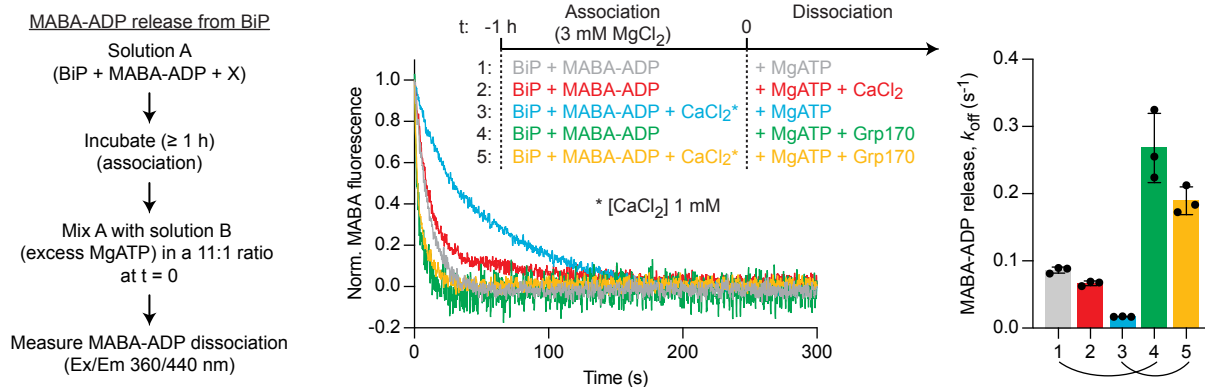

B)

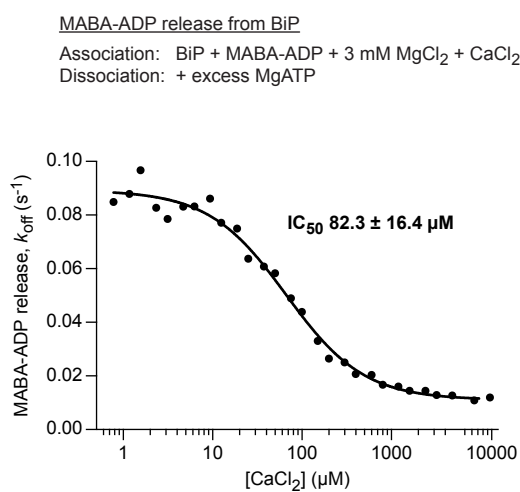

C)

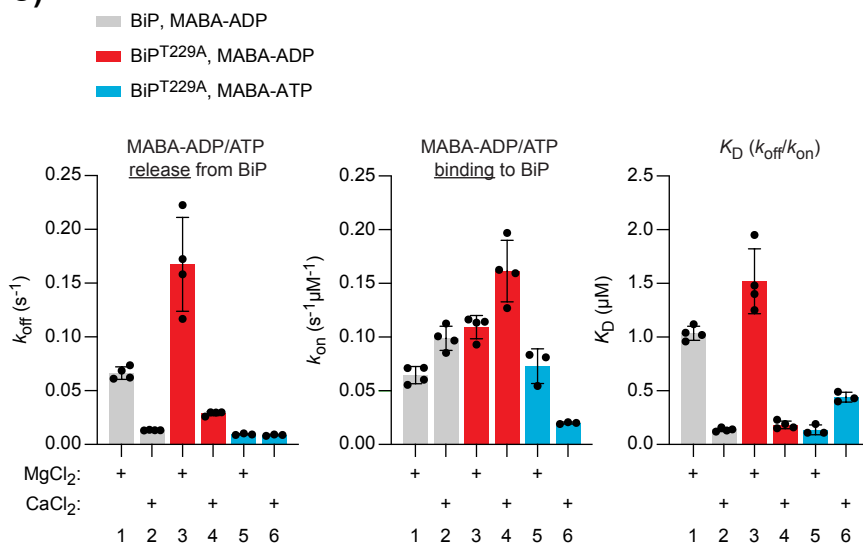

## Figure 3

### Differential effect of $\text{Ca}^{2+}$ on ATP and ADP binding to BiP

**A)** Representative plot of fluorescence against time of pre-formed complexes of MABA-ADP and BiP (each 1.3  $\mu\text{M}$ ) challenged at  $t = 0$  with excess of MgATP (1.5 mM) to reveal nucleotide release. All solutions contained 3 mM  $\text{MgCl}_2$ .  $\text{CaCl}_2$  (1 mM) and Grp170 (1.3  $\mu\text{M}$ ) were added at  $t = -1$  or  $t = 0$  as indicated. Graph: mean MABA-ADP dissociation rate constants ( $k_{\text{off}}$ )  $\pm$  SD from three independent experiments (the curved line connecting conditions 1 & 4 and 3 & 5 emphasises the effect of calcium on the activity of Grp170).

**B)** MABA-ADP dissociation rates from BiP plotted against  $[\text{CaCl}_2]$  of a representative experiment. The experiment was performed as in 'A'. All samples contained  $\text{MgCl}_2$  (3 mM).  $\text{CaCl}_2$  was present at increasing concentrations during nucleotide binding (solution A). The half maximal inhibitory concentration ( $\text{IC}_{50}$ ) of  $\text{CaCl}_2$  (mean  $\pm$  SD) was calculated from three independent experiments.

**C)** Effect of  $\text{Ca}^{2+}$  on affinities of nucleotides for BiP. The dissociation rates of MABA-ADP and MABA-ATP from wildtype or ATPase-impaired T229A mutant BiP were measured as in 'A', whereby either  $\text{MgCl}_2$  or  $\text{CaCl}_2$  (1 mM) were present throughout the experiment (solutions A and B). The association rate constants ( $k_{\text{on}}$ ) were measured upon addition of MABA-labelled nucleotides to BiP in presence of either divalent cation. The dissociation constants ( $K_{\text{D}}$ ) were calculated based on the rate constants ( $k_{\text{off}}/k_{\text{on}}$ ). Nucleotide-free proteins were used. Bars: mean  $\pm$  SD. All the data points from  $\geq 3$  independent experiments are shown.

## Figure 3-figure supplement 1

Preissler et al.

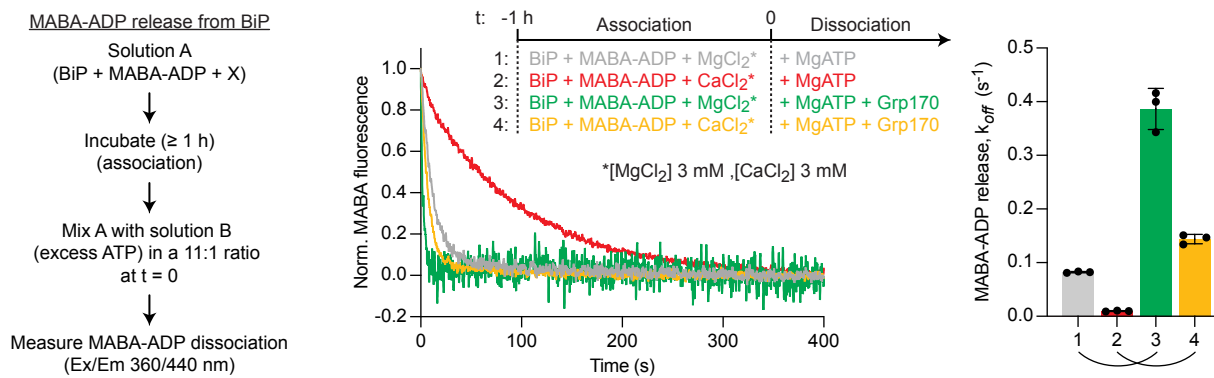

## Figure 3-figure supplement 1

### Dissociation BiP•MABA-ADP complexes formed in presence of either Mg<sup>2+</sup> or Ca<sup>2+</sup>

Representative plot of fluorescence against time of complexes of MABA-ADP and BiP (each 1.3 μM) formed in presence of either MgCl<sub>2</sub> or CaCl<sub>2</sub> (each 3 mM). Excess of MgATP (1.5 mM) without or with Grp170 (1.3 μM) was added at t = 0 to reveal nucleotide release. Graph: mean MABA-ADP dissociation rate constants ( $k_{\text{off}}$ ) ± SD from three independent experiments. Final concentrations after mixing are given. Note: the stronger stimulatory effect of Grp170 compared to **Figure 3A** may be due to variations in the experimental conditions.

## Figure 4

Preissler et al.

A)

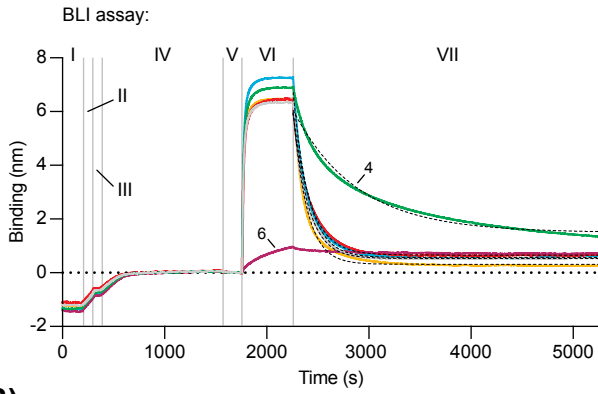

Steps: I. Sensor equilibration  
 II. J or JQPD loading  
 III. Wash  
 IV. P15 peptide loading  
 V. Baseline  
 VI. BiP association  
 VII. BiP dissociation

VI. Association (BiP +) VII. Dissociation

- |   |                                             |                                             |
|---|---------------------------------------------|---------------------------------------------|
| 1 | MgCl <sub>2</sub> + ATP                     | MgCl <sub>2</sub> + ATP                     |
| 2 | MgCl <sub>2</sub> + CaCl <sub>2</sub> + ATP | MgCl <sub>2</sub> + ATP                     |
| 3 | MgCl <sub>2</sub> + ATP                     | MgCl <sub>2</sub> + CaCl <sub>2</sub> + ATP |
| 4 | MgCl <sub>2</sub> + ATP                     | MgCl <sub>2</sub> + ADP                     |
| 5 | MgCl <sub>2</sub> + ATP                     | CaCl <sub>2</sub> + ATP                     |
| 6 | MgCl <sub>2</sub> + ATP (JQPD)              | MgCl <sub>2</sub> + ATP                     |

Conc. 1.5 mM ATP, 1.5 mM ADP,  
 3 mM MgCl<sub>2</sub>, 1 mM CaCl<sub>2</sub>

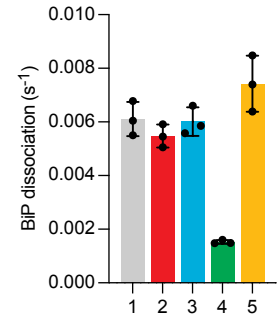

B)

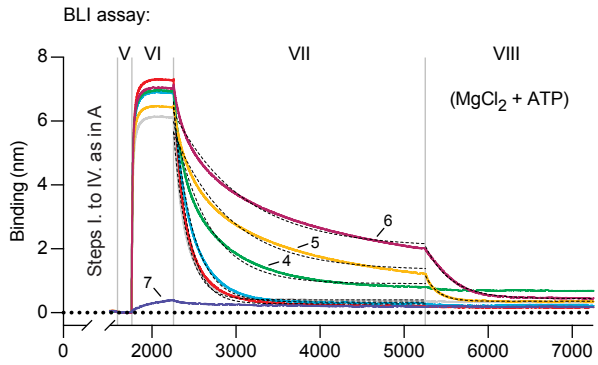

VI. Association: BiP + MgCl<sub>2</sub> + ATP

VII. Dissociation

- |   |                                                   |
|---|---------------------------------------------------|
| 1 | MgCl <sub>2</sub> + ATP                           |
| 2 | MgCl <sub>2</sub> + CaCl <sub>2</sub> + ATP       |
| 3 | MgCl <sub>2</sub> + ATP + ADP                     |
| 4 | MgCl <sub>2</sub> + CaCl <sub>2</sub> + ATP + ADP |
| 5 | MgCl <sub>2</sub> + ADP                           |
| 6 | CaCl <sub>2</sub> + ADP                           |
| 7 | MgCl <sub>2</sub> + ATP (JQPD)                    |

Conc. 1.5 mM ATP, 0.75 mM ADP,  
 3 mM MgCl<sub>2</sub>, 1 mM CaCl<sub>2</sub>

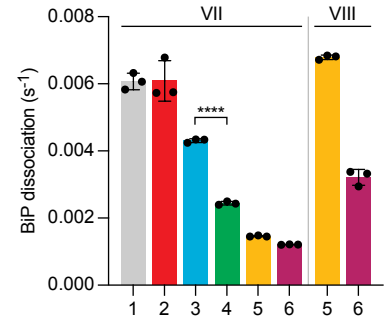

## Figure 4

### Ca<sup>2+</sup> affects ATP-dependent dissociation of substrates from BiP

**A-B)** A representative plot of the Bio-Layer interferometry (BLI) signal against time. The individual steps of the experiment (I-VII) are indicated: following an initial equilibration step (I) biotinylated wildtype or QPD mutant J-domain protein was immobilized corresponding to an interference signal difference of ~0.4 nm (II). After a wash step (III) the sensors were saturated with biotinylated P15 BiP substrate peptide (IV). After a stable baseline signal was established (V) the sensors were transferred into solutions containing BiP to measure association in presence of ATP (VI). Dissociation of BiP from the sensor was measured in protein-free solutions containing either ADP or ATP (VII). The composition of solutions in steps VI and VII as well as the concentrations of the variable components are indicated. **(A)** MgCl<sub>2</sub> and/or CaCl<sub>2</sub> were present where indicated. Dashed lines represent single exponential fit curves. Graph: mean dissociation rate constants ( $k_{\text{off}}$ )  $\pm$  SD from three independent experiments. **(B)** Same as ‘A’ but with identical solutions for all sensors in step VI and varying solution compositions in step VII. In the additional step (VIII) the sensors were introduced into solutions containing ATP and MgCl<sub>2</sub>. \*\*\*\*  $p < 0.0001$ , 95% CI -0.00198822 to -0.00174311, two-tailed, unpaired, parametric *t*-test.



## Figure 5

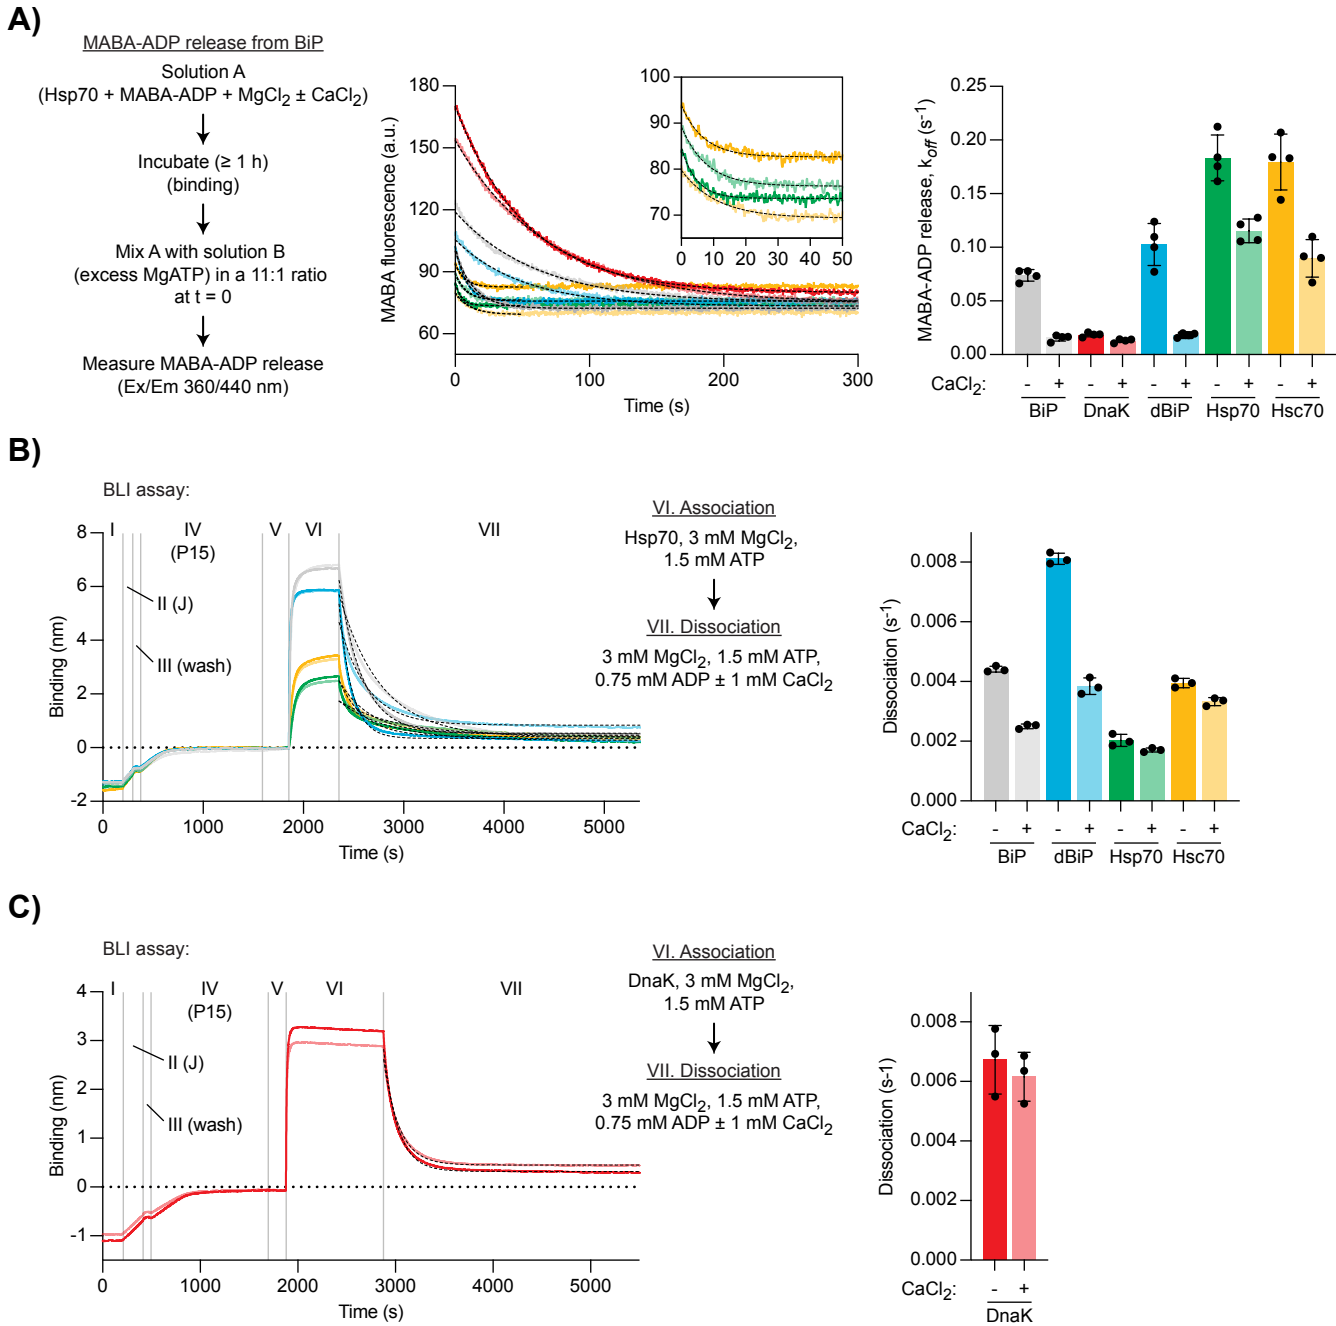

## Figure 5

### Ca<sup>2+</sup> selectively stabilises BiP•ADP compared with cytoplasmic Hsp70s

**A)** Representative plot of fluorescence against time of complexes of MABA-ADP and indicated full-length Hsp70 chaperones (each 1.3  $\mu$ M) formed without or with CaCl<sub>2</sub> (1 mM) (dBiP, *Drosophila* BiP). All solutions contained MgCl<sub>2</sub> (3 mM). Excess of MgATP (1.5 mM) was added at t = 0 to reveal MABA-ADP release. Final concentrations are given. Graph: mean MABA-ADP dissociation rate constants ( $k_{\text{off}}$ )  $\pm$  SD from four independent experiments.

**B-C)** A representative plot of the Bio-Layer interferometry (BLI) signal against time. The experiments were performed as in **Figure 4A** with the indicated Hsp70s. Dissociation of Hsp70s from the sensor was measured in protein-free solutions (VII). The composition of solutions in steps VI and VII as well as the concentrations of the variable components are indicated. **(B)** Analysis of eukaryotic Hsp70s. Dashed lines represent single exponential fit curves. Graph: mean dissociation rate constants ( $k_{\text{off}}$ )  $\pm$  SD from three independent experiments. **(C)** Same as ‘**B**’ but with *E. coli* DnaK.

## Figure 6

A)

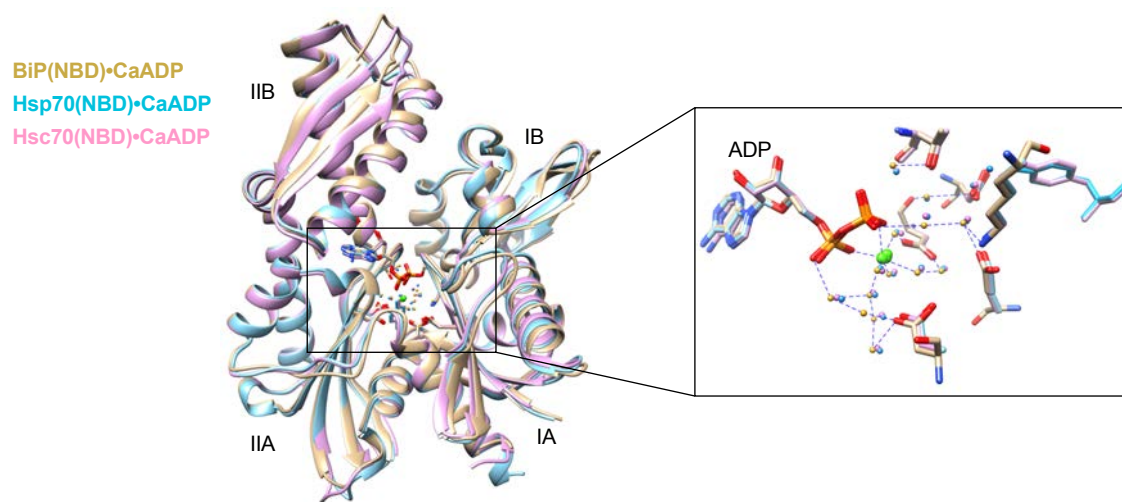

B)

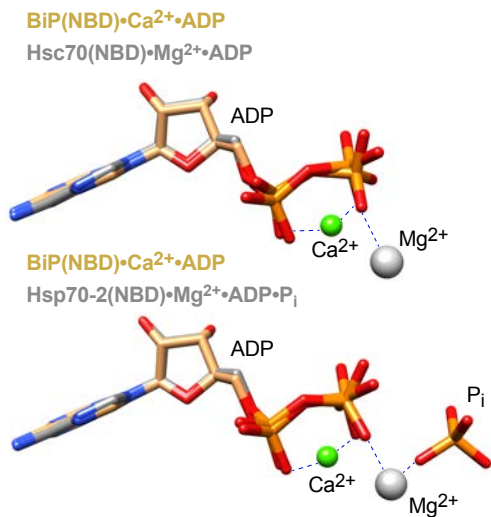

C)

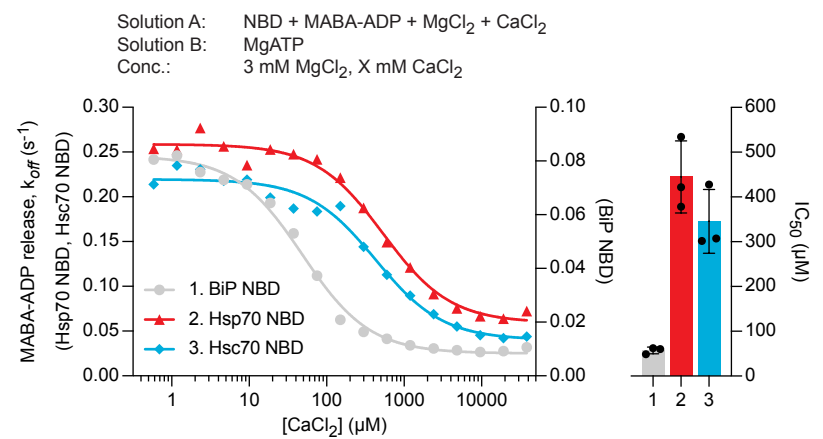

D)

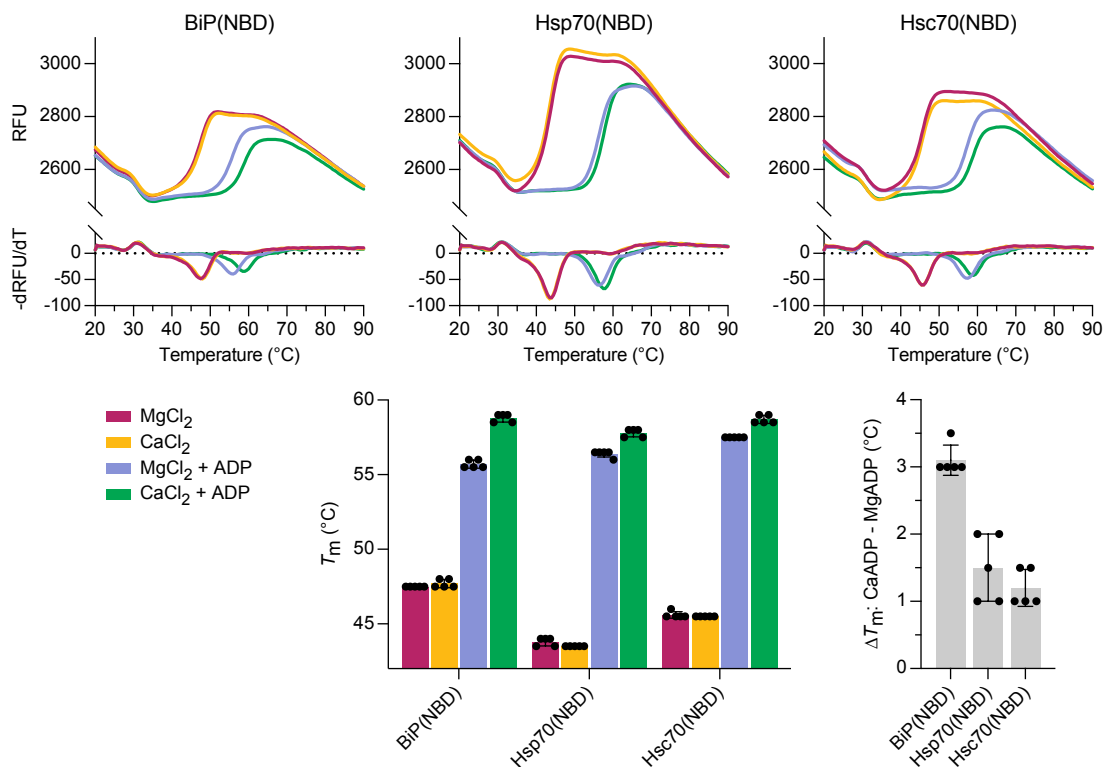

## Figure 6

### Structural analysis of $\text{Ca}^{2+}$ and ADP binding to Hsp70 nucleotide binding domains

**A)** Ribbon diagram of the aligned crystal structures of BiP (yellow), Hsp70 (blue) and Hsc70 (pink) nucleotide binding domains (NBD) in complex with  $\text{Ca}^{2+}$  and ADP. The subdomains IA-IIB are indicated. Inset: coordination of  $\text{Ca}^{2+}$  ions (green) by water (small spheres) and ADP in the nucleotide binding cleft.

**B)** Nucleotide and metal ion ligands of BiP(NBD)• $\text{Ca}^{2+}$ •ADP (as in ‘A’) and bovine Hsc70(NBD) • $\text{Mg}^{2+}$ •ADP (PDB 1BA1) or human Hsp70-2(NBD)• $\text{Mg}^{2+}$ •ADP• $\text{P}_i$  (PDB 3I33) based on nucleotide alignment. ADP, inorganic phosphate ( $\text{P}_i$ ),  $\text{Ca}^{2+}$  (green sphere), and  $\text{Mg}^{2+}$  (grey sphere) are shown.

**C)** MABA-ADP dissociation rates from the indicated NBDs plotted against  $[\text{CaCl}_2]$  of a representative experiment. The experiment was performed as in **Figure 3A**. All samples contained  $\text{MgCl}_2$  (3 mM).  $\text{CaCl}_2$  was present at increasing concentrations during NBD•MABA-ADP complex formation. Bars: the half maximal inhibitory concentration ( $\text{IC}_{50}$ ) of  $\text{CaCl}_2$  (mean  $\pm$  SD) was calculated from three independent experiments.

**D)** Melting temperatures ( $T_m$ ) of the indicated NBDs (at 5  $\mu\text{M}$ ) were measured by differential scanning fluorimetry (DSF) in presence of  $\text{MgCl}_2$  or  $\text{CaCl}_2$  (each 6 mM) without or with ADP (4 mM). Top: representative melt curves with their negative first derivatives (RFU, relative fluorescence units). Left bar graph: mean  $T_m \pm$  SD of three independent experiments. Right bar graph: difference in  $T_m$  ( $\Delta T_m$ ) between MgADP and CaADP containing samples.

## Figure 6-figure supplement 1

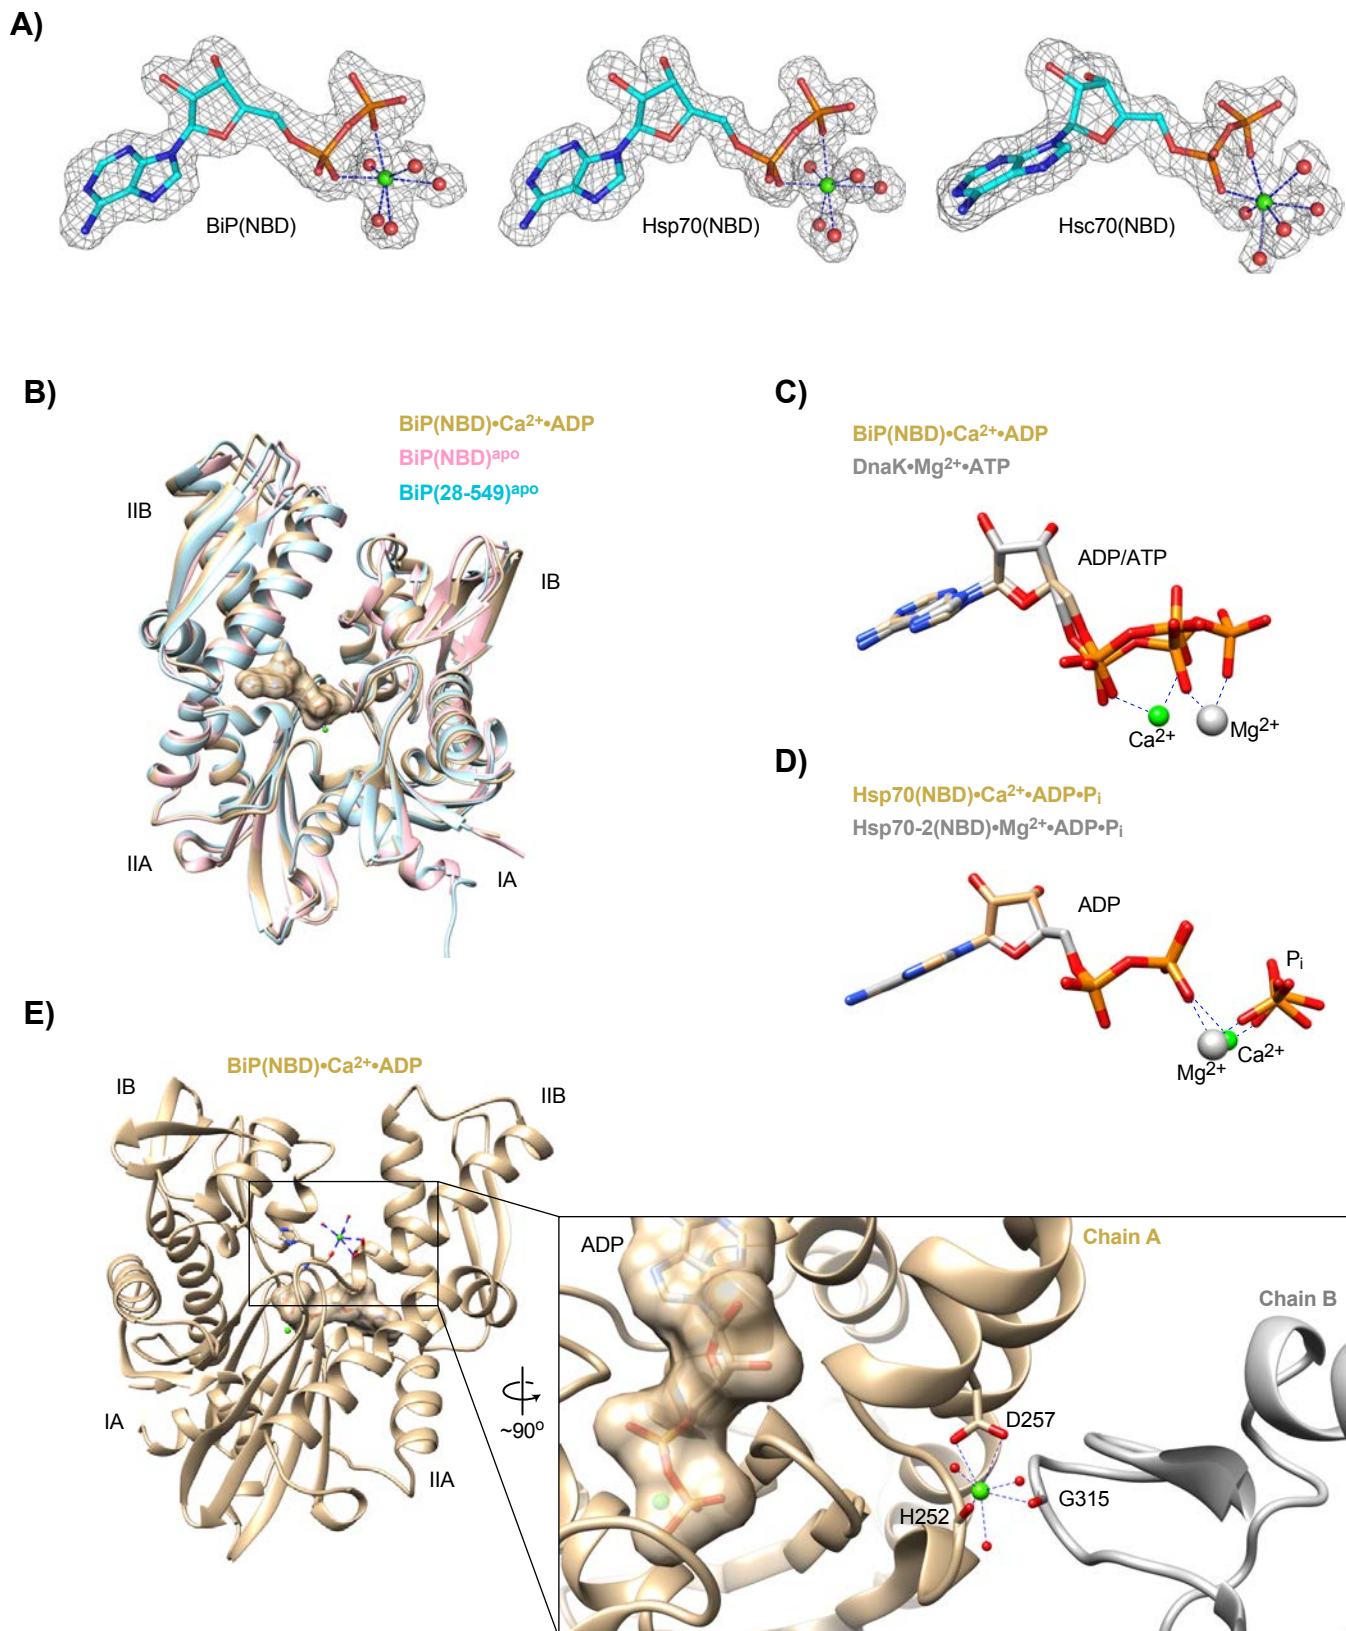



## Figure 6-figure supplement 1

### Structural details of nucleotide binding domains and their ligands

**A)** Polder OMIT maps (grey mesh) of BiP, Hsp70, and Hsc70 nucleotide binding domain (NBD) ligands omitting ADP (sticks),  $\text{Ca}^{2+}$  (green sphere), and water molecules (red spheres) contoured at 3.80 RMSD and including density within 1.6 Å of all atoms shown.

**B)** Ribbon diagram of NBDs of (i) BiP(NBD)• $\text{Ca}^{2+}$ •ADP aligned with (ii) BiP(NBD)<sup>apo</sup> (PDB 3LDN) (RMSD i vs. ii 0.75 over 336  $C_{\alpha}$ ) and (iii) BiP(28-549)<sup>apo</sup> (PDB 6HAB) (RMSD i vs. iii 0.776 over 311  $C_{\alpha}$ ). The nucleotide is shown in surface representation and the  $\text{Ca}^{2+}$  ion (green sphere) is indicated.

**C)** Nucleotide and metal ion ligands of BiP(NBD)• $\text{Ca}^{2+}$ •ADP and DnaK• $\text{Mg}^{2+}$ •ATP (PDB 4B9Q) based on nucleotide alignment. ADP, ATP,  $\text{Ca}^{2+}$  (green sphere), and  $\text{Mg}^{2+}$  (grey sphere) are shown.

**D)** Nucleotide and metal ion ligands of human Hsp70-2(NBD)• $\text{Mg}^{2+}$ •ADP• $\text{P}_i$  (PDB 3I33) and human Hsp70(NBD)• $\text{Ca}^{2+}$ •ADP• $\text{P}_i$  (PDB 1S3X) based on nucleotide alignment. ADP,  $\text{Ca}^{2+}$  (green sphere), and  $\text{Mg}^{2+}$  (grey sphere) are shown.

**E)** Ribbon diagram showing coordination of a surface-bound  $\text{Ca}^{2+}$  ion (green sphere) in the BiP(NBD) structure, involving contacts to the crystallographic neighbouring molecule (chain B; grey). Relevant water molecules (red spheres) as well as ADP (surface representation) and  $\text{Ca}^{2+}$  within the nucleotide binding cleft are indicated. A  $\text{Ca}^{2+}$  ion was also identified at the corresponding surface position in structures of Hsp70(NBD) and Hsc70(NBD). In neither case does this  $\text{Ca}^{2+}$  ion participate in coordination of the nucleotide.

## Figure 6-figure supplement 2

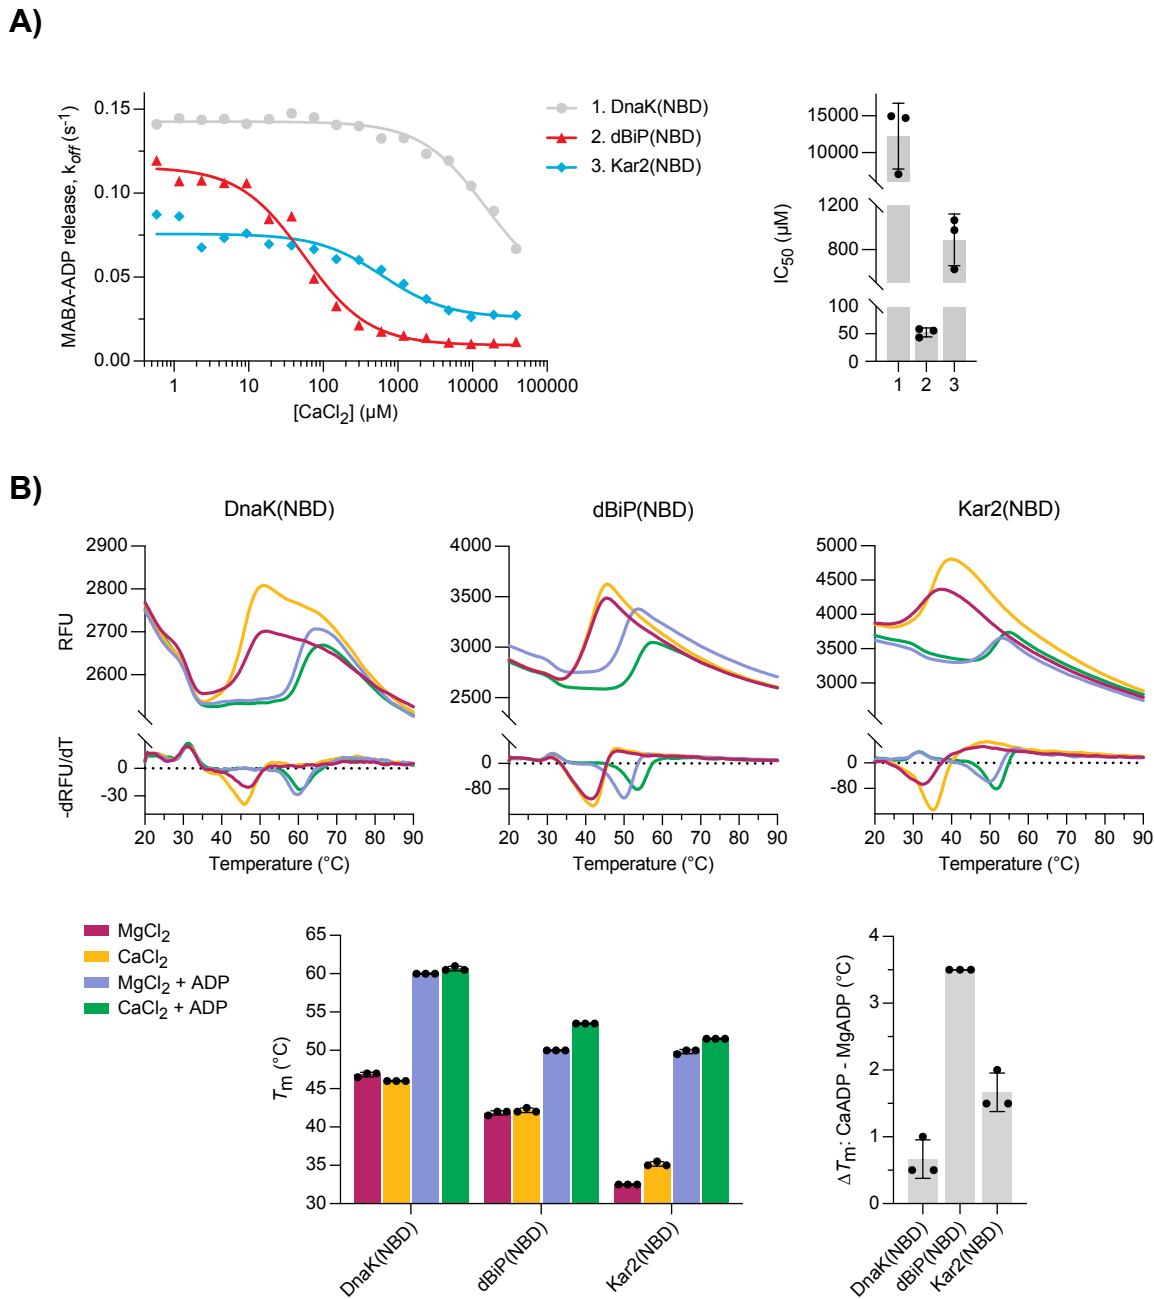

## Figure 6-figure supplement 2

### Characterisation of nucleotide binding domains of *Drosophila* BiP, DnaK, and Kar2

**A)** MABA-ADP dissociation rates from the indicated NBDs plotted against  $[\text{CaCl}_2]$  of a representative experiment. The experiment was performed as in **Figure 3A**. All samples contained  $\text{MgCl}_2$  (3 mM).  $\text{CaCl}_2$  was present at increasing concentrations during NBD:MABA-ADP complex formation. Graph: the half maximal inhibitory concentration ( $\text{IC}_{50}$ ) of  $\text{CaCl}_2$  (mean  $\pm$  SD) was calculated from three independent experiments.

**B)** Melting temperatures ( $T_m$ ) of the indicated NBDs (at 5  $\mu\text{M}$ ) were measured by differential scanning fluorimetry (DSF) in presence of  $\text{MgCl}_2$  or  $\text{CaCl}_2$  (each 6 mM) without or with ADP (4 mM). Top: representative melt curves with their negative first derivatives (RFU, relative fluorescence units). Left bar graph: mean  $T_m \pm$  SD of three independent experiments. Right bar graph: difference in  $T_m$  ( $\Delta T_m$ ) between  $\text{MgADP}$  and  $\text{CaADP}$  containing samples.

## Figure 7

Preissler et al.

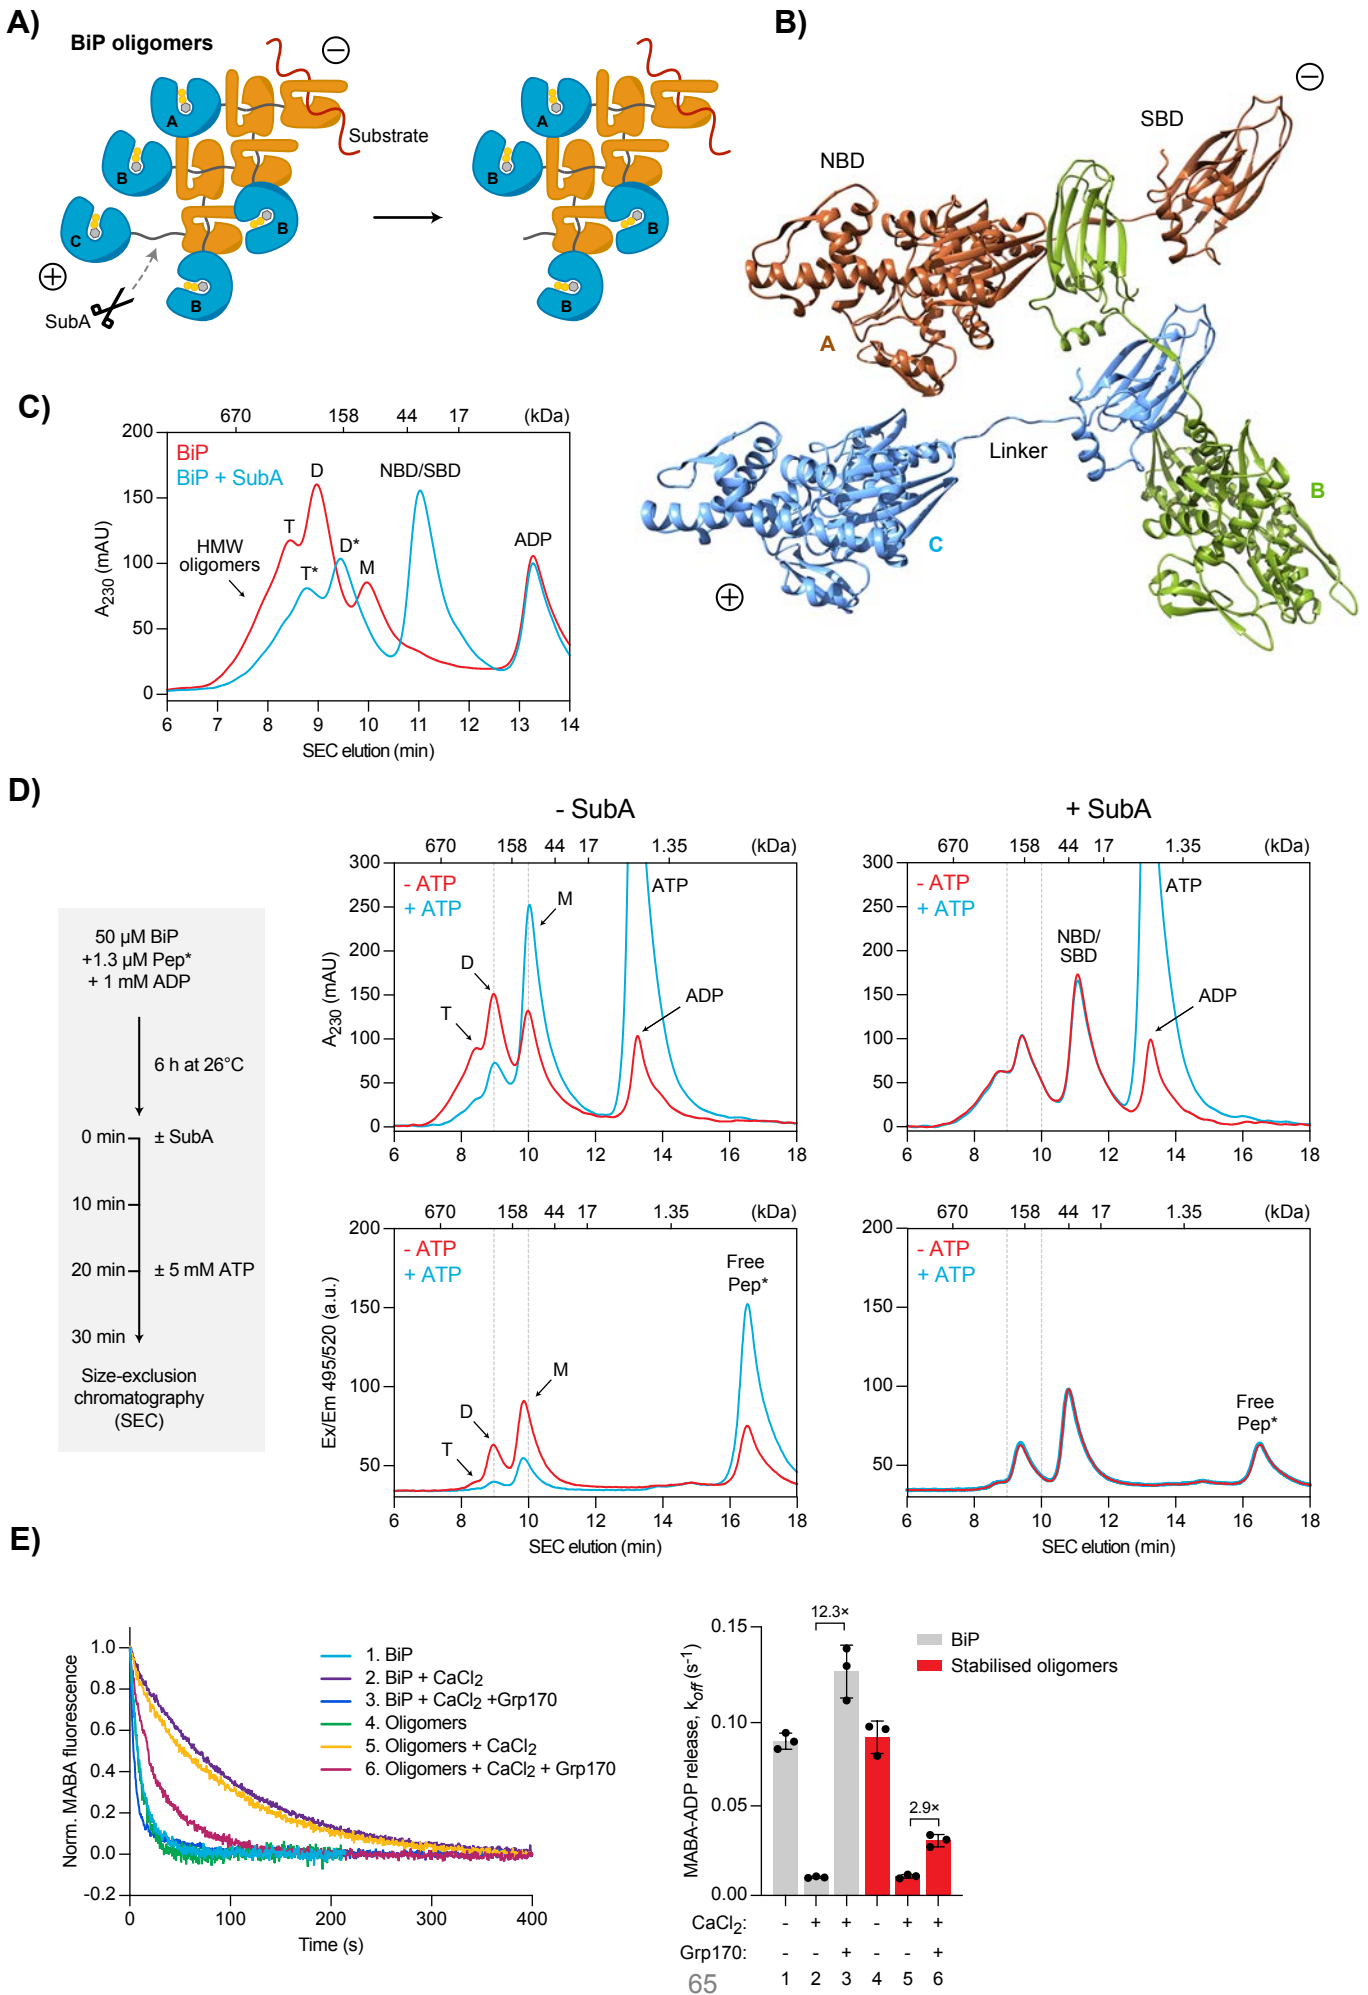

## Figure 7

### Effect of calcium on BiP oligomers in vitro

**A)** Schematic representation of BiP oligomers. Unfolded substrate protein (red) and the distinct types of BiP protomers (A, B and C) are shown. Oligomers are directional assemblies with minus (-) and plus (+) ends. The cleavage site for the BiP linker-specific protease SubA (scissors) is only accessible on (+)-end protomer (C). The predicted inert BiP oligomer lacking the C protomer nucleotide binding domain (a result of SubA cleavage) is shown on the right.

**B)** Ribbon diagram of apo BiP<sup>T229A-V461F</sup> oligomers formed by typical substrate interactions between protomers. Three protomers (labelled A-C according to 'A') are presented in different colours.

**C)** Size-exclusion chromatography (SEC) elution profile of BiP. BiP was incubated with ADP (1 mM) and where indicated treated with SubA before SEC. Monomeric (M), dimeric (D), and trimeric BiP (T) is indicated. Heterogenous high molecular weight (HMW) BiP complexes elute early as a shoulder. Note that the peaks of proteolytic cleavage products originating from trimers and dimers (\*) are shifted to later elution times. Also note the disappearance of BiP monomers and a new peak of the individual nucleotide and substrate binding domains (NBD and SBD) after treatment with SubA.

**D)** SEC elution profile as in 'C' of BiP and substrate peptide. BiP was incubated with trace amounts of fluorescently labelled substrate peptide (NR; Pep\*) in presence of ADP at indicated concentrations. Where indicated the samples were exposed at  $t = 0$  to SubA for 30 min before SEC. Where indicated excess of ATP was added 10 min before SEC. Peptide bond absorbance at 230 nm ( $A_{230}$ ) and the fluorescence signal of the labelled peptide were recorded separately.

**E)** Representative plot of fluorescence against time of complexes of MABA-ADP and BiP or purified, stabilised BiP oligomers (each 1.3  $\mu$ M) formed in presence of either MgCl<sub>2</sub> or CaCl<sub>2</sub> (each 3 mM). Excess of ATP (1.5 mM) without or with Grp170 (1.3  $\mu$ M) was added at  $t = 0$  to reveal nucleotide release. Graph: mean MABA-ADP dissociation rate constants ( $k_{off}$ )  $\pm$  SD from three independent experiments. Final concentrations are given.

## Figure 7-figure supplement 1

Preissler et al.

A)

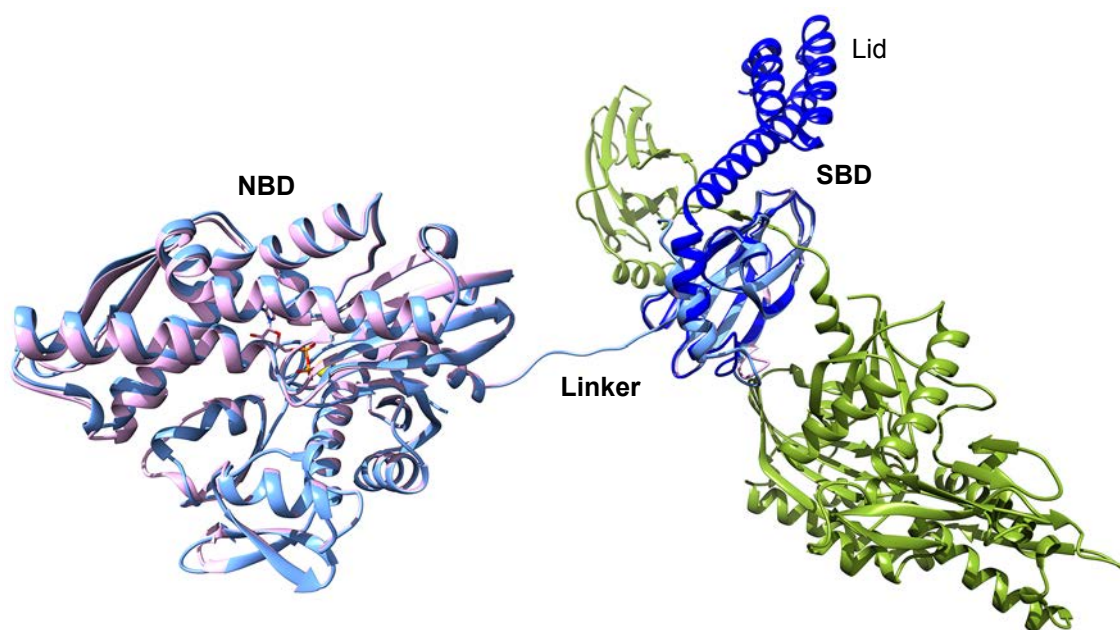

B)

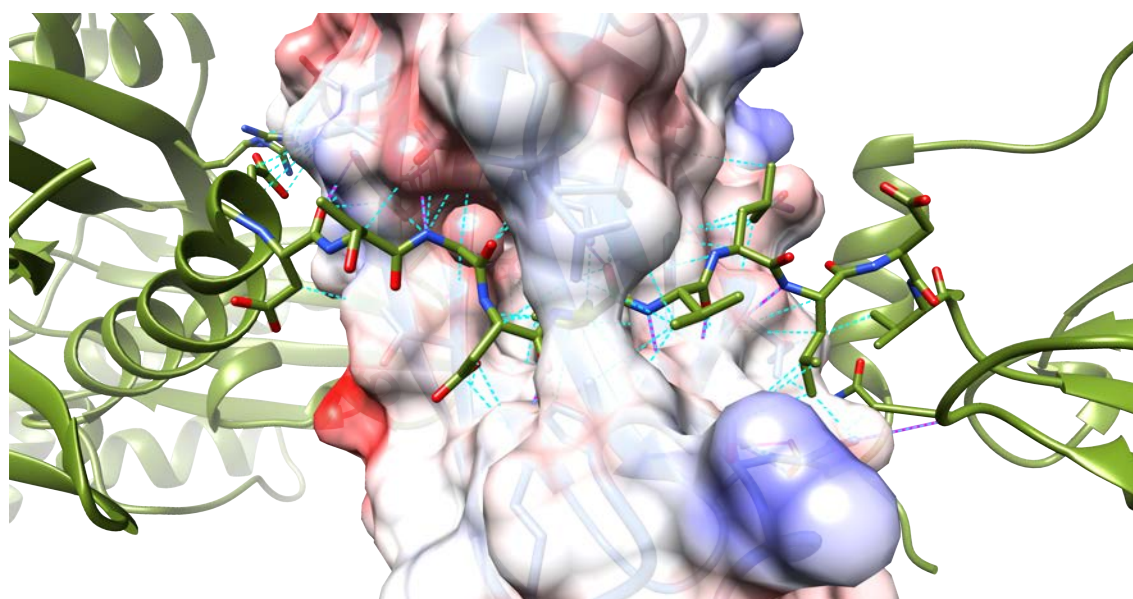



## Figure 7-figure supplement 1

### Structural features of oligomeric BiP

**A)** Superposition of the asymmetric unit of a lid-truncated ADP-bound oligomeric BiP (pink) onto the biological (dimeric) assembly of oligomeric apo-BiP protomers (light blue and green, as in Figure 7B) reveals a highly similar conformation. ADP is shown in stick form with its coordinating  $K^+$  ion (yellow sphere). The isolated substrate binding domain (SBD) of DnaK, including the C-terminal lid structure in the closed conformation (dark blue; PDB 1DKZ), is also aligned and reveals only minor conformational differences to the lid-truncated SBD of oligomeric BiP.

**B)** Close-up view of the interdomain linker of one BiP protomer (green) bound to the SBD of another BiP protomer as in 'A'. The surface of the linker-binding SBD is shown with translucent coulombic surface colouring. All residues participating in trans-protomer interactions are shown as sticks. Hydrogen bonds are highlighted with solid magenta pseudo bonds and van der Waals interactions are represented by cyan dashed pseudo bonds. Note that the majority of the linker side chains occupy the hydrophobic surface of the substrate binding groove and most polar bonds are to mainchain amide atoms of the  $\beta$ -sheet scaffold of the SBD.

## Figure 7-figure supplement 2

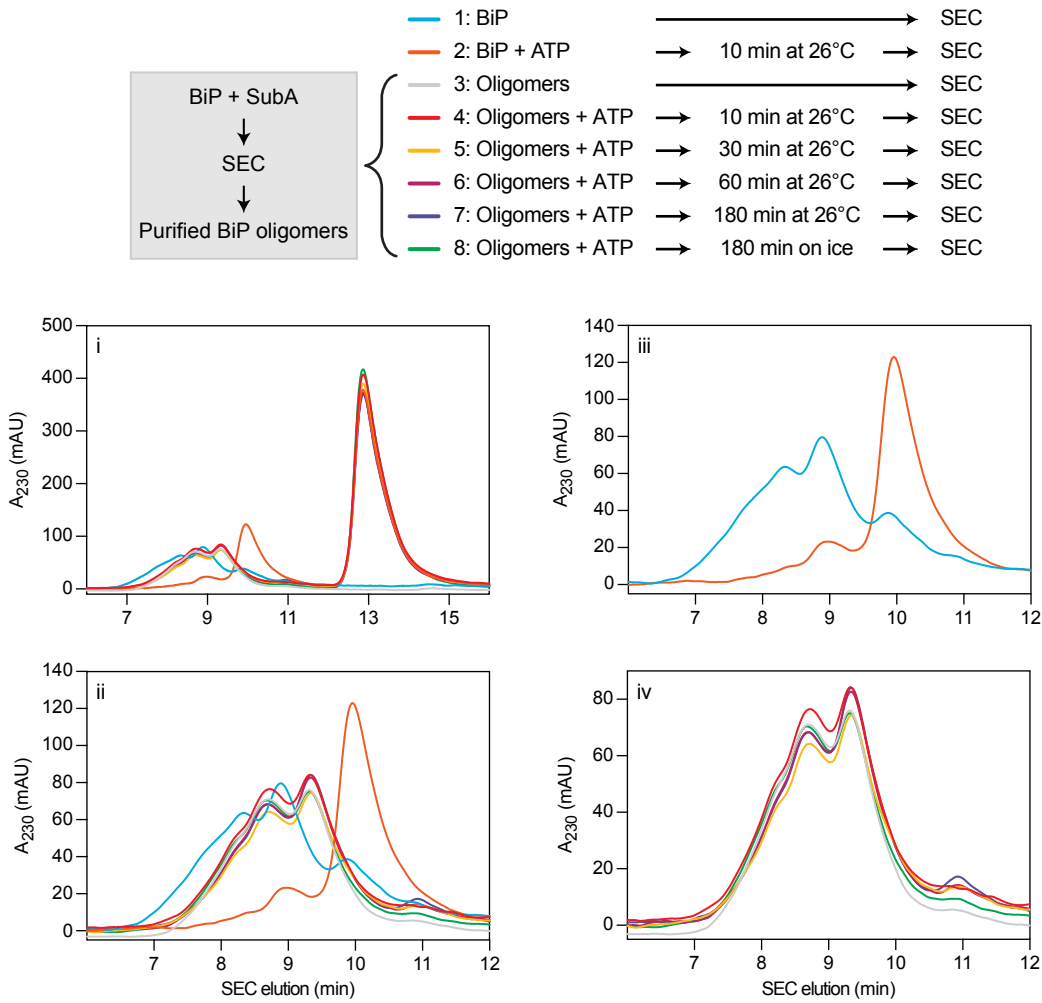

## Figure 7-figure supplement 2

### Stability of purified BiP oligomers after cleavage with SubA, assessed by size-exclusion chromatography

Size-exclusion chromatography (SEC) elution profile of BiP or purified BiP oligomers. BiP oligomers were isolated after cleavage by SubA and frozen. Thawed samples were exposed to ATP for indicated times before SEC analysis. As a control, uncleaved BiP was loaded. Note that purified BiP oligomers were stable in presence of ATP.

Panels ‘ii – iv’ represent different detailed views of the chromatogram shown in ‘i’.

**Figure 8**

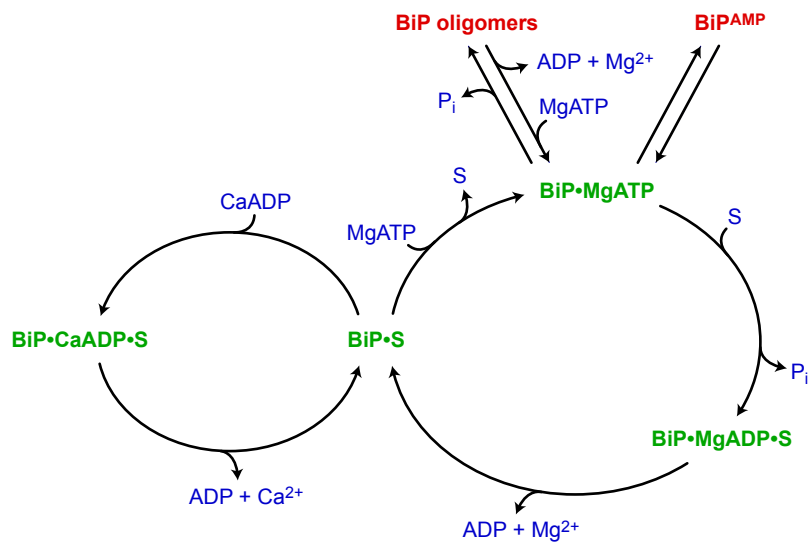

## Figure 8

### Calcium-dependent alternative fates of BiP during nucleotide exchange

The interaction of BiP with its substrates (S) is driven by an ATPase-dependent chaperone cycle, whereby ATP binding triggers substrate release and ATP hydrolysis (to ADP and orthophosphate;  $P_i$ ) induces high-affinity substrate binding (right cycle). Re-binding of ADP (instead of ATP) to BiP during post-hydrolysis nucleotide exchange stabilises the interaction between BiP and substrate (left cycle). Because  $Ca^{2+}$  enhances the affinity of ADP for BiP, and ADP competes with ATP for binding to BiP, substrate interaction-stabilising ADP-to-ADP exchange cycles are favoured by high  $[Ca^{2+}]$  and a low ATP:ADP ratio, whereas a decline in  $[Ca^{2+}]$  favours ADP-to-ATP exchange and substrate release. BiP can also oligomerise into conformationally-locked (functionally inactive) assemblies by ATP hydrolysis-dependent substrate interactions amongst BiP proteins. The restricted ability of oligomeric BiP to respond allosterically to ATP binding (and the resistance of oligomeric BiP to NEF-stimulated ADP release; not shown) kinetically stabilises oligomers at the expense of heterodimeric BiP-substrate complexes in the  $Ca^{2+}$ -depleted ER. In the ATP-bound state, BiP is also subject to inactivation by reversible, covalent modification — AMPylation ( $BiP^{AMP}$ ), however, this process is in competition both with recruitment of BiP to the chaperone cycle and with oligomerisation.

**Table S1**

|                                 | BiP NBD                | Hsp70 NBD                                     | Hsc70 NBD              | Apo BiP Oligomer       | ADP BiP Oligomer       |
|---------------------------------|------------------------|-----------------------------------------------|------------------------|------------------------|------------------------|
| <b>Data collection</b>          |                        |                                               |                        |                        |                        |
| Synchrotron stations (DLS)      | I03                    | I04                                           | I04                    | I24                    | I24                    |
| Space group                     | P1                     | P2 <sub>1</sub> 2 <sub>1</sub> 2 <sub>1</sub> | P12 <sub>1</sub> 1     | P12 <sub>1</sub> 1     | P12 <sub>1</sub> 1     |
| a,b,c; Å                        | 48.36, 51.86, 93.08    | 46.17, 63.71, 144.50                          | 73.68, 78.04, 75.38    | 50.33, 51.29, 119.72   | 50.18, 51.25, 188.80   |
| $\alpha, \beta, \gamma; ^\circ$ | 78.07, 86.72, 62.28    | 90.00, 90.00, 90.00                           | 90.00, 101.26, 90.00   | 90.00, 100.17, 90.00   | 90.00, 99.77, 90.00    |
| Resolution, Å*                  | 29.14-1.88 (1.92-1.88) | 29.53-1.52 (1.54-1.52)                        | 73.73-1.85 (1.89-1.85) | 59.92-1.77 (1.81-1.77) | 29.27-1.94 (1.99-1.94) |
| Rmerge*                         | 0.063 (0.989)          | 0.065 (0.703)                                 | 0.120 (1.005)          | 0.054 (0.844)          | 0.047 (0.533)          |
| $\langle I/\sigma(I) \rangle^*$ | 18.2 (1.8)             | 14.0 (2.3)                                    | 8.9 (1.4)              | 9.9 (1.1)              | 13.7 (2.0)             |
| CC1/2*                          | 0.999 (0.669)          | 0.998 (0.814)                                 | 0.998 (0.633)          | 0.975 (0.531)          | 0.999 (0.717)          |
| No. of unique reflections*      | 62200 (3792)           | 66932 (3125)                                  | 71566 (4400)           | 58872 (3347)           | 43705 (2937)           |
| Completeness, %*                | 97.4 (90.4)            | 99.7 (95.1)                                   | 100.0 (100.0)          | 99.9 (99.8)            | 99.1 (94.5)            |
| Redundancy*                     | 8.9 (7.5)              | 6.7 (6.3)                                     | 6.7 (5.7)              | 3.2 (3.2)              | 3.3 (3.2)              |
| <b>Refinement</b>               |                        |                                               |                        |                        |                        |
| Rwork/Rfree                     | 0.209/0.225            | 0.196/0.212                                   | 0.218/0.247            | 0.185/0.217            | 0.184/0.226            |
| No. of atoms (non H)            | 6137                   | 3417                                          | 6399                   | 4432                   | 4327                   |
| Average B-factors               | 32.46                  | 18.59                                         | 22.9                   | 32.8                   | 34.439                 |
| RMS Bond lengths Å              | 0.002                  | 0.002                                         | 0.002                  | 0.006                  | 0.006                  |
| RMS Bond angles, °              | 1.163                  | 1.163                                         | 1.172                  | 1.341                  | 1.338                  |
| Ramachandran favoured region, % | 99.34                  | 99.17                                         | 98.28                  | 98.66                  | 98.27                  |
| Ramachandran outliers, %        | 0                      | 0                                             | 0                      | 0                      | 0                      |

|                               |            |            |            |            |            |
|-------------------------------|------------|------------|------------|------------|------------|
| MolProbity score <sup>†</sup> | 0.78 (100) | 0.83 (100) | 0.80 (100) | 0.96 (100) | 0.99 (100) |
| PDB code                      | 6ZYH       | 6ZYI       | 6ZYJ       | 7A4U       | 7A4V       |

**Table S1 Data Collection and refinement statistics.**

\*Values in parentheses are for highest-resolution shell.

†100<sup>th</sup> percentile is the best among structures of comparable resolutions. 0<sup>th</sup> percentile is the worst.



Table S2

| ID     | Plasmid name                        | Description                                                                                                                         | Encoded protein      | Reference                       |
|--------|-------------------------------------|-------------------------------------------------------------------------------------------------------------------------------------|----------------------|---------------------------------|
| UK173  | haBiP_27-654_pQE10                  | Bacterial expression of His-tagged Chinese hamster BiP amino acids 27-654                                                           | BiP                  | PMID: 18923430                  |
| UK838  | haBiP_27-654_T229A_pQE10            | Bacterial expression of His-tagged ATPase deficient mutant Chinese hamster BiP amino acids 27-654                                   | BiP <sup>T229A</sup> | PMID: 26473973                  |
| UK1965 | mpP58_390-455_WT_AviTag_pQE10       | Bacterial expression of minimal murine ERdj6 J-domain WT amino acids 390-455 with C-term AviTag-His6                                | J                    | This study                      |
| UK1966 | mpP58_390-455_H422Q_AviTag_pQE10    | Bacterial expression of minimal murine ERdj6 J-domain amino acids 390-455 with C-term AviTag-His6 and a H422Q mutation              | J <sup>QPD</sup>     | This study                      |
| UK1983 | yUlp1(402-621)-StreptII_pET24       | Bacterial expression vector for the production of yeast Ulp1 protease with a C-terminal StreptII tag                                | Ulp1-StreptII        | PMID: 31531998                  |
| UK2039 | haBiP_28-413_WT_pQE30_Sm            | Bacterial expression of Chinese hamster BiP NBD (amino acids 28-413) without acidic N-term                                          | BiP NBD              | This study                      |
| UK2090 | haBiP_28-549_T229A_V461F_pQE30_Sm   | Bacterial expression of ATPase and substrate binding deficient, lid truncated BiP (N-terminal H6-Smt3 fusion)                       | Lidless BiP          | This study                      |
| UK2093 | hsHYPE_104-445_L258D_H363A_pQE30_Sm | Bacterial expression of inactive and monomeric human H363A mutant of His6-Smt3-HYPE_104-445                                         | FICD                 | PMID: 31531998                  |
| UK2225 | huORP150_33-999_pCA833              | Bacterial expression of human ORP150/Grp170 (from Claes Andreasson) with N-terminal His6-Smt3                                       | Grp170               | Gift from Claes Andréasson lab  |
| UK2243 | pSUMO-DnaK                          | Bacterial expression of E. coli DnaK carrying N-terminal His6-Smt3 on a pET-24-derivative                                           | DnaK                 | PMID: 29064368                  |
| UK2354 | dBIP_29-635_pQE30_Smt3              | Bacterial expression of Drosophila melanogaster BiP amino acids 29-635 with N-terminal His6-SUMO                                    | dBIP                 | This study                      |
| UK2469 | FLAGM1_TCRa_22-243_IL2RA            | Mammalian expression of TCRalpha (source sequence PMID 3027582) FLAG-M1- and turquoise-tagged with a transmembrane domain of IL2RA  | TCRalpha             | This study                      |
| UK2470 | EcDnaJ_1-72_AviTag_pET30a           | Bacterial Expression of isolated J-domain of E. coli DnaJ (amino acids 1-72) as a fusion with AviTag-His6                           | DnaJ                 | This study                      |
| UK2510 | pCA528-hsHsp70                      | Bacterial expression of full-length human HSPA1A (Hsp70) (natural variant E110D)                                                    | Hsp70                | Gift from Matthias P. Mayer lab |
| UK2511 | pCA528-hsHsc70                      | Bacterial expression of full-length human HSPA8 (Hsc70)                                                                             | Hsc70                | Gift from Matthias P. Mayer lab |
| UK2520 | FLAGM1_TCRa_22-243_N/Q              | Mammalian expression of non-glycosylated version of TCRalpha-n/Q FLAG-M1- and turquoise-tagged with a transmembrane domain of IL2RA | TCRalpha-N/Q         | This study                      |
| UK2531 | pSUMO-DnaK-1-388                    | Bacterial expression of E. coli DnaK NBD amino acids 1-388 with N-terminal Smt3-His6 tag                                            | DnaK NBD             | This study                      |
| UK2532 | pSUMO-Hsp70-1-390                   | Bacterial expression of human Hsp70 NBD amino acids 1-390 with N-terminal Smt3-His6 tag (natural variant E110D)                     | Hsp70 NBD            | This study                      |
| UK2533 | pSUMO-Hsc70_1-390                   | Bacterial expression of human Hsc70 NBD amino acids 1-390 with N-terminal Smt3-His6 tag                                             | Hsc70 NBD            | This study                      |
| UK2534 | dBIP-NBD_pQE30-H6-Smt3              | Bacterial expression of Drosophila melanogaster dBIP NBD with N-terminal Smt3-His6 tag                                              | dBIP NBD             | This study                      |
| UK2606 | Kar2_42-433_pCA528_pET24a           | Bacterial expression Saccharomyces cerevisiae Kar2 NBD amino acids 42-433 with N-terminal Smt3-His6 tag                             | Kar2 NBD             | This study                      |
